# Supplementary material for: Total synthesis of methymycin
Source: Royal Society of Chemistry journal article supplement (doi:10.1039/b911200f), 2009-01-01

## **Total Synthesis of Methymycin**

Hong-Se Oh, Richeng Xuan and Han-Young Kang\*

*Department of Chemistry, Chungbuk National University, Cheongju, Chungbuk 361-763, Republic of  
Korea*

*hykang@chungbuk.ac.kr*

## **Supplementary Information**

### **Table of contents**

|                                                    |         |
|----------------------------------------------------|---------|
| Table of contents                                  | S1      |
| General Methods                                    | S2      |
| Experimental section                               | S3      |
| <sup>1</sup> H-NMR and <sup>13</sup> C-NMR spectra | S17-S45 |

## General Methods

$^1\text{H}$  NMR and  $^{13}\text{C}$  NMR spectra were recorded on a Bruker DPX-300 and Bruker Avance 500 NMR Spectrometer. The chemical shifts are reported in ppm on scale downfield from TMS, and signal patterns are indicated as follows: s, singlet; d, doublet; t, triplet; m, multiplet; br, broad peak. IR spectra were recorded on JASCO FT/IR-300E. Optical rotations were measured by JASCO DIP-1000 digital polarimeter in solution in a 1-dm cell. High resolution mass spectra were recorded on a Jeol JMS700 by using FAB method. All reagent and solvents were reagent grade and used without further purification unless specified otherwise. Technical grade ethyl acetate, hexane, and pentane used for column chromatography were distilled prior to use. Tetrahydrofuran (THF) and diethyl ether, when used as solvents for reactions, were freshly distilled from sodium-benzophenone ketyl. Dimethylformamide (DMF) was stored over 4-Å molecular sieves, and diethylamide was distilled before use. Flash chromatography was carried out on Woelm 32-64  $\mu\text{m}$  silica packed in glass columns.

## Experimental Section

### (2*R*)-1-Benzyloxy-2-(methoxymethoxy)butane (**4**)

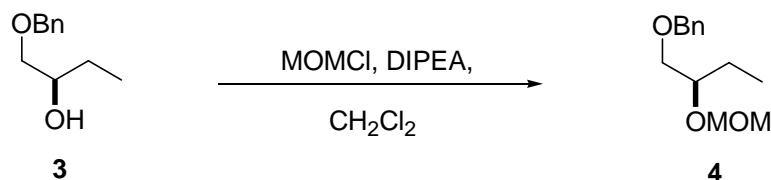

To a solution of (2*R*)-1-benzyloxybutan-2-ol (**3**) (1.70 g, 9.43 mmol) obtained as described in the previous procedure in CH<sub>2</sub>Cl<sub>2</sub> (20 mL) was added *N,N*-diisopropylethylamine (10.1 mL, 56.6 mmol) at 0 °C. The resulting solution was stirred for 30 min at 0 °C, and to this solution was added the chloromethylmethyl ether (2.14 mL, 28.3 mmol). After stirred for 10 min at 0 °C and the solution was warmed to room temperature, stirred for 16 h. After the reaction was completed, saturated aqueous NH<sub>4</sub>Cl solution (20 mL) was added. The organic layer was separated, and the aqueous layer was extracted with ether (3 × 30 mL). The organic solutions were combined, dried (MgSO<sub>4</sub>), and concentrated. Purification of the residue by flash chromatography (hexane:EtOAc=7:1) afforded (2*R*)-1-benzyloxy-2-(methoxymethoxy)butane (**4**) (1.69 g, 80%) as a colorless oil: [α]<sub>D</sub><sup>25.5</sup> 19.6 (*c* 1.62, CHCl<sub>3</sub>); IR (film): 2932.2, 1723.1, 1455.0, 1365.4, 1273.8, 1210.1, 1103.1, 1040.4, 918.9, 846.6 cm<sup>-1</sup>; <sup>1</sup>H NMR (300 MHz, CDCl<sub>3</sub>): δ 0.99 (t, *J* = 7.5 Hz, 3H), 1.72~1.55 (m, 2H), 3.42 (s, 3H), 3.55 (d, *J* = 5.0 Hz, 2H), 3.76 (m, 1H), 4.58 (s, 2H), 4.72 (d, *J* = 6.8 Hz, 1H), 4.81 (d, *J* = 6.8 Hz, 1H), 7.38~7.27 (m, 5H); <sup>13</sup>C NMR (75 MHz, CDCl<sub>3</sub>): δ 138.3, 128.2, 127.5, 127.4, 95.9, 77.4, 73.2, 72.3, 55.3, 24.8, 9.7; HRMS: *m/z* calcd for C<sub>13</sub>H<sub>21</sub>O<sub>3</sub>(M+H)<sup>+</sup>, 225.1491, found: 225.1486.

### (2*R*)-2-(Methoxymethoxy)butan-1-ol (**5**)

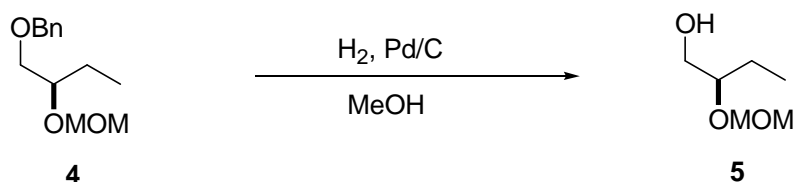

A solution of (2*R*)-1-benzyloxy-2-(methoxymethoxy)butane (**4**) (1.69 g, 7.53 mmol) in MeOH (30 mL) was stirred under hydrogen (1 atm, balloon) at room temperature in the presence of 5% palladium on charcoal (3.4 g). The resulting mixture was stirred at room temperature for 18 h. After filtration through a pad of Celite with ether (3 × 30 mL), the solution was concentrated.

Purification by flash chromatography (pentane:ether = 1:1) afforded the alcohol **5** (1.01 g, 92%) as a colorless oil:  $[\alpha]_D^{26.6}$  66.1 (*c* 1.36, CHCl<sub>3</sub>); IR (film): 3419.2, 2936.1, 1648.8, 1463.7, 1214.0, 1038.5, 918.0, 836.0, 419.4 cm<sup>-1</sup>; <sup>1</sup>H NMR (300 MHz, CDCl<sub>3</sub>): δ 0.87 (t, *J* = 7.5 Hz, 3H), 1.52~1.40 (m, 2H), 3.16 (s, 1H), 3.33 (s, 1H), 3.45 (m, 2H), 3.53 (m, 1H), 4.67 (dd, *J* = 17.0, 6.9 Hz, 2H); <sup>13</sup>C NMR (75 MHz, CDCl<sub>3</sub>): δ 96.5, 82.5, 64.8, 55.3, 24.3, 9.7; HRMS: *m/z* calcd for C<sub>6</sub>H<sub>15</sub>O<sub>3</sub>(M+H)<sup>+</sup>, 135.1021, found:135.1025

(4*R*)-4-(Methoxymethoxy)hex-1-en-3-one (**7**)

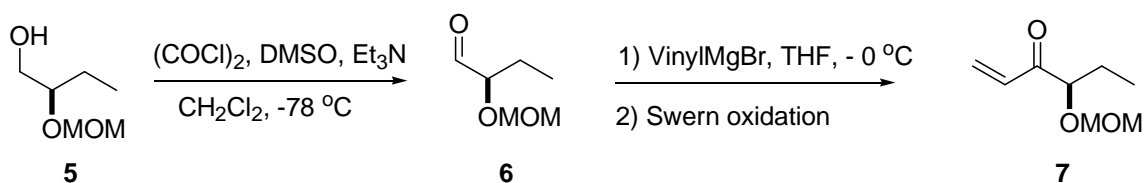

A flame-dried round-bottomed flask was charged with a solution of oxalyl chloride (4.20 mL, 48.1 mmol) in CH<sub>2</sub>Cl<sub>2</sub> (30 mL) at -78 °C. The mixture was added dimethyl sulfoxide (3.94 mL, 55.5 mmol) at -78 °C. This mixture was stirred for 30 min before alcohol **5** (1.66 g 12.3 mmol) in CH<sub>2</sub>Cl<sub>2</sub> (6 mL) was added. After 10 min, the reaction mixture was added triethylamine (25.8 mL, 185 mmol) and stirred for 10 min. The mixture was warmed to room temperature and stirred for 1 h. The reaction mixture was diluted with ether (40 mL) and saturated aqueous NH<sub>4</sub>Cl solution (20 mL). The organic layer was separated, and the aqueous layer was extracted with ether (3 × 40 mL), and washed with saturated aqueous NaCl (50 mL). The organic solutions were combined, dried (MgSO<sub>4</sub>), and concentrated to provide the desired (2*R*)-2-(methoxymethoxy)butanal (**6**) (1.63 g, 100%) which was used for the next step without further purification.

To a stirred solution of the aldehyde **6** (1.63 g, 12.3 mmol) prepared as described in the previous procedure and THF (30 mL) was added vinylmagnesium bromide (1.00 M, 24.7 mL, 24.7 mmol) at 0 °C. After stirred for 1 h, the reaction mixture was diluted with ether (10 mL) and saturated aqueous NH<sub>4</sub>Cl solution (20 mL). The organic layer was separated, and the aqueous layer was extracted with ether (3 × 30 mL). The organic solutions were combined, dried (MgSO<sub>4</sub>), and concentrated. Purification of the residue by flash chromatography (pentane:ether = 1:1) afforded the desired vinyl alcohol (791 mg, 40%, 2 steps) as a colorless oil.

A flame-dried round-bottomed flask was charged with a solution of oxalyl chloride (1.03 mL, 11.9 mmol) in CH<sub>2</sub>Cl<sub>2</sub> (20 mL) at -78 °C. The mixture was added dimethyl sulfoxide (0.95 mL,

13.3 mmol) at -78 °C. This mixture was stirred for 30 min before the vinyl alcohol (791 mg, 4.95 mmol), which was prepared as described in the previous procedure, in CH<sub>2</sub>Cl<sub>2</sub> (3 mL) was added. After 10 min, the reaction mixture was added *N,N*-disopropyl ethylamine (4.41 mL, 24.7 mmol) and stirred for 10 min. The mixture was warmed to room temperature and stirred for 1 h. The reaction mixture was diluted with ether (40 mL) and saturated aqueous NH<sub>4</sub>Cl solution (20 mL). The organic layer was separated, and the aqueous layer was extracted with ether (3 × 30 mL), and washed with saturated aqueous NaCl (50 mL). The organic solutions were combined, dried (MgSO<sub>4</sub>), and concentrated. Purification of the residue by flash chromatography (pentane:ether = 1:1) afforded the desired vinyl ketone **7** (578 mg, 74%) as a colorless oil:  $[\alpha]_D^{24.4}$  66.1 (*c* 1.36, CHCl<sub>3</sub>); IR (film): 2938.0, 1700.9, 1614.1, 1462.7, 1403.0, 1159.0, 1103.1, 919.9 cm<sup>-1</sup>; <sup>1</sup>H NMR (300 MHz, CDCl<sub>3</sub>): δ 0.97 (t, *J* = 7.4 Hz, 3H), 1.76 (m, 2H), 3.34 (s, 3H), 3.33 (s, 1H), 4.13 (*J* = 6.5 Hz, 1H), 4.66~4.59 (dd, *J* = 14.0, 6.9 Hz, 2H), 6.40~5.7 (ddd, *J* = 17.4, 10.5, 1.6 Hz, 2H), 6.71~6.62 (dd, *J* = 17.4, 10.5 Hz, 1H); <sup>13</sup>C NMR (75 MHz, CDCl<sub>3</sub>): δ 200.0, 131.9, 129.3, 96.2, 82.4, 56.0, 25.4, 9.5.

(3*S*, 4*R*)-4-(Methoxymethoxy)-3-methylhex-1-en-3-ol (**8**)

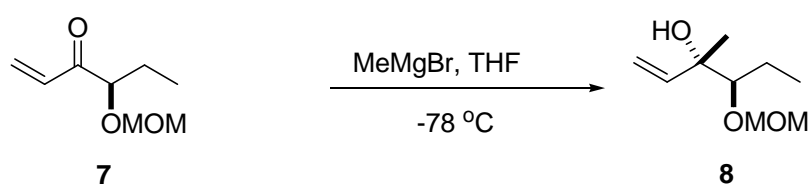

To a stirred solution of vinyl ketone **7** (578 mg, 3.65 mmol) in THF (15 mL) was added methylmagnesium bromide (3 M, 1.83 mL, 5.49 mmol) at -78 °C. After stirred for 1 h, the reaction mixture was diluted with Et<sub>2</sub>O (10 mL) and saturated aqueous NH<sub>4</sub>Cl solution (10 mL). The organic layer was separated, and the aqueous layer was extracted with ether (3 × 20 mL). The organic solutions were combined, dried (MgSO<sub>4</sub>), and concentrated. Purification of the residue by flash chromatography (pentane:ether = 1:1) afforded the desired alcohol **8** (625 mg, 98%) as a colorless oil:  $[\alpha]_D^{24.9}$  -23.4 (*c* 1.50, CHCl<sub>3</sub>); IR (film): 3449.1, 2967.9, 1716.3, 1641.1, 1462.7, 1367.3, 1103.1, 1034.6, 920.8 (film): cm<sup>-1</sup>; <sup>1</sup>H NMR (300 MHz, CDCl<sub>3</sub>): δ 0.97 (t, *J* = 7.4 Hz, 3H), 1.20 (s, 3H), 1.66~1.34 (m, 2H), 3.23~3.19 (dd, *J* = 9.9, 2.7 Hz, 1H), 3.40 (s, 3H), 3.72 (s, 1H), 4.64 (d, *J* = 6.8 Hz, 1H), 4.76 (d, *J* = 6.8 Hz, 1H), 5.32~5.11 (ddd, *J* = 17.3, 10.7, 1.6 Hz, 2H), 6.00~5.90 (dd, *J* = 17.3, 10.7 Hz, 1H); <sup>13</sup>C NMR (75 MHz, CDCl<sub>3</sub>): δ 141.1, 113.5, 99.0, 91.9, 74.5, 56.0, 24.5, 24.2, 11.0; HRMS: *m/z* calcd for C<sub>9</sub>H<sub>17</sub>O<sub>2</sub>(M+H-H<sub>2</sub>O)<sup>+</sup>, 157.1229, found:157.1235.

(3*S*, 4*R*)-3-Methylhex-1-en-3,4-diol (**9**)

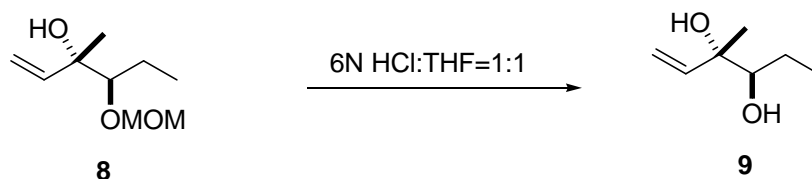

To a stirred solution of alcohol **8** (625 mg, 3.59 mmol) in dry THF (3 mL) at room temperature was added 6 N HCl (3 mL). After stirred for 2 h, the reaction mixture was diluted with ether (10 mL) and aqueous saturated NaHCO<sub>3</sub> (10 mL). The layers were then separated and the aqueous layer was extracted with ether (3 × 10 mL). The combined organic layers were washed with saturated aqueous NaCl (10 mL), and dried (MgSO<sub>4</sub>). After being concentrated, purification of the residue by flash chromatography (pentane:ether = 1:1) afforded the desired diol **9** (322 mg, 69%) as a colorless oil:  $[\alpha]_D^{24.3}$  18.5 (*c* 1.28, CHCl<sub>3</sub>); IR (film): 3427.9, 2974.7, 2878.2, 1644.0, 1456.0, 1414.5, 1099.2, 976.8, 922.8, 883.2 cm<sup>-1</sup>; <sup>1</sup>H NMR (300 MHz, CDCl<sub>3</sub>): δ 0.96 (t, *J* = 7.4 Hz, 3H), 1.21 (s, 3H), 1.57~1.11 (m, 2H), 2.93 (s, 2H), 3.26 (dd, *J* = 10.5, 2.2 Hz, 1H), 5.26~5.08 (ddd, *J* = 10.8, 10.0, 1.3 Hz, 2H), 5.91~5.81 (dd, *J* = 17.4, 10.8 Hz, 1H); <sup>13</sup>C NMR (75 MHz, CDCl<sub>3</sub>): δ 140.7, 114.3, 79.7, 75.5, 24.5, 24.1, 11.1, 10.8; HRMS: *m/z* calcd for C<sub>7</sub>H<sub>13</sub>O(M+H-H<sub>2</sub>O)<sup>+</sup>, 113.0966, found:113.0965.

(3*R*)-3-(Methoxymethoxy)-pentan-2-one (**10**)

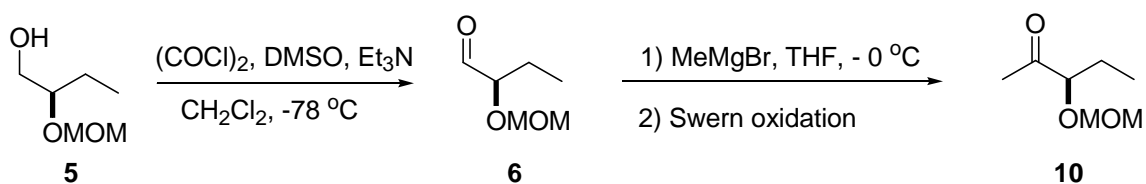

A flame-dried round-bottomed flask was charged with a solution of oxalyl chloride (2.54 mL, 29.1 mmol) in CH<sub>2</sub>Cl<sub>2</sub> (20 mL) at -78 °C. To the mixture was added dimethyl sulfoxide (2.38 mL, 33.5 mmol) at -78 °C. This mixture was stirred for 30 min before alcohol **5** (1.00 g 7.45 mmol) in CH<sub>2</sub>Cl<sub>2</sub> (5 mL) was added. After stirred for 10 min, triethylamine (15.6 mL, 111.8 mmol) was added to the reaction mixture and the resulting mixture was stirred for 10 min. The mixture was warmed to room temperature and stirred for 1 h. The reaction mixture was diluted with ether (30 mL) and saturated aqueous NH<sub>4</sub>Cl solution (20 mL). The organic layer was separated, and the aqueous layer was extracted with ether (3 × 30 mL), and washed with saturated aqueous NaCl (40 mL). The organic solutions were combined, dried (MgSO<sub>4</sub>), and

concentrated to provide the desired aldehyde **6** which was used for the next step without further purification.

To a stirred solution of the aldehyde **6**, which was prepared as described in the previous procedure, in THF (20 mL) was added methylmagnesium bromide (3 M, 7.45 mL, 22.4 mmol) at 0 °C. The reaction mixture was stirred for 1 h before it was diluted with ether (10 mL). To this, then, was added a saturated aqueous NH<sub>4</sub>Cl solution (20 mL). The organic layer was separated, and the aqueous layer was extracted with ether (3 × 30 mL). The organic solutions were combined, dried (MgSO<sub>4</sub>), and concentrated. Purification of the residue by flash chromatography (pentane:ether = 1:1) afforded the desired alcohol (376 mg, 34%, 2 steps) as a colorless oil.

A flame-dried round-bottomed flask was charged with a solution of oxalyl chloride (0.861 mL, 9.87 mmol) in CH<sub>2</sub>Cl<sub>2</sub> (10 mL) at -78 °C. To the mixture was added dimethyl sulfoxide (0.808 mL, 11.4 mmol) at -78 °C. This mixture was stirred for 30 min before the alcohol (376 mg, 2.53 mmol), which was prepared in the previous step, in CH<sub>2</sub>Cl<sub>2</sub> (3 mL) was added. After 10 min, the reaction mixture was added triethylamine (5.29 mL, 38.0 mmol) and stirred for 10 min. The mixture was warmed to room temperature and stirred for 1 h. The reaction mixture was diluted with ether (10 mL) and saturated aqueous NH<sub>4</sub>Cl solution (10 mL). The organic layer was separated, and the aqueous layer was extracted with ether (3 × 20 mL), and washed with saturated aqueous NaCl (30 mL). The organic solutions were combined, dried (MgSO<sub>4</sub>), and concentrated. Purification of the residue by flash chromatography (pentane:ether = 1:1) afforded the desired methyl ketone **10** (296 mg, 80%) as a colorless oil:  $[\alpha]_D^{24.4}$  45.2 (*c* 1.13, CHCl<sub>3</sub>); IR (film): 2938.0, 1716.3, 1463.7, 1354.8, 1215.9, 1155.2, 1122.4, 1035.6, 918.9 cm<sup>-1</sup>; <sup>1</sup>H NMR (300 MHz, CDCl<sub>3</sub>): δ 0.97 (t, *J* = 7.4 Hz, 3H), 1.75~1.65 (m, 2H), 2.15 (s, 3H), 3.37 (s, 3H), 3.93 (t, *J* = 6.2 Hz, 1H), 4.67 (m, 1H); <sup>13</sup>C NMR (75 MHz, CDCl<sub>3</sub>): δ 209.9, 96.3, 83.8, 55.9, 26.0, 25.0, 9.5.

(3*R*, 4*R*)-4-(Methoxymethoxy)-3-methylhex-1-en-3-ol (**11**)

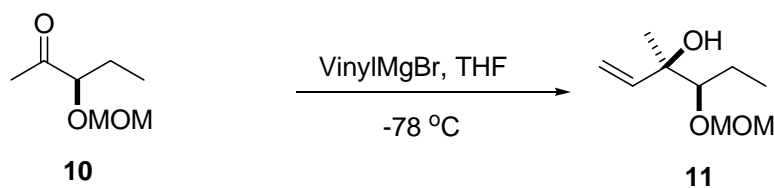

To a stirred solution of methyl ketone **10** (296 mg, 2.02 mmol), prepared as described in the

previous procedure, in THF (10 ml) was added vinylmagnesium bromide (1.00 M, 3.03 mL, 3.03 mmol) at -78 °C. After stirred for 1 h, the reaction mixture was diluted with Et<sub>2</sub>O (10 mL) and saturated aqueous NH<sub>4</sub>Cl solution (10 mL). The organic layer was separated, and the aqueous layer was extracted with ether (3 × 20 mL). The organic solutions were combined, dried (MgSO<sub>4</sub>), and concentrated. Purification of the residue by flash chromatography (pentane:ether = 1:1) afforded the desired alcohol **11** (218 mg, 62%) as a colorless oil:  $[\alpha]_D^{26.2}$  -19.3 (*c* 1.18, CHCl<sub>3</sub>); IR (film): 3449.1, 2967.9, 1641.1, 1462.7, 1367.3, 1103.1, 1034.6, 920.8 cm<sup>-1</sup>; <sup>1</sup>H NMR (300 MHz, CDCl<sub>3</sub>): δ 0.97 (t, *J* = 7.4 Hz, 3H), 1.18 (s, 3H), 1.63~1.27 (m, 2H), 3.17~3.13 (dd, *J* = 9.6, 2.7 Hz, 1H), 3.40 (s, 3H), 3.45 (s, 1H), 4.62 (d, *J* = 6.7 Hz, 1H), 4.75 (d, *J* = 6.7 Hz, 1H) 5.34~5.06 (ddd, *J* = 17.3, 10.7, 1.5 Hz, 2H), 5.87~5.78 (dd, *J* = 17.3, 10.7 Hz, 1H); <sup>13</sup>C NMR (75 MHz, CDCl<sub>3</sub>): δ 142.5, 113.8, 98.8, 90.1, 74.5, 55.9, 24.0, 21.8, 11.0; HRMS: *m/z* calcd for C<sub>9</sub>H<sub>17</sub>O<sub>2</sub>(M+H-H<sub>2</sub>O)<sup>+</sup>, 157.1229, found:157.1231.

(3*R*, 4*R*)-3-Methylhex-1-ene-3,4-diol (**12**)

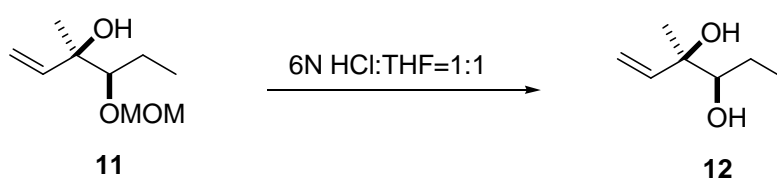

To a stirred solution of alcohol **11** (218 mg, 1.25 mmol) in dry THF (2 mL) at room temperature was added 6 N HCl (2 mL). After 2 h, the reaction mixture was diluted with ether (10 mL), then to this mixture was added aqueous saturated NaHCO<sub>3</sub> (5 mL). The layers were then separated and the aqueous layer was extracted with ether (3 × 10 mL). The combined organic layers were washed with saturated aqueous NaCl (10 mL), and dried (MgSO<sub>4</sub>). After being concentrated, purification of the residue by flash chromatography (pentane:ether = 1:1) afforded the desired diol **12** (86 mg, 53%) as a colorless oil:  $[\alpha]_D^{24.7}$  15.7 (*c* 0.61, CHCl<sub>3</sub>); IR (film): 3406.6, 2975.6, 2878.2, 1643.1, 1458.9, 1414.5, 1094.4, 975.8, 923.7 cm<sup>-1</sup>; <sup>1</sup>H NMR (300 MHz, CDCl<sub>3</sub>): δ 1.03 (t, *J* = 7.4 Hz, 3H), 1.23 (s, 3H), 1.63~1.28 (m, 2H), 2.22 (s, 2H), 3.34 (d, *J* = 10.0 Hz, 1H), 5.36~5.15 (ddd, *J* = 17.4, 10.8, 1.2 Hz, 2H), 5.96~5.86 (dd, *J* = 17.4, 10.7 Hz, 1H); <sup>13</sup>C NMR (75 MHz, CDCl<sub>3</sub>): δ 142.7, 114.2, 78.7, 75.5, 23.7, 21.4, 11.1; HRMS: *m/z* calcd for C<sub>7</sub>H<sub>13</sub>O(M+H-H<sub>2</sub>O)<sup>+</sup>, 113.0966, found:113.0968.

(1*R*,2*R*)-1-Ethyl-2-hydroxy-2-methylbut-3-enyl-(2*R*,3*S*,4*S*,6*R*)-3-(*tert*butyldimethylsilyloxy)-7-(4-methoxybenzyloxy)-2,4,6-trimethylheptanoate (**14b**)



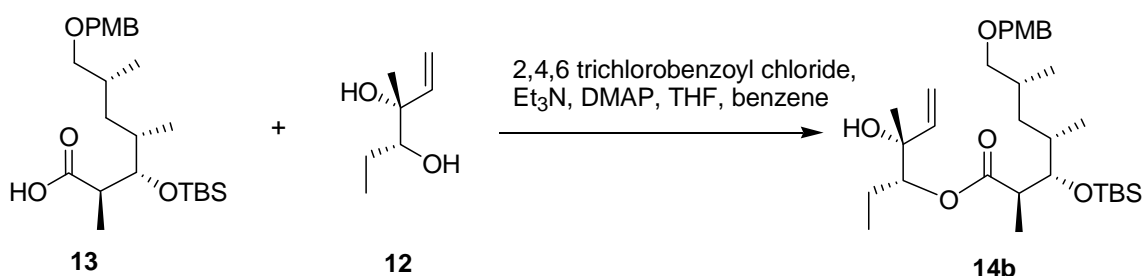

To a solution of carboxylic acid **13** (56 mg, 0.13 mmol) in THF (2 mL) at room temperature were added triethylamine (27  $\mu\text{L}$ , 0.19 mmol) and 2,4,6-trichlorobenzoyl chloride (25  $\mu\text{L}$ , 0.16 mmol). The mixture was stirred for 3 h at room temperature, and the solids were filtered off and washed with hexane (5 mL). The combined solution was concentrated under reduced pressure. The residue was dissolved in benzene (2 mL), and to this solution a solution of alcohol **12** (20 mg, 0.15 mmol) and DMAP (22 mg, 0.18 mmol) in benzene (2 mL) was added. After being stirred for 16 h, the reaction mixture was diluted with ether (10 mL), and washed with saturated  $\text{NaHCO}_3$  (5 mL) and saturated  $\text{NaCl}$  (5 mL), dried ( $\text{MgSO}_4$ ), and concentrated. Purification of the residue by flash chromatography (hexane/ $\text{EtOAc}$  = 4:1) afforded the desired ester **14b** (57 mg, 81%) as a colorless oil:  $[\alpha]_{\text{D}}^{22.3}$  16.8 ( $c$  1.17,  $\text{CHCl}_3$ ); IR (film): 3449.1, 2956.3, 1731.8, 1613.2, 1513.9, 1461.8, 1248.7, 1172.5, 1058.7, 836.0, 774.3  $\text{cm}^{-1}$ ;  $^1\text{H}$  NMR (300 MHz,  $\text{CDCl}_3$ ):  $\delta$  0.05 (s, 6H), 0.89 (m, 21H), 1.17 (d,  $J$  = 7.1 Hz, 3H), 1.21 (m, 3H), 1.40 (m, 2H), 1.70 (m, 2H), 1.81 (dddd,  $J$  = 13.1, 6.6, 6.6, 6.6 Hz, 1H), 2.29 (s, 1H), 2.62 (dddd,  $J$  = 13.8, 6.9, 6.9, 6.9 Hz, 1H), 3.21 (ddd,  $J$  = 32.0, 9.0, 5.6 Hz, 2H), 3.80 (s, 3H), 3.89 (dd,  $J$  = 5.6, 3.1 Hz, 1H), 4.42 (d,  $J$  = 12.5 Hz, 2H), 4.78 (dd,  $J$  = 10.0, 2.8 Hz, 1H), 5.10 (d,  $J$  = 10.7 Hz, 1H), 5.32 (d,  $J$  = 17.3 Hz, 1H), 5.89 (dd,  $J$  = 17.2, 10.7 Hz, 1H), 6.87 (d,  $J$  = 8.5 Hz, 2H), 7.26 (d,  $J$  = 8.5 Hz, 2H);  $^{13}\text{C}$  NMR (75 MHz,  $\text{CDCl}_3$ ):  $\delta$  176.1, 159.0, 142.8, 130.7, 129.1, 113.6, 113.5, 79.8, 75.4, 75.3, 75.0, 72.6, 55.2, 42.1, 36.9, 36.3, 31.0, 26.0, 23.3, 22.3, 18.5, 16.6, 14.6, 10.6, -4.1, -4.2; HRMS:  $m/z$  calcd for  $\text{C}_{31}\text{H}_{55}\text{O}_6\text{Si}(\text{M}+\text{H})^+$ , 551.3768, found: 551.3766.

(1*R*,2*R*)-1-Ethyl-2-hydroxy-2-methyl-but-3-enyl (2*R*,3*S*,4*S*,6*R*)-3-(*tert*butyldimethylsilyloxy)-2,4,6-trimethyl-7-oxonon-8-enoate (**15b**)

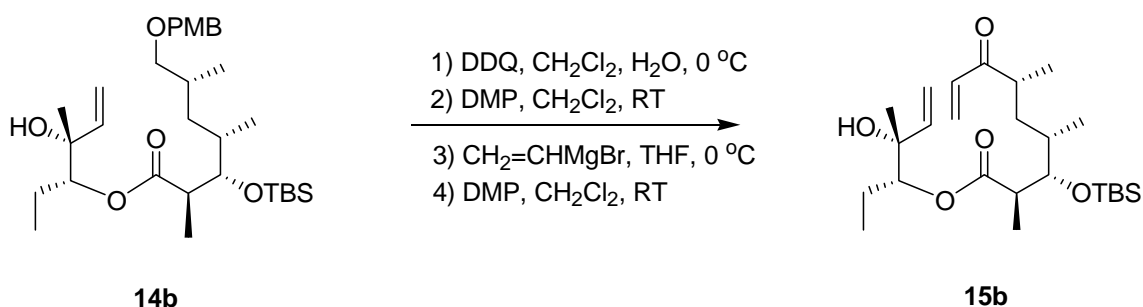

To a stirred solution of ester **14b** (54 mg, 0.098 mmol) in H<sub>2</sub>O (0.3 mL) and CH<sub>2</sub>Cl<sub>2</sub> (3 mL) was added the DDQ (45 mg, 0.196 mmol) at 0 °C. After 2.5 h, the reaction mixture was diluted with CH<sub>2</sub>Cl<sub>2</sub> (5 mL), then to this mixture was added aqueous saturated NaHCO<sub>3</sub> (5 mL). The layers were then separated and the aqueous layer was extracted with CH<sub>2</sub>Cl<sub>2</sub> (3 × 5 mL). The combined organic layers were washed with saturated aqueous NaHCO<sub>3</sub> (5 mL), water (5 mL), and dried (MgSO<sub>4</sub>). After being concentrated, purification of the residue by flash chromatography (hexane:EtOAc = 3:1) afforded the desired primary alcohol (39 mg, 93%) as a colorless oil:  $[\alpha]_D^{26.6}$  21.4 (*c* 1.09, CHCl<sub>3</sub>); IR (film): 3374.8, 2929.3, 1731.8, 1461.8, 1375.0, 1253.5, 1176.4, 1057.8, 836.0, 774.3 cm<sup>-1</sup>; <sup>1</sup>H NMR (300 MHz, CDCl<sub>3</sub>): δ 0.08 (s, 6H), 0.90 (m, 21H), 1.19 (d, *J* = 7.1 Hz, 3H), 1.24 (s, 3H), 1.61 (m, 6H), 2.22 (dddd, *J* = 14.3, 7.1, 7.1, 7.1 Hz, 1H), 3.42 (ddd, *J* = 45.6, 10.8, 10.8 Hz, 2H), 3.86 (dd, *J* = 7.3, 2.2 Hz, 1H), 4.79 (dd, *J* = 10.2, 2.5 Hz, 1H), 5.13 (d, *J* = 10.7 Hz, 1H), 5.33 (d, *J* = 17.3 Hz, 1H), 5.91 (dd, *J* = 17.3, 10.7 Hz, 1H); <sup>13</sup>C NMR (75 MHz, CDCl<sub>3</sub>): δ 176.8, 142.4, 113.9, 80.1, 75.9, 75.0, 66.9, 42.8, 35.9, 34.6, 32.6, 29.7, 26.0, 22.7, 22.3, 18.4, 18.0, 17.1, 15.7, 10.7, -4.0, -4.0; HRMS: *m/z* calcd for C<sub>23</sub>H<sub>47</sub>O<sub>5</sub>Si (M+H)<sup>+</sup>: 431.3193, found: 431.3197.

To a solution of the primary alcohol (35.0 mg, 0.081 mmol) obtained as described in the previous procedure and CH<sub>2</sub>Cl<sub>2</sub> (4 mL) was added Dess-Martin periodinane (68.9 mg, 0.162 mmol) at 0 °C. The resulting solution was stirred for 1.5 h and was diluted with CH<sub>2</sub>Cl<sub>2</sub> (10 mL). After the reaction was completed, aqueous saturated NaHCO<sub>3</sub> (10 mL) and aqueous saturated Na<sub>2</sub>S<sub>2</sub>O<sub>3</sub> (5 mL) were added. The resulting mixture was stirred and the organic layer was extracted and washed with saturated aqueous NaHCO<sub>3</sub> (10 mL), water (10 mL), dried (MgSO<sub>4</sub>), and concentrated. Purification of the residue by flash chromatography (hexane:EtOAc = 5:1) afforded the desired aldehyde (27 mg, 79%): <sup>1</sup>H NMR (300 MHz, CDCl<sub>3</sub>): δ 0.07 (s, 6H), 0.88 (m, 3H), 0.90 (s, 9H), 0.93 (d, *J* = 6.9 Hz, 3H), 1.11 (d, *J* = 7.0 Hz, 3H), 1.20 (d, *J* = 7.1 Hz, 3H), 1.25 (s, 3H), 1.63 (m, 3H), 1.86 (ddd, *J* = 13.8, 9.5, 3.7 Hz, 1H), 2.43 (m, 2H), 2.72 (dddd, *J* = 14.5, 7.3, 7.3, 7.3 Hz, 1H), 3.85 (dd, *J* = 7.8, 2.3 Hz, 1H), 4.80 (dd, *J* = 10.1, 2.8 Hz, 1H), 5.11 (d, *J* = 11.4 Hz, 1H), 5.32 (dd, *J* = 17.3 Hz, 1H), 5.90 (dd, *J* = 17.3, 10.8 Hz, 1H), 9.56 (d, *J* = 2.2 Hz, 1H); <sup>13</sup>C NMR (75 MHz, CDCl<sub>3</sub>): δ 205.8, 176.0, 142.5, 113.7, 80.1, 76.4, 75.0, 44.1, 43.4, 36.2, 32.3, 26.1, 22.8, 22.5, 18.4, 17.2, 15.5, 14.8, 10.6, -3.9, -3.9.

To a stirred solution of the aldehyde (27 mg, 0.063 mmol) prepared as described in the previous procedure and THF (5 ml) was added vinylmagnesium bromide (1 M, 94 μL, 0.094 mmol) at 0 °C. After stirred for 1 h, the reaction mixture was diluted with Et<sub>2</sub>O (5 mL) and saturated aqueous NH<sub>4</sub>Cl solution (5 mL). The organic layer was separated, and the aqueous layer was

extracted with ether (3 × 5 mL). The organic solutions were combined, dried (MgSO<sub>4</sub>), and concentrated. Purification of the residue by flash chromatography (hexane:EtOAc = 3:1) afforded the desired vinyl alcohol (22.7 mg, 79%) as a colorless oil.

To a stirred solution of the alcohol (22.7 mg, 0.050 mmol), which was prepared as described in the previous procedure, in CH<sub>2</sub>Cl<sub>2</sub> (3 ml) was added Dess-Martin periodinane (42 mg, 0.099 mmol) at 0 °C. The resulting solution was stirred for 2 h and diluted with CH<sub>2</sub>Cl<sub>2</sub> (5 mL). After the reaction was completed, aqueous saturated NaHCO<sub>3</sub> (10 mL) and aqueous saturated Na<sub>2</sub>S<sub>2</sub>O<sub>3</sub> (5 mL) were added. The resulting mixture was stirred and the organic layer was separated and washed with saturated aqueous NaHCO<sub>3</sub> (5 mL), water (5 mL), and finally dried (MgSO<sub>4</sub>). Concentration followed by purification of the residue by flash chromatography (hexane:EtOAc = 10:1) afforded the desired vinylketone **15b** as a colorless oil (22 mg, 97%): [α]<sub>D</sub><sup>26.8</sup> 16.5 (c 1.79, CHCl<sub>3</sub>); IR (film) : 3486.7, 2928.4, 2856.1, 1730.8, 1612.2, 1461.8, 1377.9, 1255.4, 1174.4, 1055.8, 837.0, 775.2 cm<sup>-1</sup>; <sup>1</sup>H NMR (300 MHz, CDCl<sub>3</sub>): δ 0.06 (s, 6H), 0.88 (m, 3H), 0.90 (s, 9H), 1.12 (d, *J* = 7.1 Hz, 3H), 1.20 (d, *J* = 7.2 Hz, 3H), 1.25 (m, 3H), 1.29 (s, 3H), 1.38 (m, 2H), 1.63 (m, 3H), 1.93 (m, 3H), 2.84 (m, 1H), 2.94 (m, 1H), 3.18 (s, 1H), 3.81 (d, *J* = 8.2 Hz, 1H), 4.81 (dd, *J* = 9.8, 2.7 Hz, 1H), 5.06 (d, *J* = 10.8 Hz, 1H), 5.27 (d, *J* = 17.3 Hz, 1H), 5.87 (m, 2H), 6.37 (m, 2H); <sup>13</sup>C NMR (75 MHz, CDCl<sub>3</sub>): δ 205.1, 176.3, 142.7, 135.3, 128.9, 113.6, 80.2, 76.7, 74.7, 43.3, 40.8, 36.2, 33.8, 29.7, 26.1, 22.6, 18.8, 18.4, 17.6, 15.8, 10.7, -3.8, -3.8.; HRMS: *m/z* calcd for C<sub>25</sub>H<sub>47</sub>O<sub>5</sub>Si(M+H)<sup>+</sup>, 455.3193, found: 455.3196.

(*E*)-(3*R*,4*S*,5*S*,7*R*,11*R*,12*R*)-4-(*tert*-Butyldimethylsilyloxy)-12-ethyl-3,5,7,11-tetramethyloxacyclododec-9-ene-2,8-dione (**16b**)

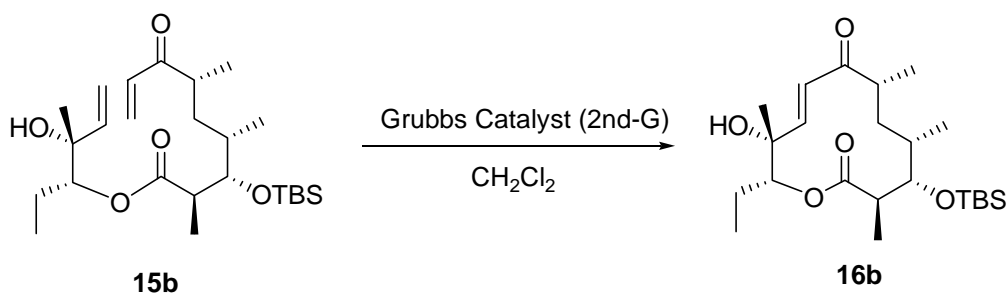

A flame-dried round-bottomed flask was charged with a solution of vinylketone **15b** (4.7 mg, 0.0097 mol) in CH<sub>2</sub>Cl<sub>2</sub> (3 mL). Grubbs Catalyst (2nd-Generation) (0.4 mg, 0.48 μmol) was subsequently added as a solid, producing a light brown solution, which was stirred for 12 h at room temperature. The mixture was then concentrated to give a dark brown oil. Purification of this residue by flash chromatography (hexane:EtOAc = 5:1) afforded the lactone **16b** (3.5 mg, 85%) as a white solid: mp 194.0~196.0 °C; [α]<sub>D</sub><sup>26.4</sup> 73.8 (c 1.45, CHCl<sub>3</sub>); IR (film): 3397.0,

2969.8, 1727.9, 1681.6, 1630.5, 1461.8, 1251.6, 1088.6, 1-56.8, 973.9, 836.0, 774.3 $\text{cm}^{-1}$ ;  $^1\text{H}$  NMR (300 MHz,  $\text{CDCl}_3$ ):  $\delta$  0.07 (d,  $J = 3.1$  Hz, 6H), 0.89 (m, 3H), 0.90 (s, 9H) 0.94 (d,  $J = 7.0$  Hz, 3H), 1.23 (m, 6H), 1.34 (s, 3H), 1.65 (m, 1H), 1.78 (m, 2H), 1.98 (s, 1H), 2.53 (m, 1H), 2.70 (m, 1H), 3.57 (d,  $J = 10.0$  Hz, 1H), 4.83 (dd,  $J = 8.7, 5.1$  Hz, 1H), 6.46 (d,  $J = 15.4$  Hz, 1H), 6.67 (d,  $J = 15.3$  Hz, 1H);  $^{13}\text{C}$  NMR (75 MHz,  $\text{CDCl}_3$ ):  $\delta$  205.2, 176.0, 147.9, 124.7, 79.0, 76.7, 75.4, 45.1, 44.3, 34.2, 33.5, 26.2, 23.3, 20.5, 18.5, 18.4, 17.5, 17.4, 10.0, -3.1, -3.4; HRMS:  $m/z$  calcd for  $\text{C}_{23}\text{H}_{43}\text{O}_5\text{Si}(\text{M}+\text{H})^+$ , 427.2880, found: 427.2882.

*epi*-Methynolide (**2b**)

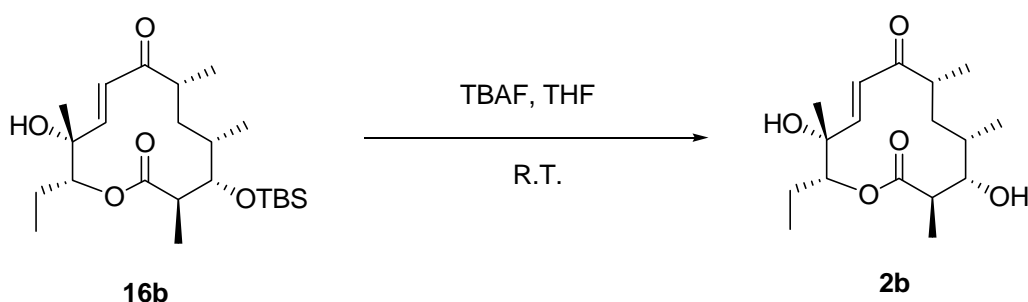

To a stirred solution of lactone **16b** (3.5 mg, 0.0082 mmol) in dry THF (1 mL) at room temperature was added 1.0 M TBAF (80  $\mu\text{L}$ , 0.082 mmol) via a syringe. After 2.5 h, the reaction mixture was concentrated. Purification by flash chromatography (hexane:EtOAc = 1:2) afforded *epi*-methynolide (**2b**) (2.0 mg, 78%) as a white solid: mp 163.5~166.0  $^{\circ}\text{C}$ ;  $[\alpha]_{\text{D}}^{26.4}$  74.7 ( $c$  0.20,  $\text{CHCl}_3$ ); IR (film): 3446.2, 2969.8, 2936.1, 1707.7, 1686.4, 1632.5, 1458.9, 1375.0, 1312.3, 1153.2, 1080.9, 994.1 $\text{cm}^{-1}$ ;  $^1\text{H}$  NMR (300 MHz,  $\text{CDCl}_3$ ):  $\delta$  0.91 (t,  $J = 7.4$  Hz, 3H), 1.01 (d,  $J = 6.2$  Hz, 3H), 1.22 (d,  $J = 7.0$  Hz, 3H), 1.33 (d,  $J = 7.0$  Hz, 3H), 1.37 (s, 3H), 1.32-1.52 (m, 2H), 1.48-1.68 (m, 2H), 1.74-1.84 (m, 2H), 1.95 (s, 1H), 2.56 (ddq,  $J = 7.1, 6.9, 3.6$  Hz, 1H), 2.67 (dq,  $J = 10.4, 6.8$  Hz, 1H), 3.57 (dd,  $J = 10.4, 5.6$  Hz, 1H), 4.85 (dd,  $J = 8.3, 5.7$  Hz, 1H), 6.46 (d,  $J = 15.4$  Hz, 1H), 6.67 (d,  $J = 15.4$  Hz, 1H);  $^{13}\text{C}$  NMR (75 MHz,  $\text{CDCl}_3$ ):  $\delta$  204.9, 174.4, 148.0, 124.6, 77.9, 76.6, 75.4, 45.2, 43.4, 33.2, 33.1, 20.4, 19.3, 17.4, 6.3, 16.6, 10.0; HRMS:  $m/z$  calcd for  $\text{C}_{17}\text{H}_{28}\text{O}_5$ : 312.1937, found: 312.1945.

Methyl 2,3-anhydro-4,6-dideoxy- $\alpha$ -D-ribo-hexopyranoside (**18**)

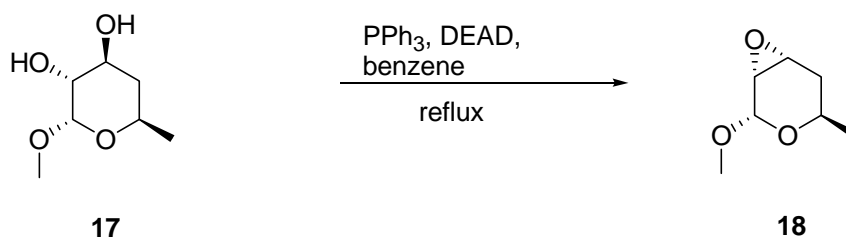

To a solution of diol **17** (1.79 mg, 11.04 mmol) in benzene (30 mL) at room temperature were added PPh<sub>3</sub> (4.34 g, 16.56 mmol) and DEAD (40% in toluene, 7.2 mL, 16.56 mmol). The resulting solution was stirred for 30 min at room temperature before it was warmed to 100 °C. After additional stirring for 16 h at 100 °C, the solution was cooled to room temperature. After 30 min, the reaction mixture benzene was evaporated and concentrated. Purification of the residue by flash chromatography (pentane:Et<sub>2</sub>O=1:1) afforded the epoxide **18** (1.41 mg, 89 %) as a colorless oil:  $[\alpha]_D^{25.5}$  74.2 (*c* 0.80, CHCl<sub>3</sub>); IR (film): 2974.6, 1445.4, 1394.3, 1258.3, 1192.8, 1160.9, 1132.0, 1069.3, 1029.8, 981.6, 945.6 cm<sup>-1</sup>; <sup>1</sup>H NMR (300 MHz, CDCl<sub>3</sub>): δ 1.03 (d, *J* = 8.9 Hz, 3H), 1.48 (dd, *J* = 14.5, 11.1 Hz, 1H), 1.93 (d, *J* = 14.6 Hz, 1H), 3.22 (t, *J* = 3.6 Hz, 1H), 3.26 (s, 1H), 3.34 (s, 3H), 3.78 (m, 1H), 4.81 (d, *J* = 3.2 Hz, 1H); <sup>13</sup>C NMR (75 MHz, CDCl<sub>3</sub>): δ 95.3, 60.0, 55.0, 50.8, 50.5, 32.1, 20.4; HRMS: *m/z* calcd for C<sub>7</sub>H<sub>12</sub>O<sub>3</sub>, 144.0786, found: 144.0788.

#### Methyl α-D-desosaminide (**19**)

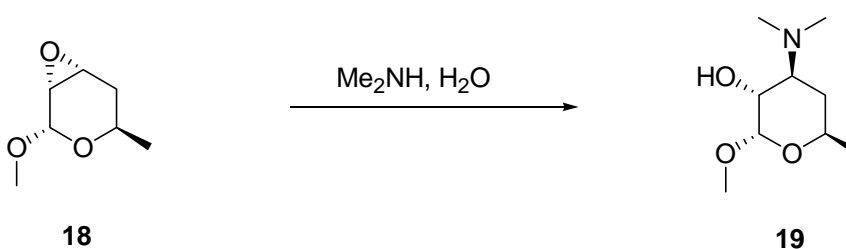

Epoxide **18** (1.41 mg, 9.78 mmol) was added to a solution of 40 % aqueous dimethylamine (30 mL) and the resulting mixture was stirred for 60 h at room temperature. After the mixture was concentrated under reduced pressure, purification of the residue by flash chromatography (CH<sub>2</sub>Cl<sub>2</sub>:MeOH=7:1) afforded the methyl α-D-desosaminide **19** (1.21 g, 65 %) as a colorless oil:  $[\alpha]_D^{25.7}$  160.6 (*c* 1.47, CHCl<sub>3</sub>); IR (film): 3463.5, 2935.1, 1456.0, 1382.7, 1277.6, 1202.4, 1099.2, 1052.9, 981.6, 940.1, 837.0 cm<sup>-1</sup>; <sup>1</sup>H NMR (300 MHz, CDCl<sub>3</sub>): δ 1.20 (d, *J* = 6.3 Hz, 3H), 1.25 (m, 1H), 1.72 (ddd, *J* = 5.8, 3.0, 3.0 Hz, 1H), 2.28 (s, 6H), 2.92 (ddd, *J* = 12.0, 3.8 Hz, 1H), 3.43 (s, 3H), 3.54 (dd, *J* = 10.6, 3.7 Hz, 1H), 3.90 (dddd, *J* = 6.2, 6.2, 6.2, 2.0 Hz, 1H), 4.85 (d, *J* = 3.6 Hz, 1H); <sup>13</sup>C NMR (75 MHz, CDCl<sub>3</sub>): δ 99.5, 68.5, 60.3, 54.9, 39.8, 29.0, 21.2;

HRMS:  $m/z$  calcd for  $C_9H_{19}NO_3$ , 189.1365, found: 189.1363.

Methyl 2-*O*-acetyl-3-dimethylamino-3,4,6-trideoxy- $\alpha$ -D-xylohexopyranoside (**20**)

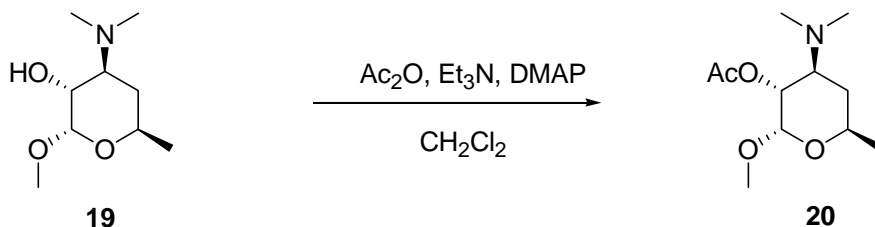

To a solution of Methyl  $\alpha$ -D-desosaminide **19** (1.00 mg, 5.28 mmol)  $CH_2Cl_2$  (10 mL) at 0 °C were added DMAP (322 mg, 2.64 mmol), triethylamine (2.2 mL, 15.8 mmol) and acetic anhydride (1.5 mL, 15.8 mmol). The resulting solution was stirred for 10 min at 0 °C before it was warmed to room temperature. After additional stirring for 1 h at room temperature and then to this was added a saturated aqueous  $NaHCO_3$  solution (20 mL). The organic layer was separated, and the aqueous layer was extracted with ether ( $3 \times 10$  mL). The organic solutions were combined, dried ( $MgSO_4$ ), and concentrated. Purification of the residue by flash chromatography (EtOAc:MeOH = 10:1) afforded **20** (990 mg, 72%) as a colorless oil:  $[\alpha]_D^{25.2}$  152.5 ( $c$  1.97,  $CHCl_3$ ); IR (film): 2940.9, 2782.8, 2133.9, 1744.3, 1455.0, 1372.1, 1246.8, 1128.2, 1042.3, 945.0, 923.7, 903.5, 870.7  $cm^{-1}$ ;  $^1H$  NMR (300 MHz,  $CDCl_3$ ):  $\delta$  1.02 (d,  $J = 6.3$  Hz, 3H), 1.19 (ddd,  $J = 12.2, 12.2, 12.2$  Hz, 1H), 1.61 (ddd,  $J = 13.0, 4.0, 2.2$  Hz, 1H), 1.93 (s, 3H), 2.10 (s, 6H), 2.95 (ddd,  $J = 12.0, 12.0, 4.2$  Hz, 1H), 3.20 (s, 3H), 3.74 (dddd,  $J = 12.5, 6.2, 6.2, 2.0$  Hz, 1H), 4.60 (d,  $J = 3.6$  Hz, 1H), 4.71 (dd,  $J = 11.0, 3.7$  Hz, 1H);  $^{13}C$  NMR (75 MHz,  $CDCl_3$ ):  $\delta$  170.0, 97.4, 70.3, 63.8, 57.3, 54.5, 40.1, 32.1, 20.7, 20.4; HRMS:  $m/z$  calcd for  $C_{11}H_{21}NO_4$ , 231.1471, found: 231.1470.

1, 2-Di-*O*-acetyl-D-desosamine (**21**)

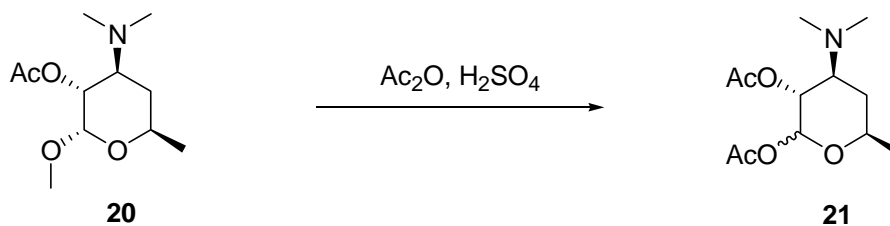

To a stirred solution of **20** (990 mg, 4.28 mmol) in acetic anhydride (6 mL) was added the

H<sub>2</sub>SO<sub>4</sub> solution [H<sub>2</sub>SO<sub>4</sub> (8 drops) in acetic anhydride (1 mL)] (0.5 mL) at 0 °C. The resulting solution was stirred for 10 min at 0 °C before it was warmed to room temperature. After additional stirring for 1 h at room temperature NaHCO<sub>3</sub> (300 mg) was added to the mixture. After 30 min, Et<sub>2</sub>O (20 mL) and a saturated aqueous NaHCO<sub>3</sub> solution (20 mL) were added to the mixture. The resulting mixture was stirred for 2 h at room temperature. The organic layer was separated, and the aqueous layer was extracted with ether (5 × 15 mL). The organic solutions were combined, dried (MgSO<sub>4</sub>), and concentrated. Purification of the residue by flash chromatography (EtOAc:MeOH = 10:1) afforded the desired product **21** ( $\alpha$ : $\beta$ =5:1, 810 mg, 74 %) as a colorless oil. IR (film): 2975.6, 1748.2, 1373.1, 1243.9, 1139.7, 1058.7, 1012.5, 925.7, 843.7 cm<sup>-1</sup>; major ( $\alpha$ ) <sup>1</sup>H NMR (300 MHz, CDCl<sub>3</sub>):  $\delta$  1.17 (d,  $J$  = 6.2 Hz, 3H), 1.37 (ddd,  $J$  = 12.0, 12.0, 12.0 Hz, 1H), 1.83 (ddd,  $J$  = 13.1, 3.7, 2.4 Hz, 1H), 2.00 (s, 3H), 2.09 (s, 3H), 2.26 (s, 6H), 3.12 (ddd,  $J$  = 11.5, 11.5, 4.0 Hz, 1H), 4.00 (m, 1H), 4.99 (dd,  $J$  = 11.1, 3.6 Hz, 1H), 6.18 (dd,  $J$  = 3.6 Hz, 1H); <sup>13</sup>C NMR (75 MHz, CDCl<sub>3</sub>):  $\delta$  170.2, 169.5, 90.6, 68.7, 67.1, 57.5, 40.1, 31.4, 21.0, 20.9; minor ( $\beta$ ) <sup>1</sup>H NMR (300 MHz, CDCl<sub>3</sub>):  $\delta$  1.47 (d,  $J$  = 6.1 Hz, 3H), 1.35 (m, 1H), 1.75 (m, 1H), 1.95 (s, 3H), 2.04 (s, 3H), 2.24 (s, 6H), 2.79 (ddd,  $J$  = 10.8, 10.8, 4.3 Hz, 1H), 3.68 (m, 1H), 4.89 (dd,  $J$  = 10.5, 8.0 Hz, 1H), 5.55 (d,  $J$  = 7.9 Hz, 1H); <sup>13</sup>C NMR (75 MHz, CDCl<sub>3</sub>):  $\delta$  169.0, 169.4, 93.5, 70.4, 69.6, 62.9, 40.4, 30.3, 21.4, 20.9; HRMS:  $m/z$  calcd for C<sub>12</sub>H<sub>21</sub>NO<sub>5</sub>, 259.1420, found: 259.1423.

#### 2-*O*-acetyl-D-desosamine (**22**)

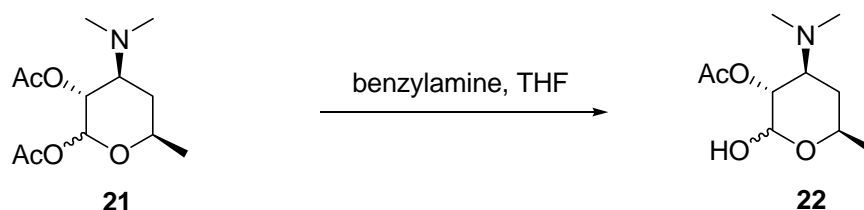

To a stirred solution of **21** (810 mg, 3.12 mmol) in dry THF (10 mL) at room temperature was added benzylamine (683  $\mu$ L, 6.24 mmol) via a syringe. After 18 h, the reaction mixture was concentrated. Purification by flash chromatography (CH<sub>2</sub>Cl<sub>2</sub>:MeOH= 7:1) afforded 2-*O*-acetyl-D-desosamine (**22**) ( $\alpha$ : $\beta$  = 0.7:1, 480 mg, 71%) as a colorless oil: major ( $\beta$ ) <sup>1</sup>H NMR (300 MHz, CDCl<sub>3</sub>):  $\delta$  1.28 (d,  $J$  = 6.2 Hz, 3H), 1.39 (m, 1H), 1.80 (m, 1H), 2.13 (s, 3H), 2.29 (s, 6H), 2.82 (ddd,  $J$  = 12.1, 10.5, 4.3 Hz, 1H), 3.62 (dddd,  $J$  = 12.2, 6.2, 6.2, 6.2, 2.0 Hz, 1H), 4.54 (d,  $J$  = 7.7 Hz, 1H), 4.71 (dd,  $J$  = 10.4, 7.7 Hz, 1H); minor ( $\alpha$ ) <sup>1</sup>H NMR (300 MHz, CDCl<sub>3</sub>):  $\delta$  1.20 (d,  $J$  = 6.2 Hz, 3H), 1.39 (m, 1H), 1.80 (m, 1H), 2.13 (s, 3H), 2.30 (s, 6H), 3.20 (ddd,  $J$  = 12.1, 12.1, 4.1 Hz, 1H), 4.18 (dddd,  $J$  = 12.7, 6.5, 6.5, 6.5, 2.4 Hz, 1H), 4.91 (dd,  $J$  = 11.1, 3.6 Hz, 1H),

5.32 (d,  $J = 3.5$  Hz, 1H);  $^{13}\text{C}$  NMR (75 MHz,  $\text{CDCl}_3$ ):  $\delta$  171.7, 170.6, 96.8, 91.0, 73.2, 70.8, 69.5, 64.4, 62.4, 57.1, 40.6, 40.5, 32.2, 31.5, 21.4, 21.1.



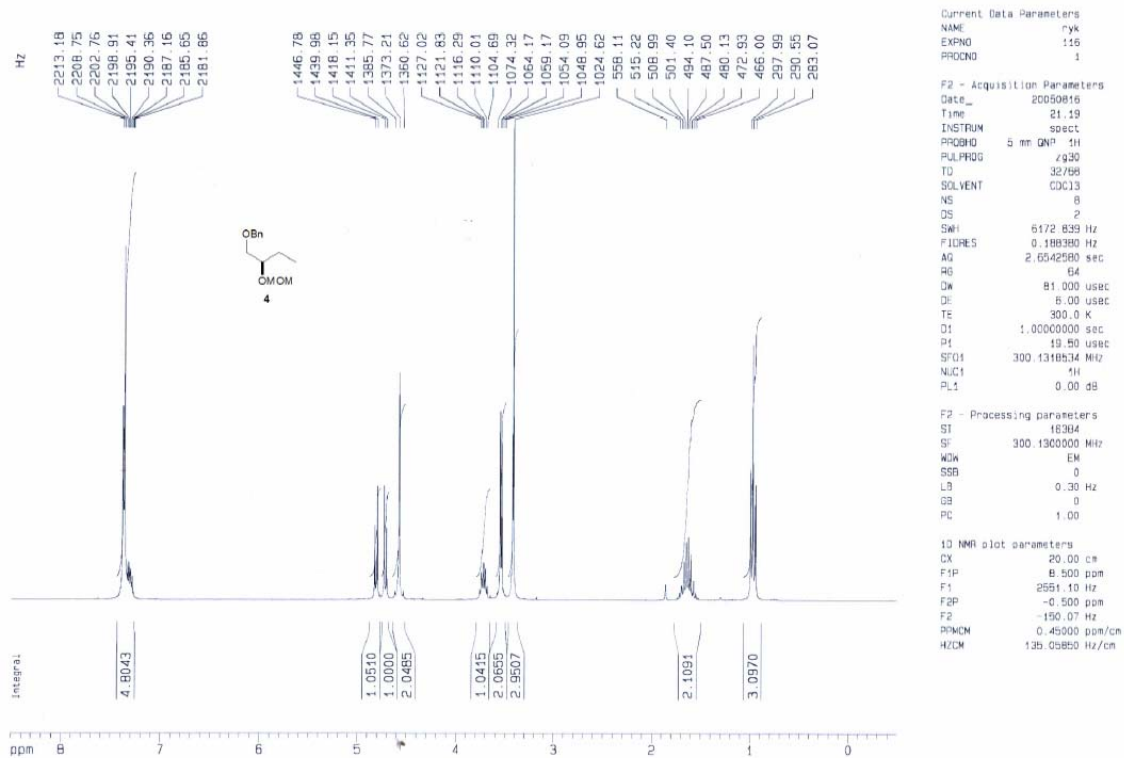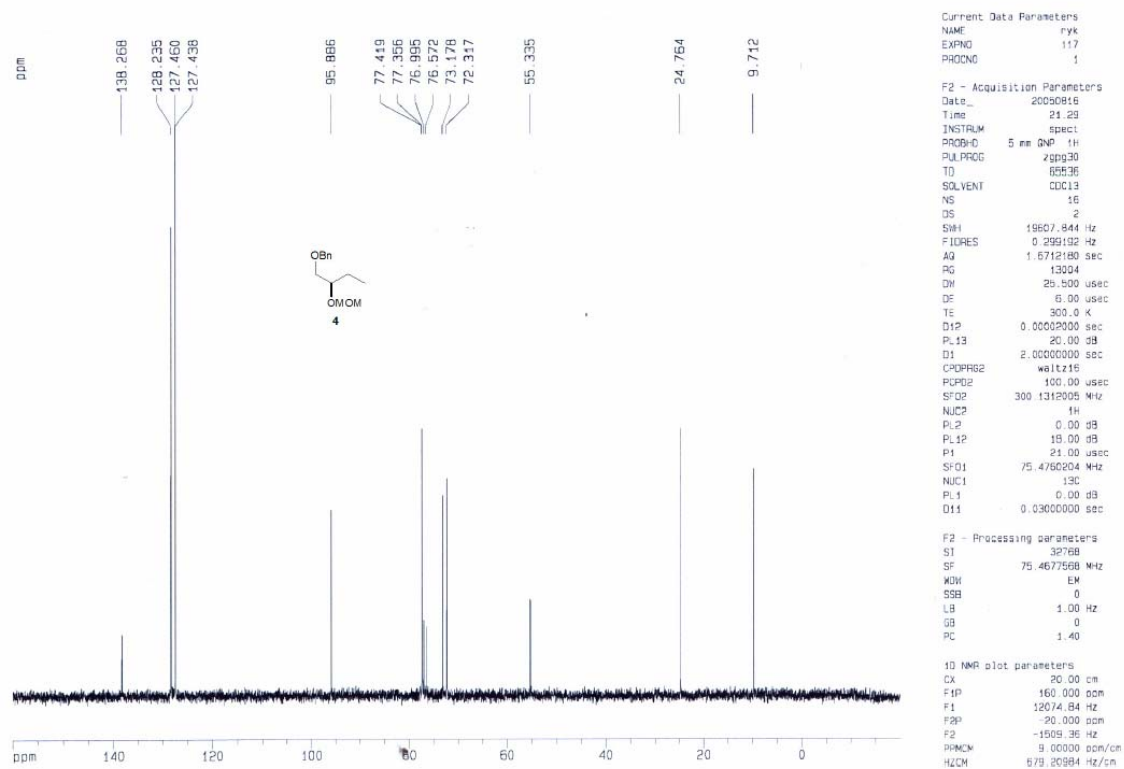

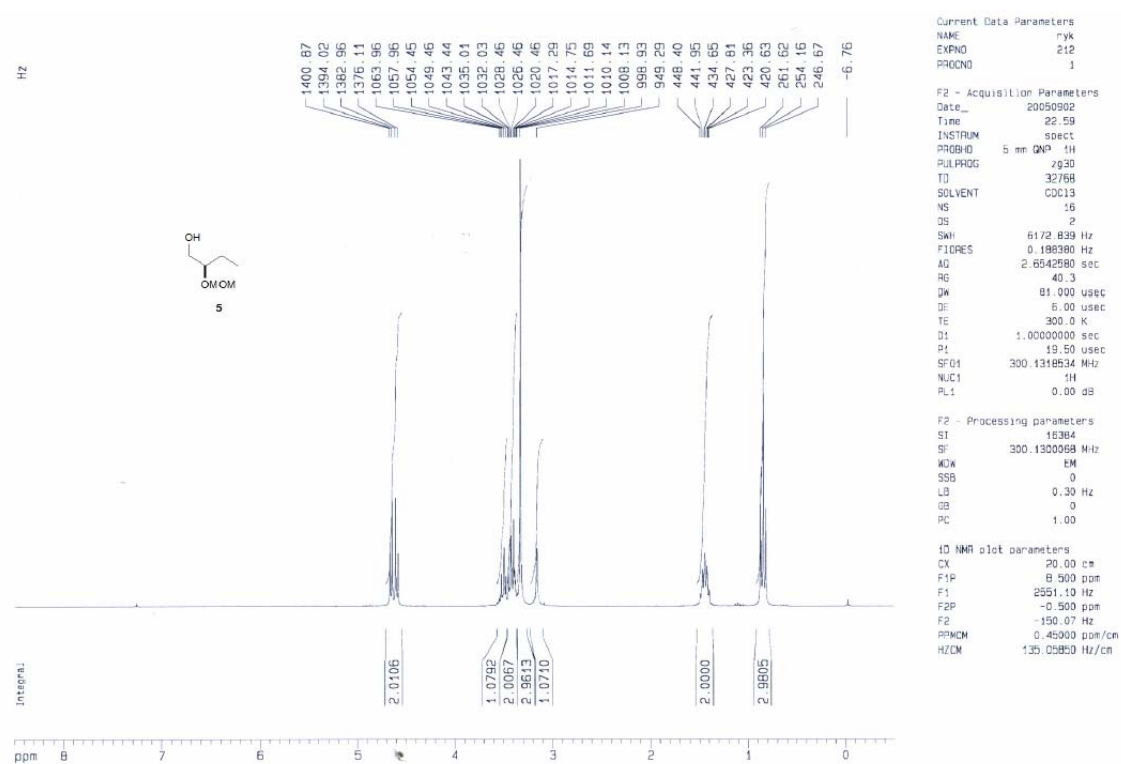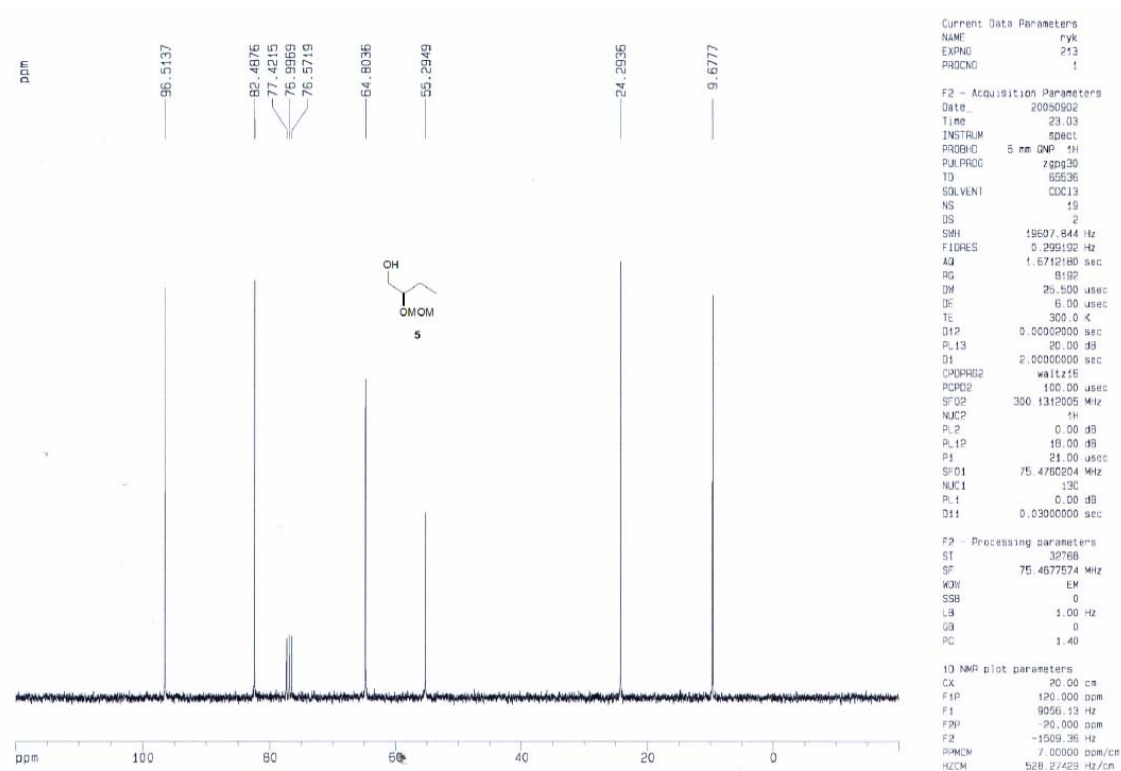

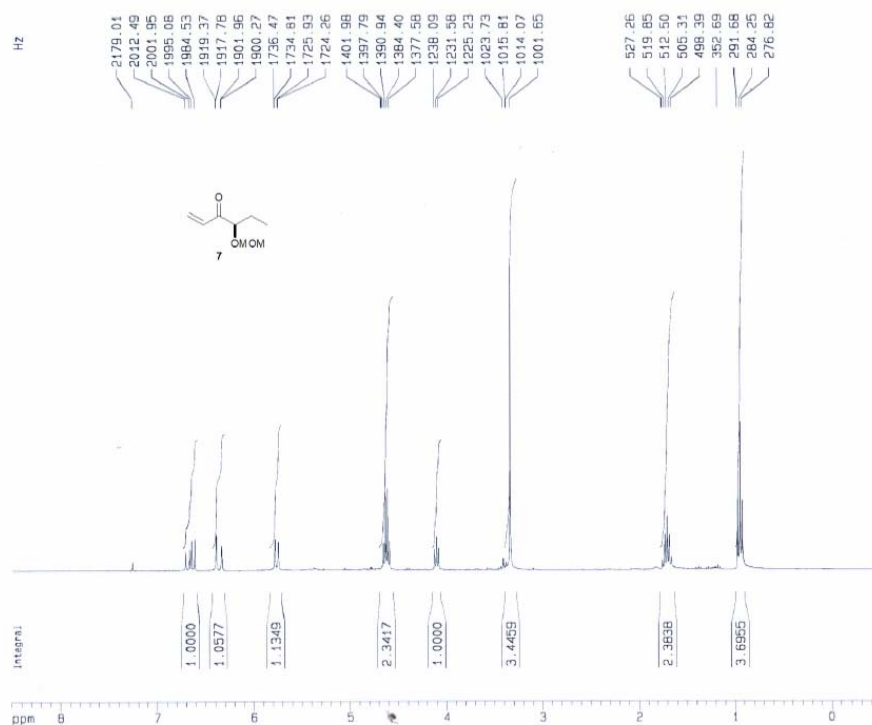

Current Data Parameters  
 NAME ryk  
 EXPNO 87  
 PROCNO 1

F2 - Acquisition Parameters  
 Date\_ 20050923  
 Time 22.24  
 INSTRUM spect  
 PROBHD 5 mm QNP 1H  
 PULPROG zg30  
 TD 32768  
 SOLVENT CDCl3  
 NS 16  
 DS 2  
 SWH 6172.839 Hz  
 FIDRES 0.188380 Hz  
 AQ 2.6542580 sec  
 RG 90.5  
 DW 81.000 usec  
 DE 6.00 usec  
 TE 300.0 K  
 D1 1.00000000 sec  
 P1 19.50 usec  
 SFO1 300.1318834 MHz  
 NUC1 1H  
 PL1 0.00 dB

F2 - Processing parameters  
 SI 16384  
 SF 300.1300068 MHz  
 MDX EM  
 SSB 0  
 LB 0.30 Hz  
 GB 0  
 PC 1.00

1D NMR plot parameters  
 CX 20.00 cm  
 F1P 8.500 ppm  
 F1 2551.10 Hz  
 F2P -0.500 ppm  
 F2 -150.07 Hz  
 PPMCH 0.45000 ppm/cm  
 HZCM 135.05650 Hz/cm

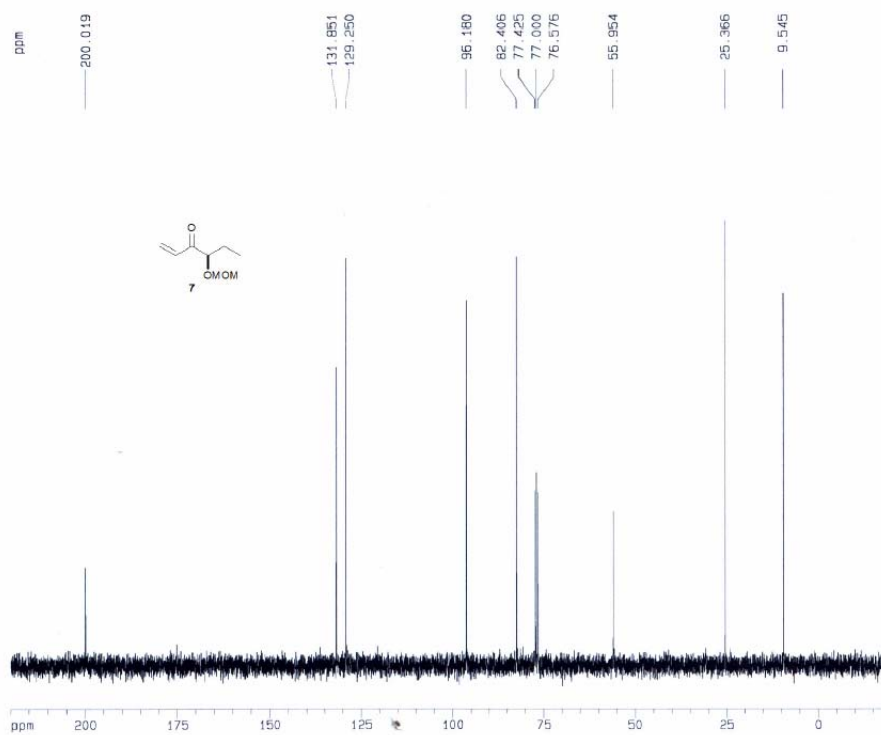

Current Data Parameters  
 NAME ryk  
 EXPNO 88  
 PROCNO 1

F2 - Acquisition Parameters  
 Date\_ 20050923  
 Time 22.30  
 INSTRUM spect  
 PROBHD 5 mm QNP 1H  
 PULPROG zgpg30  
 TD 65536  
 SOLVENT CDCl3  
 NS 46  
 DS 2  
 SWH 18607.844 Hz  
 FIDRES 0.259192 Hz  
 AQ 1.6712180 sec  
 RG 8192  
 DW 25.500 usec  
 DE 6.00 usec  
 TE 300.0 K  
 D1P 0.00000000 sec  
 P1D 26.00 usec  
 D1 2.00000000 sec  
 CPDPRG2 waltz16  
 PCPD2 100.00 usec  
 SFO2 300.1312005 MHz  
 NUC2 13C  
 PL2 0.00 dB  
 PLP 18.00 dB  
 P1 21.00 usec  
 SFO1 75.4750204 MHz  
 NUC1 13C  
 PL1 0.00 dB  
 D11 0.03000000 sec

F2 - Processing parameters  
 SI 32768  
 SF 75.4677514 MHz  
 MDX EM  
 SSB 0  
 LB 1.00 Hz  
 GB 0  
 PC 1.40

1D NMR plot parameters  
 CX 20.00 cm  
 F1P 220.000 ppm  
 F1 15802.90 Hz  
 F2P -20.000 ppm  
 F2 -1509.35 Hz  
 PPMCH 12.00000 ppm/cm  
 HZCM 905.61304 Hz/cm

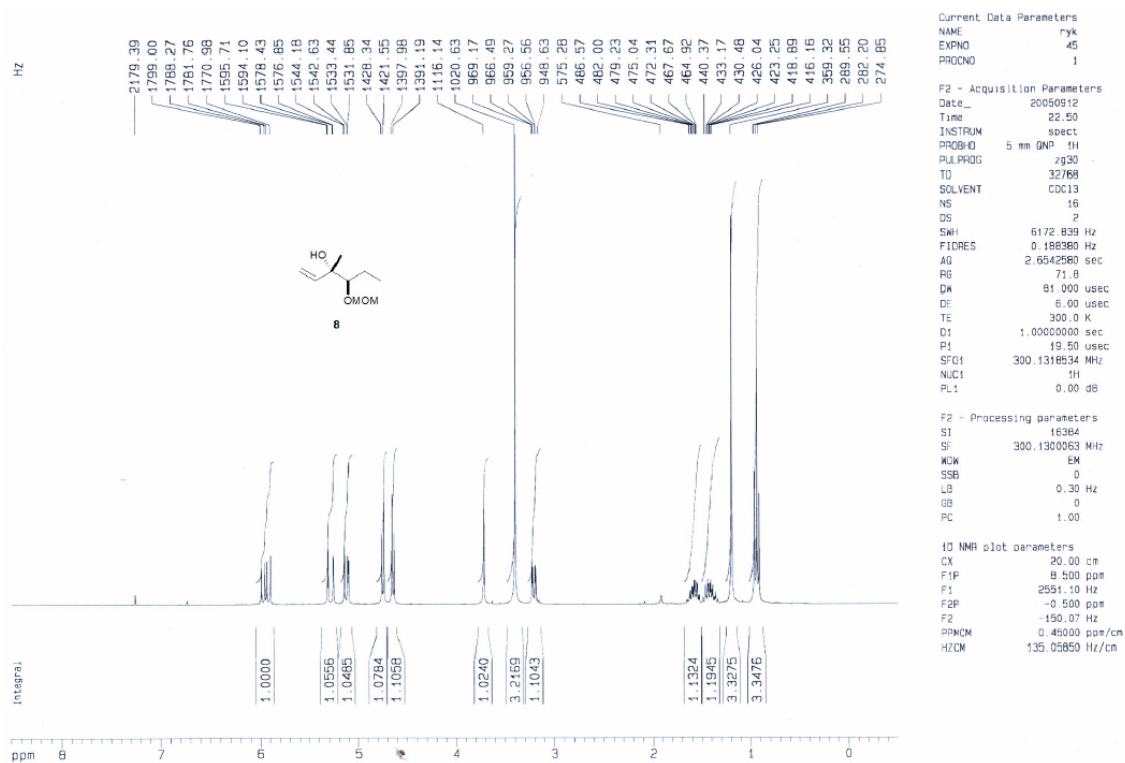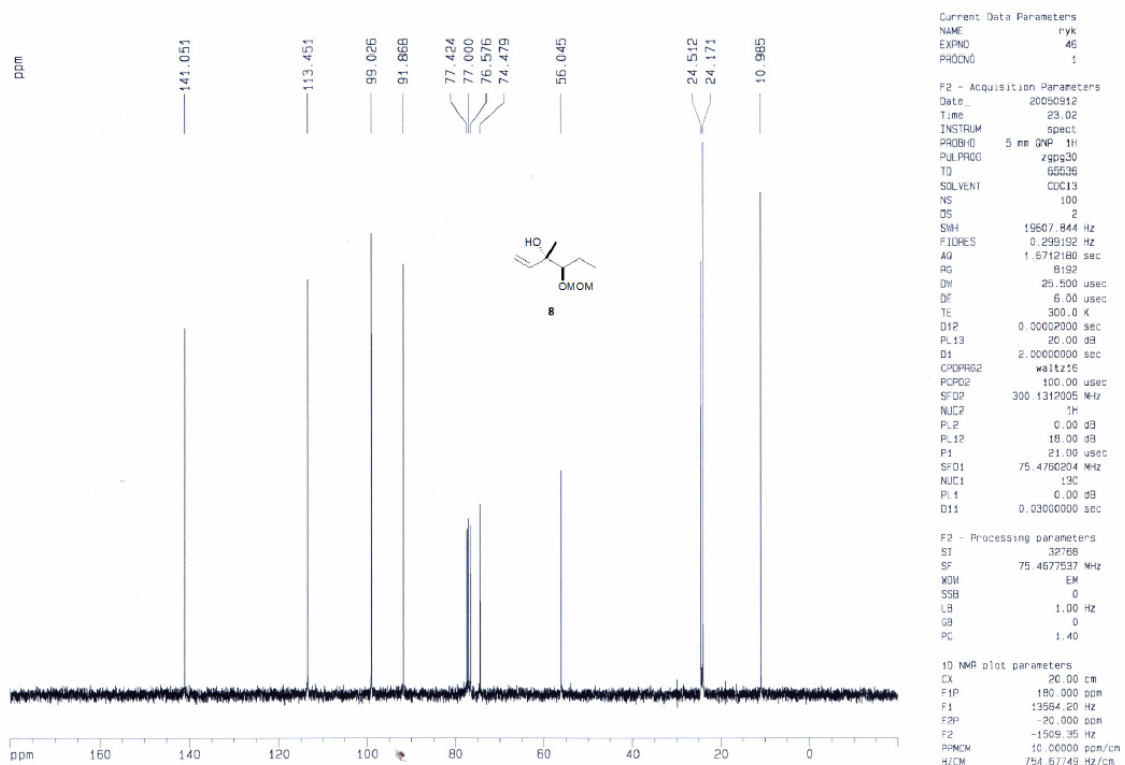

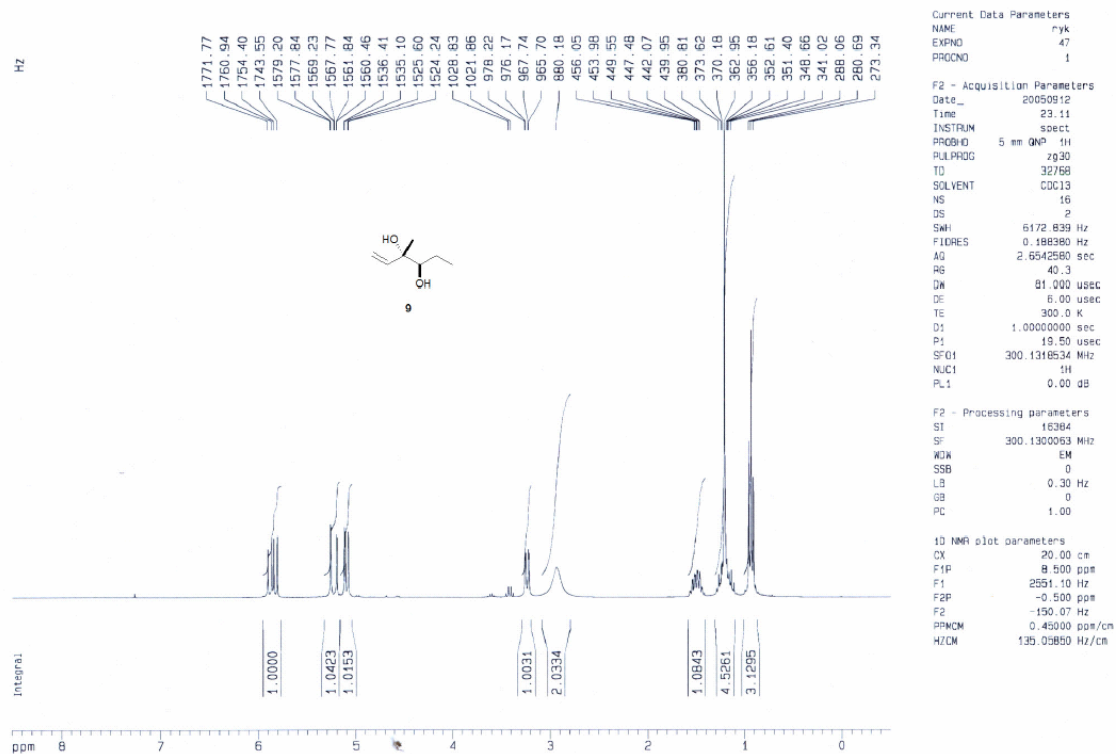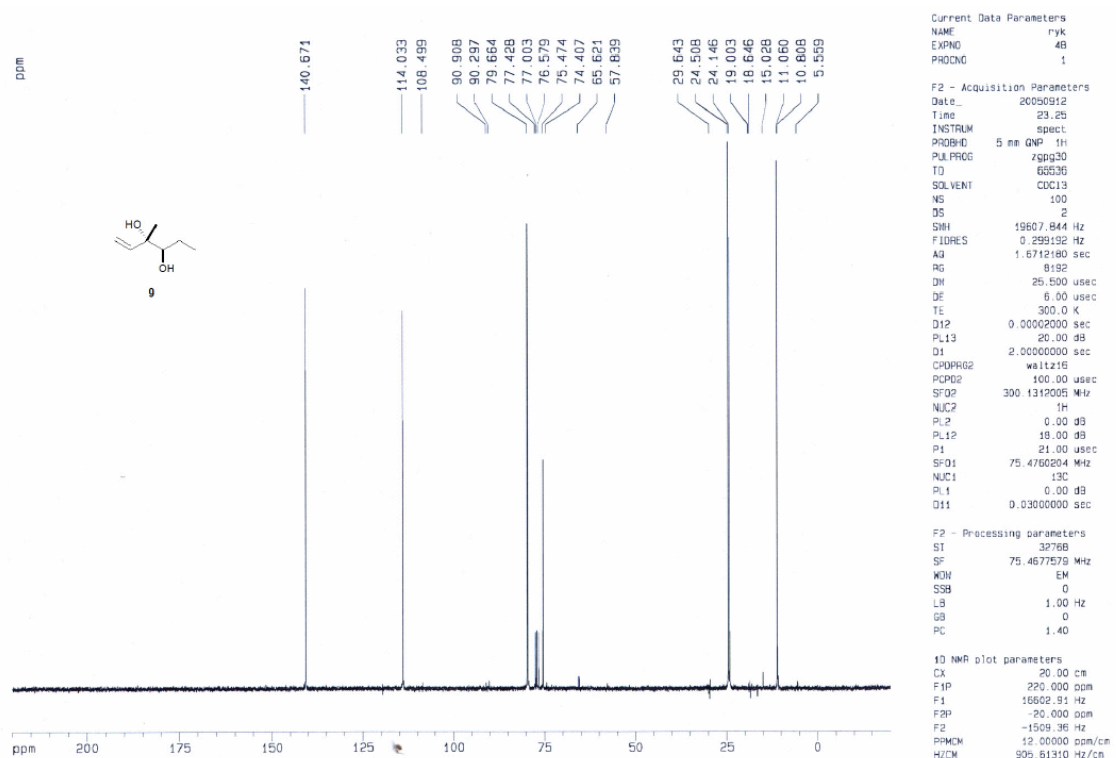

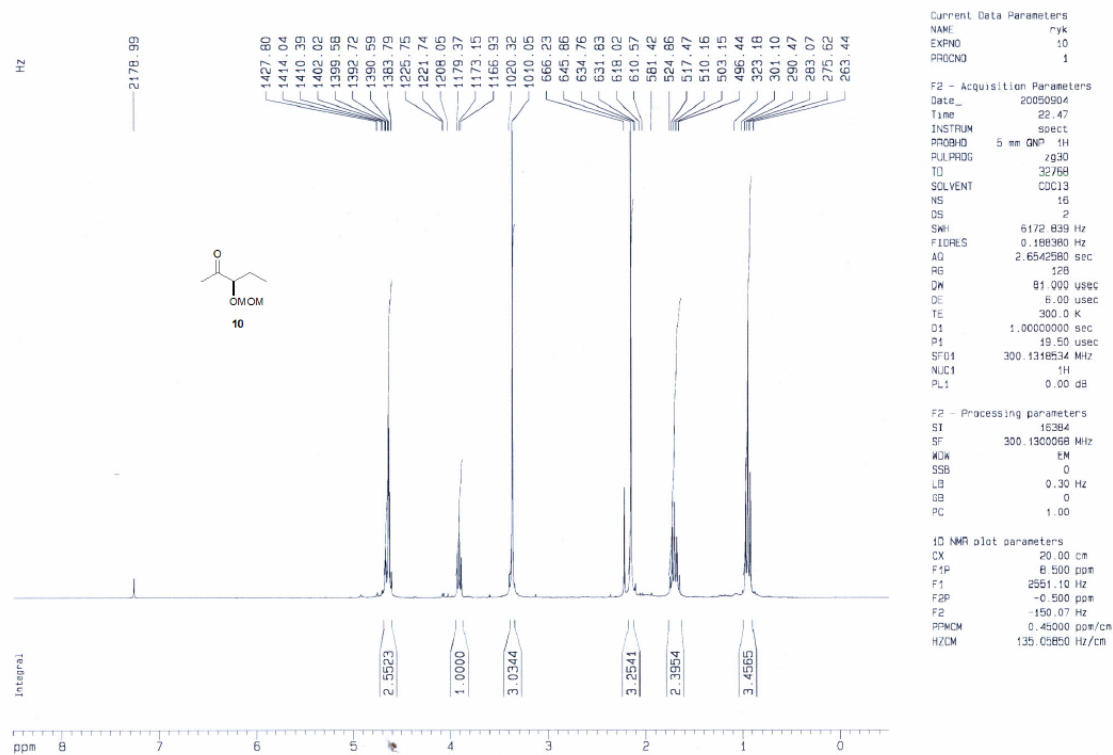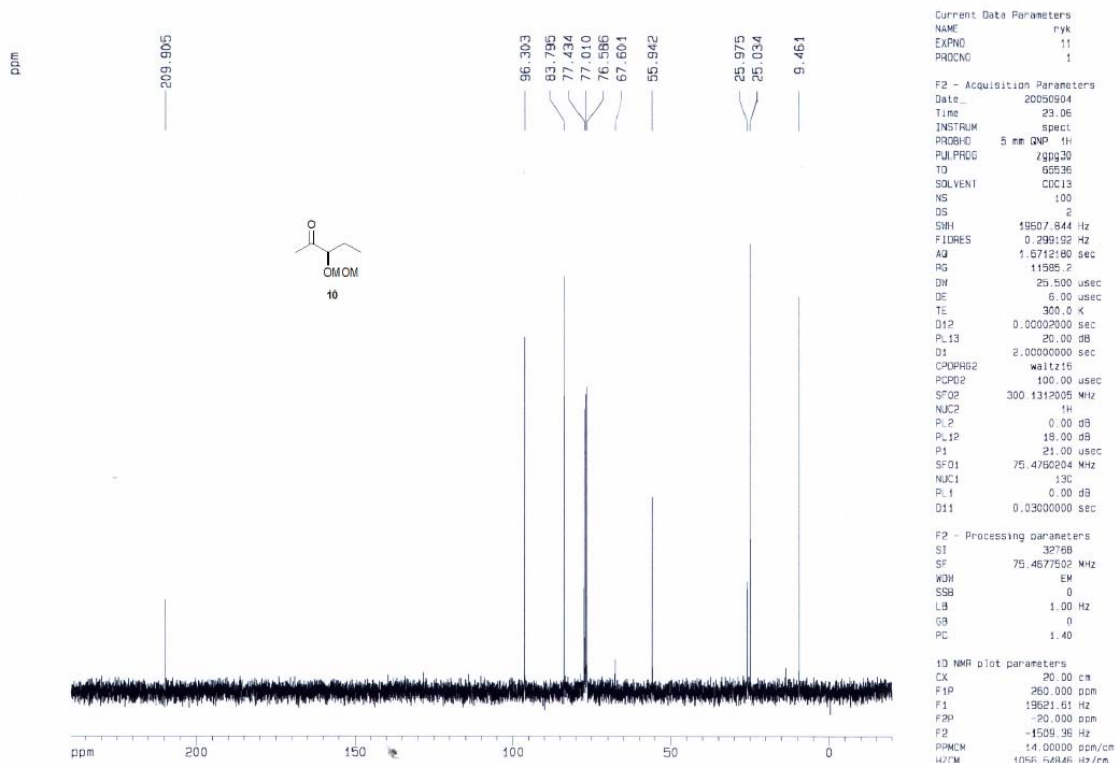

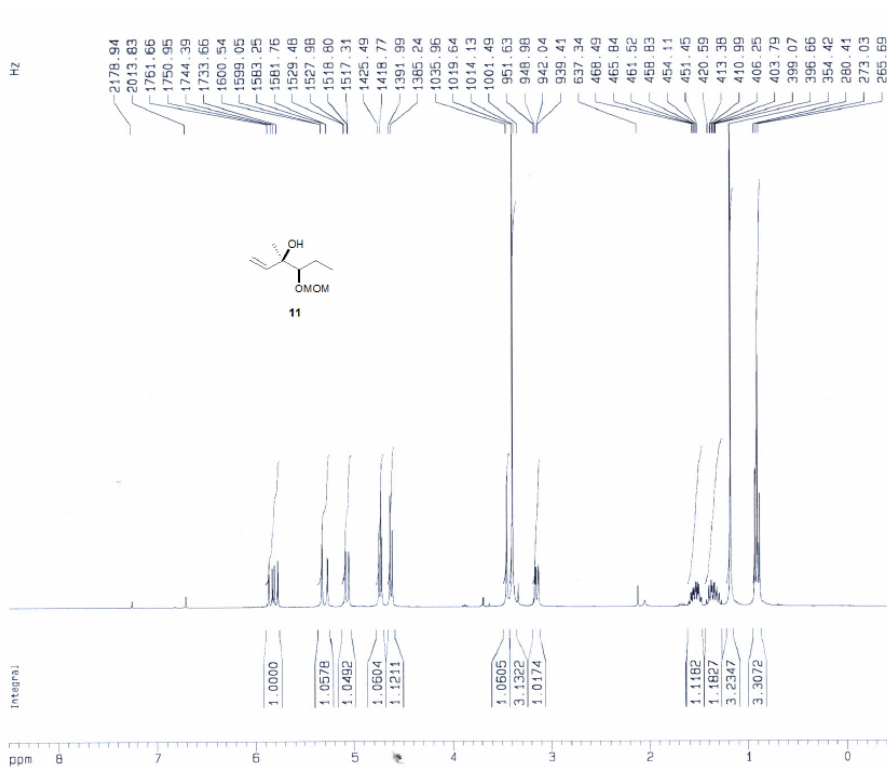

Current Data Parameters  
NAME ryk  
EXPNO 20  
PROCNO 1

F2 - Acquisition Parameters  
Date\_ 20050905  
Time 22.59  
INSTRUM spect  
PROBHD 5 mm GNP 1H  
PULPROG zg30  
TD 32768  
SOLVENT CDCl3  
NS 16  
DS 2  
SWH 6172.839 Hz  
FIDRES 0.188380 Hz  
AQ 2.6542560 sec  
RG 40.3  
DW 81.000 usec  
DE 6.00 usec  
TE 300.0 K  
D1 1.0000000 sec  
P1 13.50 usec  
SFO1 300.1318534 MHz  
NUC1 1H  
PL1 0.00 dB

F2 - Processing parameters  
SI 16384  
SF 300.1300068 MHz  
WDW EM  
SSB 0  
LB 0.30 Hz  
GB 0  
PC 1.00

1D NMR plot parameters  
CX 20.00 cm  
F1P 8.500 ppm  
F1 2551.10 Hz  
F2P -0.500 ppm  
F2 -150.07 Hz  
PRCM 0.45000 ppm/cm  
HZCM 135.05850 Hz/cm

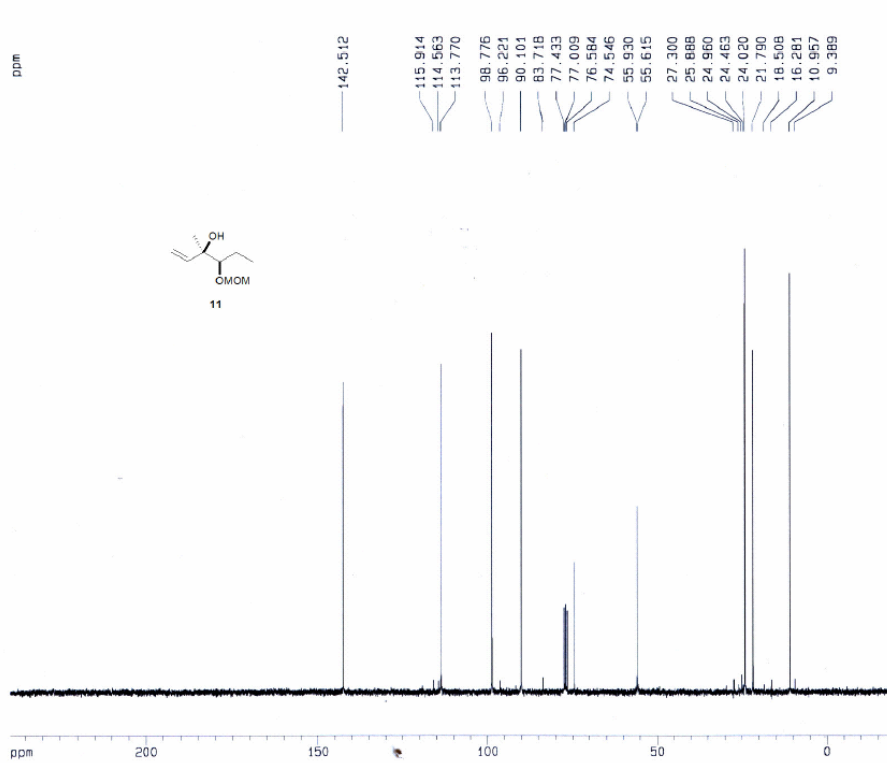

Current Data Parameters  
NAME ryk  
EXPNO 21  
PROCNO 1

F2 - Acquisition Parameters  
Date\_ 20050905  
Time 23.15  
INSTRUM spect  
PROBHD 5 mm GNP 1H  
PULPROG zgpg30  
TD 65536  
SOLVENT CDCl3  
NS 128  
DS 2  
SWH 19607.844 Hz  
FIDRES 0.299192 Hz  
AQ 1.6712180 sec  
RG 11585.2  
DW 25.500 usec  
DE 6.00 usec  
TE 300.0 K  
D1P 0.0000000 sec  
PL13 20.00 dB  
D1 2.0000000 sec  
COPRPG2 waitz16  
PCPRG2 100.00 usec  
SFO2 300.1312605 MHz  
NUC2 13C  
PL2 0.00 dB  
PL12 18.00 dB  
P1 21.00 usec  
SFO1 75.4760204 MHz  
NUC1 13C  
PL1 0.00 dB  
D11 0.0300000 sec

F2 - Processing parameters  
SI 32768  
SF 75.4677543 MHz  
WDW EM  
SSB 0  
LB 1.00 Hz  
GB 0  
PC 1.40

1D NMR plot parameters  
CX 20.00 cm  
F1P 240.000 ppm  
F1 18112.26 Hz  
F2P -20.000 ppm  
F2 -1509.36 Hz  
PRCM 13.00000 ppm/cm  
HZCM 981.08078 Hz/cm

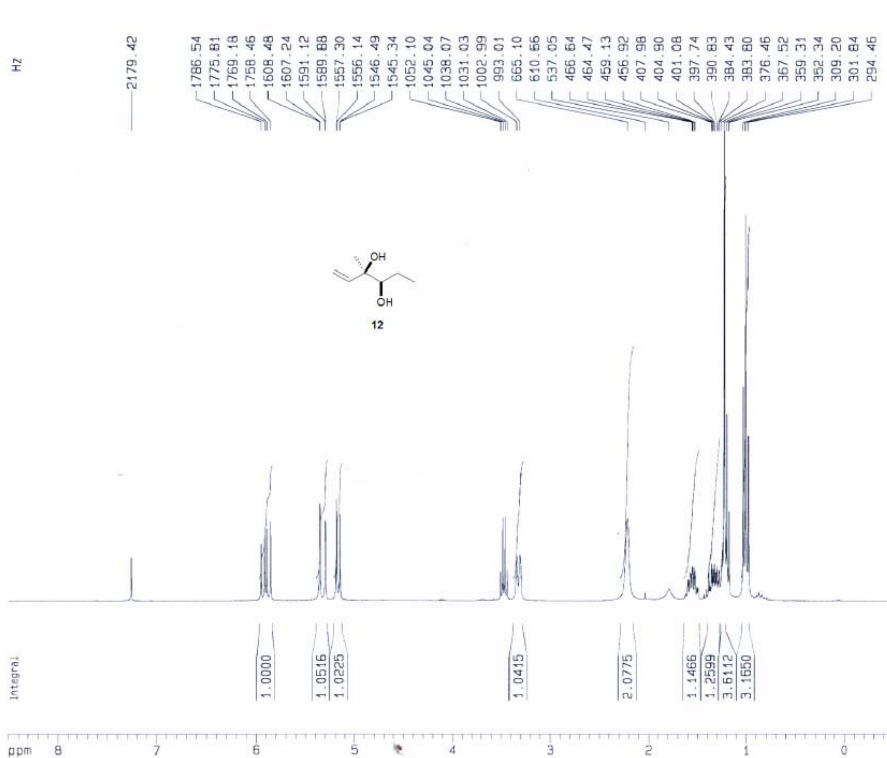

Current Data Parameters  
NAME ryk  
EXPNO 69  
PROCNO 1

F2 - Acquisition Parameters  
Date\_ 20050923  
Time 22.39  
INSTRUM spect  
PROBHD 5 mm GNP 1H  
PULPROG zg30  
TD 32768  
SOLVENT CDCl3  
NS 16  
DS 2  
SWH 6172.839 Hz  
FIDRES 0.188360 Hz  
AQ 2.6542560 sec  
RG 161  
Dw 81.000 USEC  
DE 6.00 USEC  
TE 300.0 K  
D1 1.0000000 sec  
P1 19.50 usec  
SFO1 300.1318534 MHz  
NUC1 1H  
PL1 0.00 dB

F2 - Processing parameters  
SI 16384  
SF 300.1300063 MHz  
WDW EM  
SSB 0  
LB 0.30 Hz  
GB 0  
PC 1.00

1D NMR plot parameters  
CX 20.00 cm  
F1P 8.500 ppm  
F1 2551.10 Hz  
F2P -0.500 ppm  
F2 -150.07 Hz  
PPMCM 0.45000 ppm/cm  
HZCM 135.05850 Hz/cm

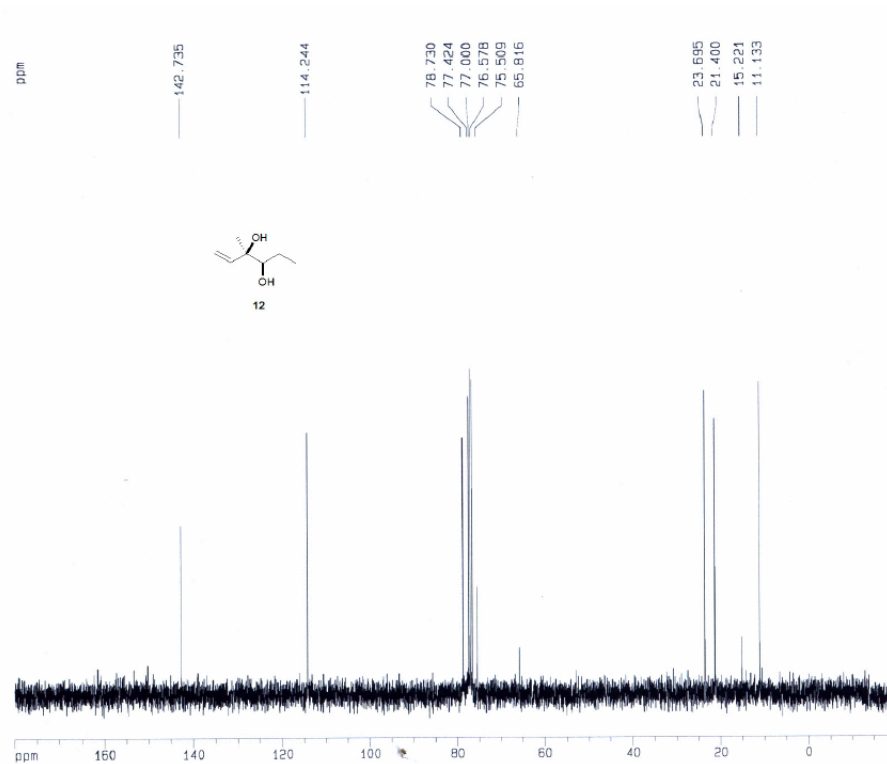

Current Data Parameters  
NAME ryk  
EXPNO 90  
PROCNO 1

F2 - Acquisition Parameters  
Date\_ 20050923  
Time 22.47  
INSTRUM spect  
PROBHD 5 mm GNP 1H  
PULPROG zgpg30  
TD 65536  
SOLVENT CDCl3  
NS 69  
DS 2  
SWH 19607.844 Hz  
FIDRES 0.299192 Hz  
AQ 1.6712190 sec  
RG 8192  
Dw 25.600 USEC  
DE 6.00 USEC  
TE 300.0 K  
D12 0.00002000 sec  
PL13 20.00 dB  
D1 2.0000000 sec  
CHOPRG2 waltz16  
PDR2 100.00 usec  
SFO2 300.1312905 MHz  
NUC2 13C  
PL2 0.00 dB  
PL12 18.00 dB  
P1 21.00 usec  
SFO1 75.4760204 MHz  
NUC1 13C  
R1 0.00 dB  
D11 0.03000000 sec

F2 - Processing parameters  
SI 32768  
SF 75.4677502 MHz  
WDW EM  
SSB 0  
LB 1.00 Hz  
GB 0  
PC 1.40

1D NMR plot parameters  
CX 20.00 cm  
F1P 180.000 ppm  
F1 13584.20 Hz  
F2P -20.000 ppm  
F2 -1509.35 Hz  
PPMCM 10.00000 ppm/cm  
HZCM 754.67749 Hz/cm



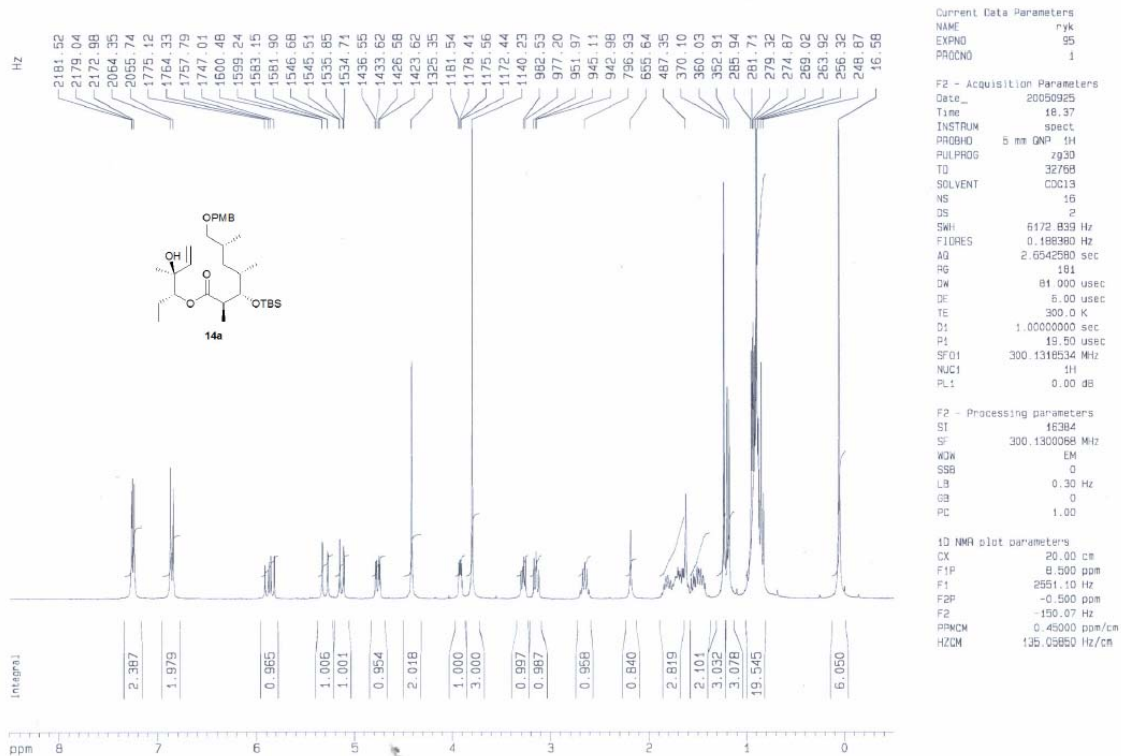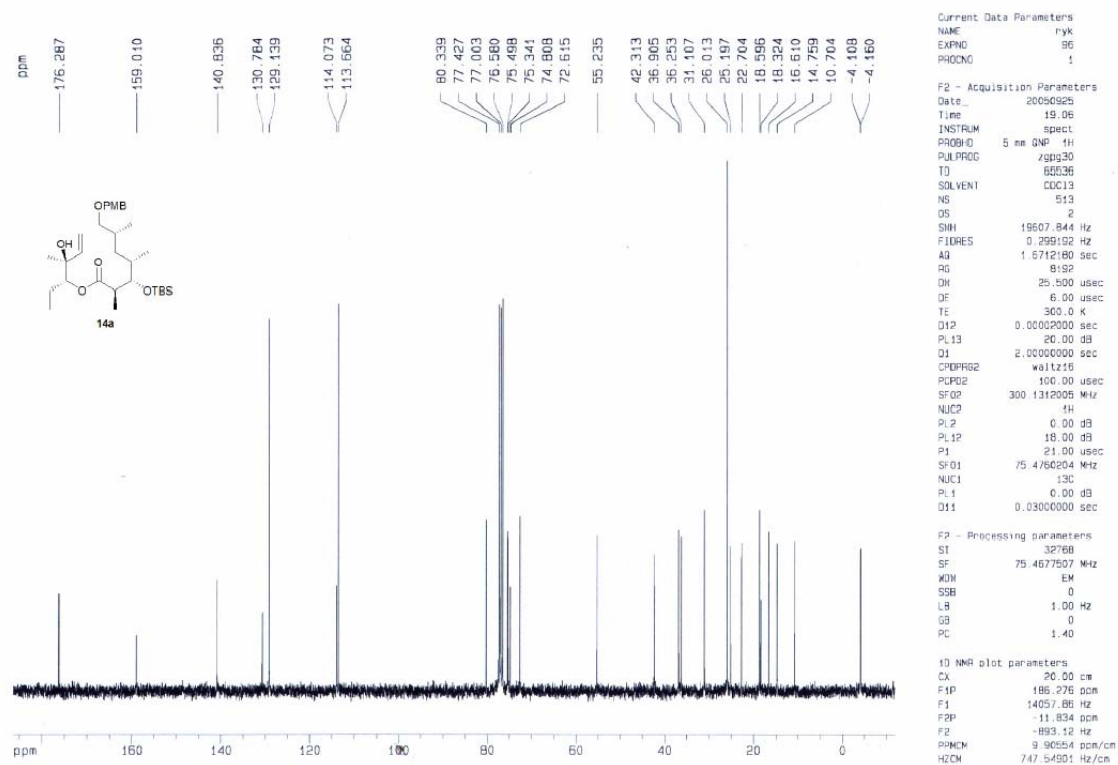

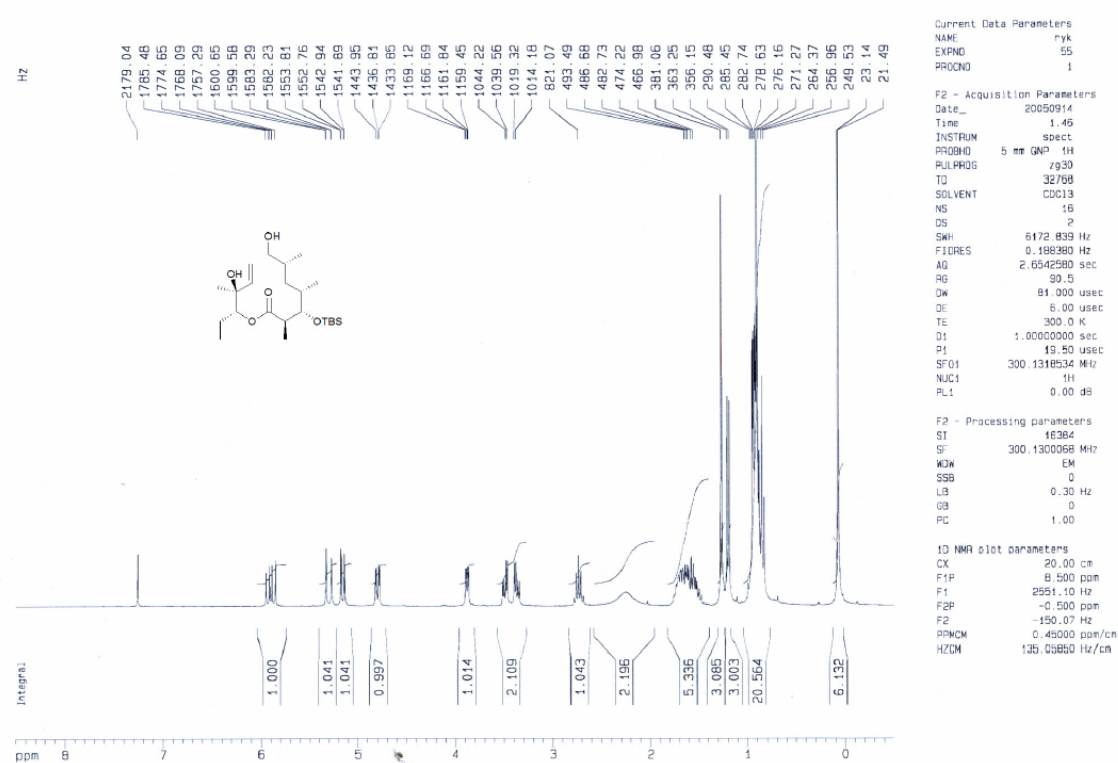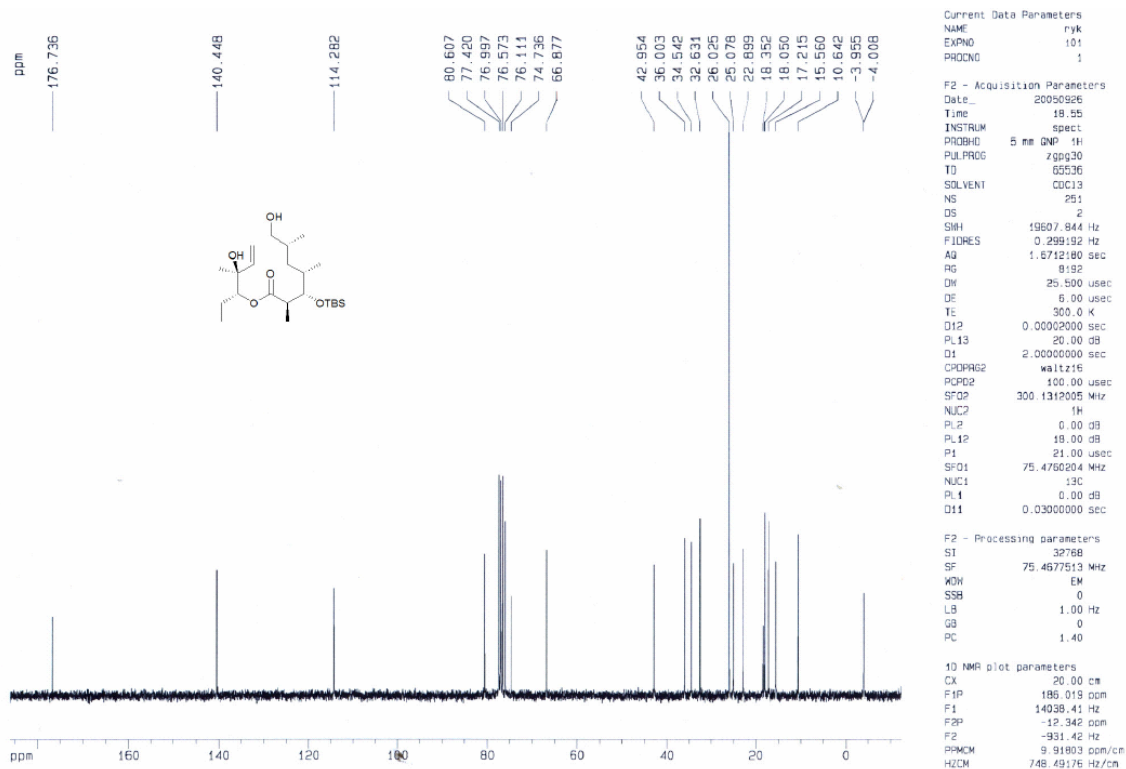

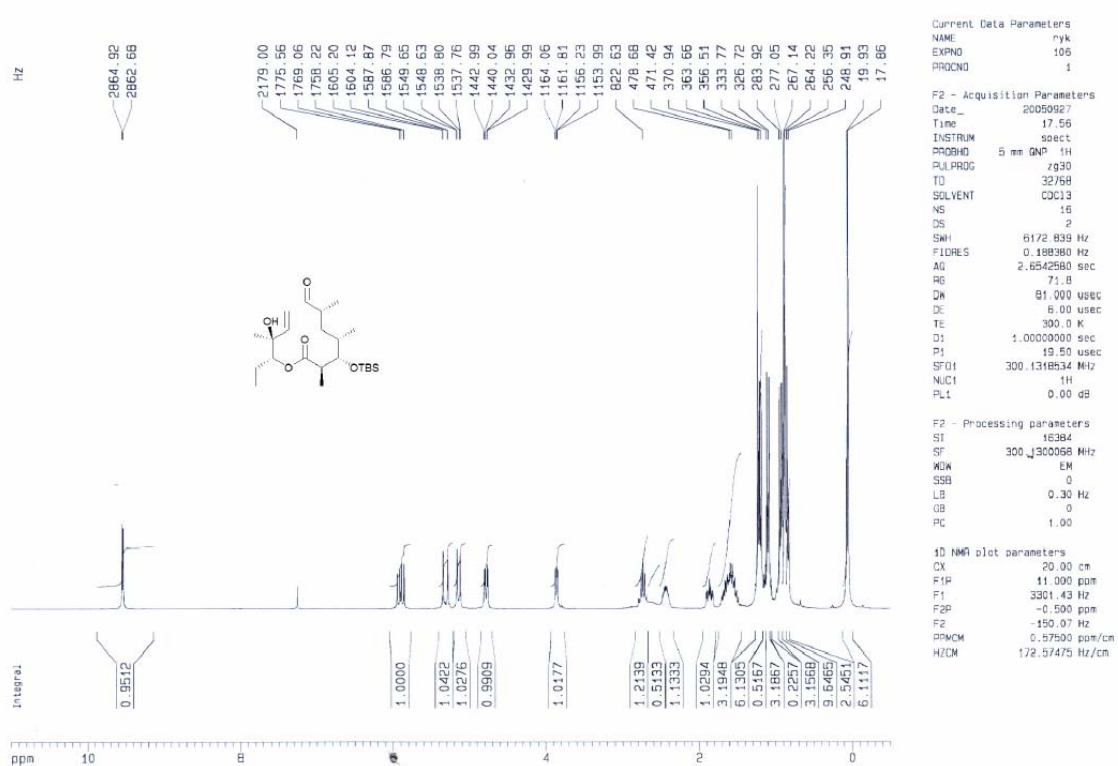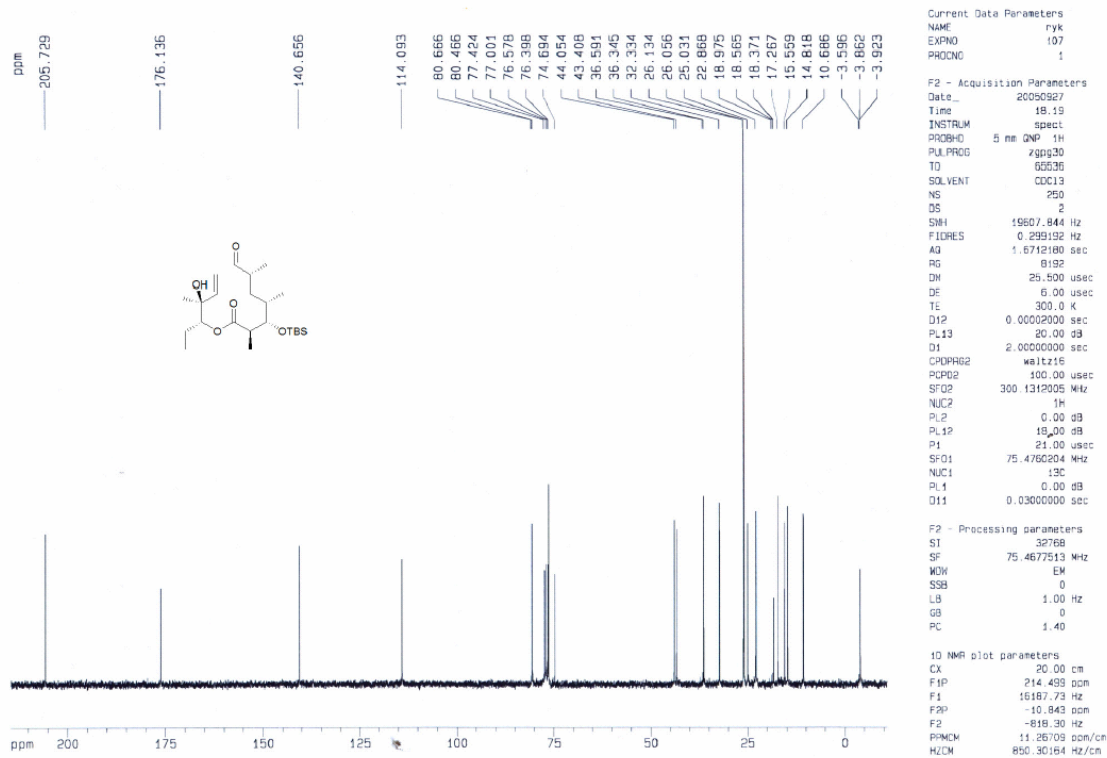

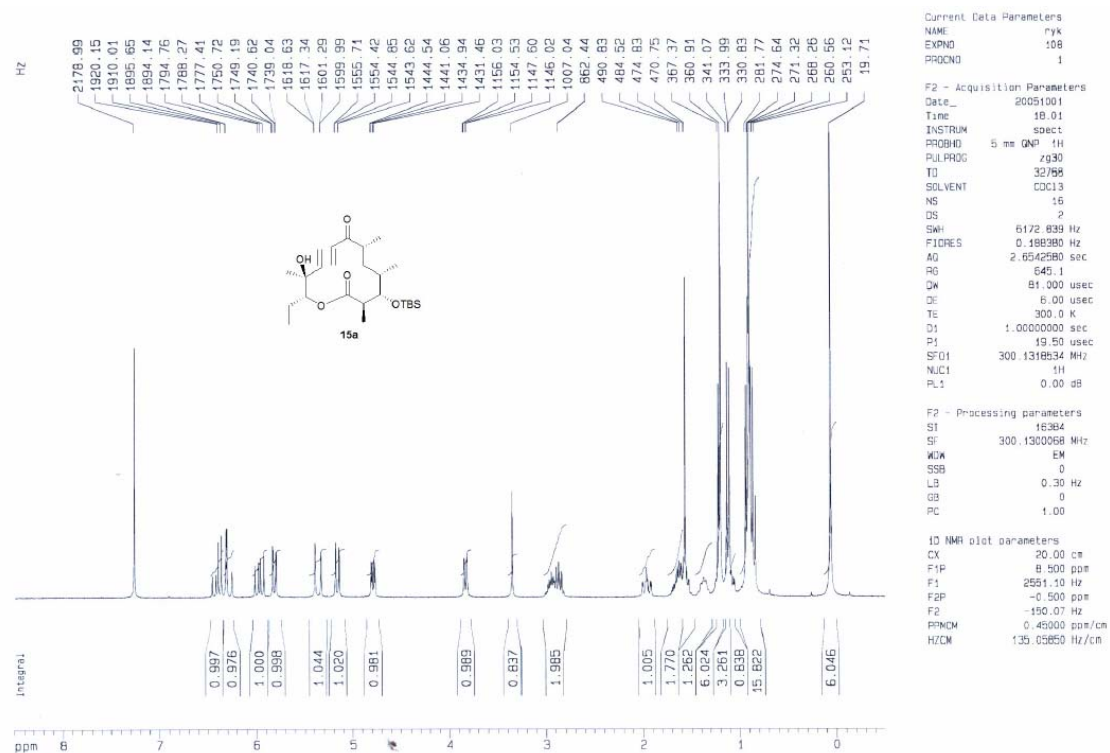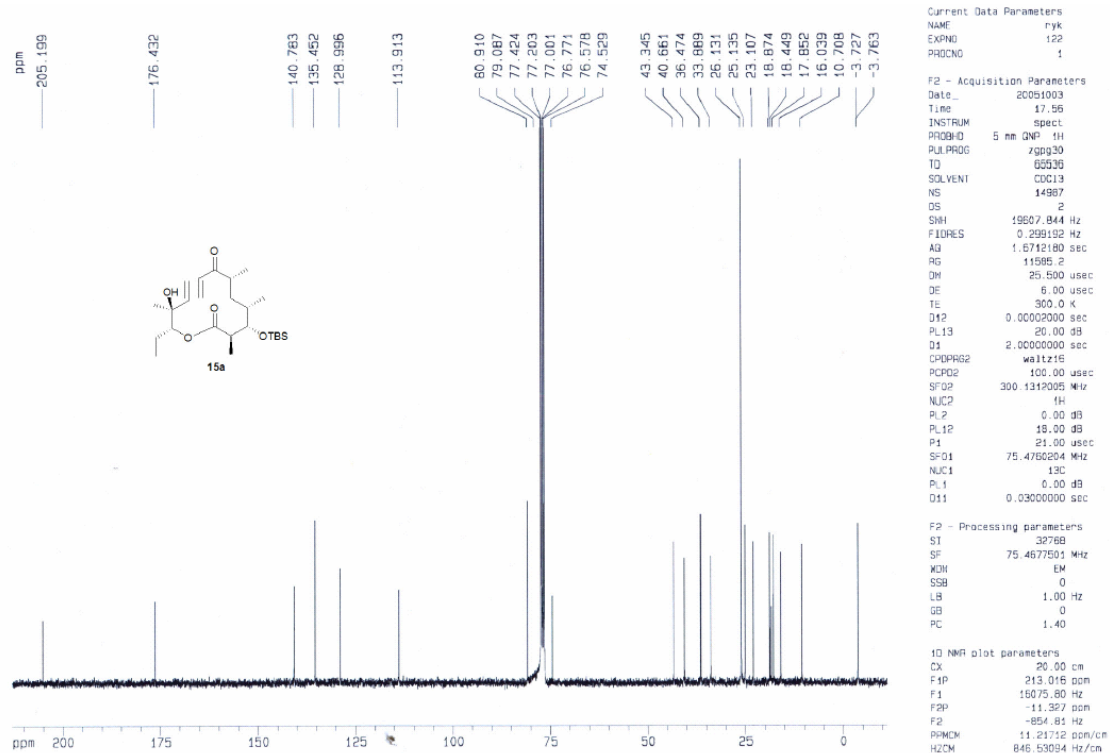

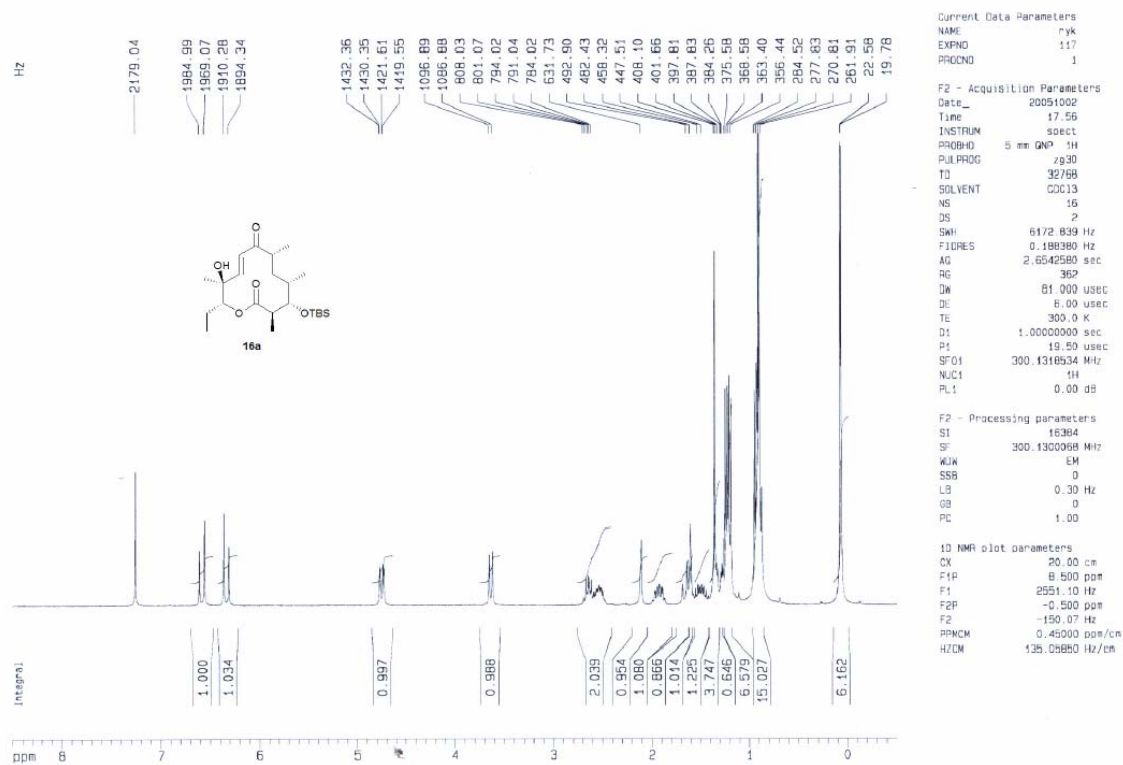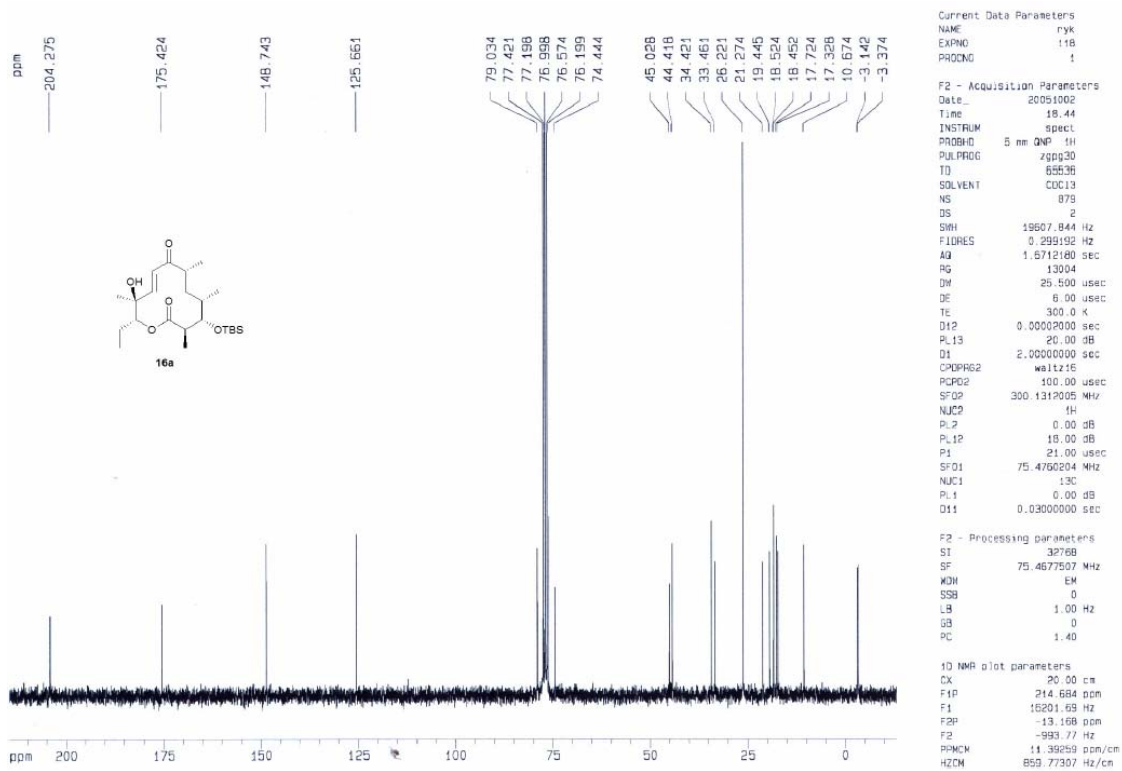

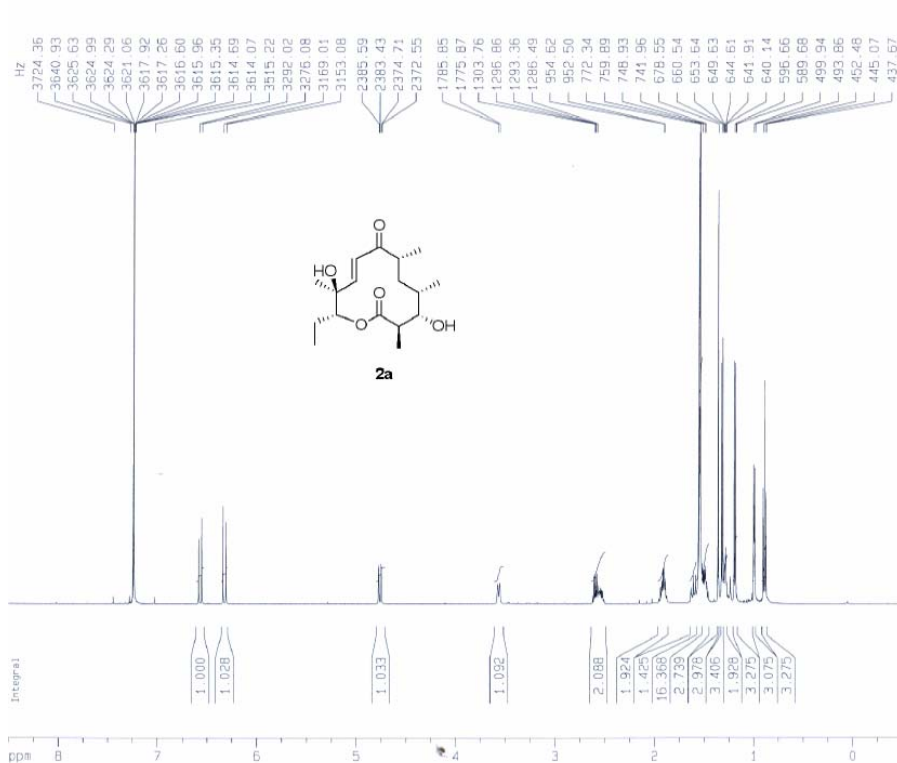

Current Data Parameters  
NAME 20050921  
EXPNO 4  
PROCNO 1

F2 - Acquisition Parameters  
Date\_ 20050922  
Time 18.21  
INSTRUM spect  
PROBHD 5 mm Dual 13C/  
PULPROG zg30  
TD 32768  
SOLVENT CDC13  
NS 256  
DS 2  
SWH 10330.578 Hz  
FIDRES 0.315264 Hz  
AQ 1.5860696 sec  
RG 912.7  
DW 48.400 usec  
DE 6.00 usec  
TE 298.0 K  
D1 1.00000000 sec  
MCREST 0.00000000 sec  
MCWRK 0.01500000 sec

----- CHANNEL f1 -----  
NUC1 1H  
P1 9.00 usec  
PL1 0.80 dB  
SFO1 500.1330865 MHz

F2 - Processing parameters  
SI 32768  
SF 500.1330231 MHz  
WDW EM  
SSB 0  
LB 0.30 Hz  
GB 0  
PC 1.00

ID NMR plot parameters  
CX 20.00 cm  
CY 30.00 cm  
FIP 8.500 ppm  
F1 4251.11 Hz  
F2 -0.500 ppm  
FZ -250.06 Hz  
PPMCM 0.45000 ppm/cm  
HZCM 225.05850 Hz/cm

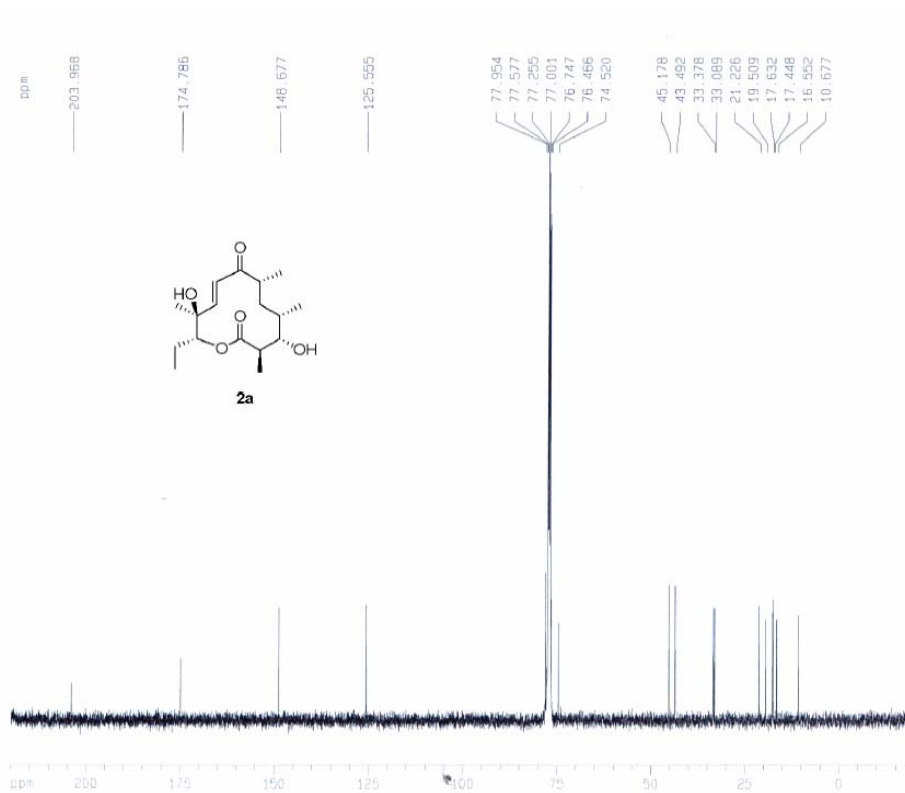

Current Data Parameters  
NAME 20050921  
EXPNO 5  
PROCNO 1

F2 - Acquisition Parameters  
Date\_ 20050923  
Time 8.46  
INSTRUM spect  
PROBHD 5 mm Dual 13C/  
PULPROG zgpg30  
TD 65536  
SOLVENT CDC13  
NS 19946  
DS 4  
SWH 31466.541 Hz  
FIDRES 0.479836 Hz  
AQ 1.0429883 sec  
RG 512  
DW 15.950 usec  
DE 6.00 usec  
TE 298.0 K  
D1 2.00000000 sec  
D11 0.03000000 sec  
DELTA 1.69999999 sec  
MCREST 0.00000000 sec  
MCWRK 0.01500000 sec

----- CHANNEL f1 -----  
NUC1 13C  
P1 10.00 usec  
PL1 2.60 dB  
SFO1 125.7703648 MHz

----- CHANNEL f2 -----  
DPPRG2 waltz16  
NUC2 1H  
PCPD2 100.00 usec  
PL2 0.80 dB  
PL12 21.72 dB  
PL13 23.00 dB  
SFO2 500.1325065 MHz

F2 - Processing parameters  
SI 32768  
SF 125.7577909 MHz  
WDW EM  
SSB 0  
LB 1.00 Hz  
GB 0  
PC 1.40

ID NMR plot parameters  
CX 20.00 cm  
CY 3.00 cm  
FIP 220.000 ppm  
F1 27666.71 Hz  
F2 -25.000 ppm  
FZ -2915.15 Hz  
PPMCM 12.90600 ppm/cm  
HZCM 1509.09338 Hz/cm

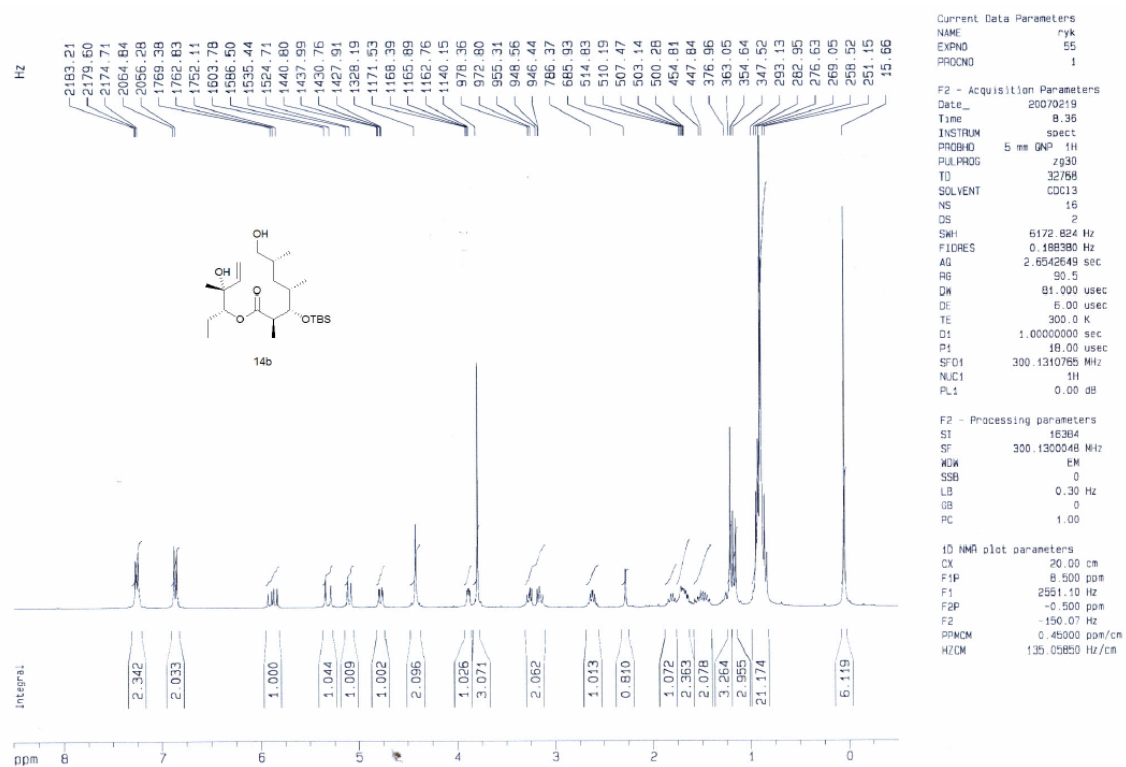

Current Data Parameters  
NAME ryk  
EXPNO 55  
PROCNO 1

F2 - Acquisition Parameters  
Date\_ 20070219  
Time 8.36  
INSTRUM spect  
PROBHD 5 mm QNP 1H  
PULPROG zg30  
TD 32768  
SOLVENT CDCl3  
NS 16  
DS 2  
SWH 6172.824 Hz  
FIDRES 0.188380 Hz  
AQ 2.6542649 sec  
RG 90.5  
DW 81.000 usec  
DE 6.00 usec  
TE 300.0 K  
D1 1.0000000 sec  
P1 18.00 usec  
SFO1 300.1310765 MHz  
NUC1 1H  
PL1 0.00 dB

F2 - Processing parameters  
SI 16384  
SF 300.1300048 MHz  
WDW EM  
SSB 0  
LB 0.30 Hz  
GB 0  
PC 1.00

1D NMR plot parameters  
CX 20.00 cm  
F1P 8.500 ppm  
F1 2551.10 Hz  
F2P -0.500 ppm  
F2 -150.07 Hz  
PRMCM 0.45000 ppm/cm  
HZCM 135.00850 Hz/cm

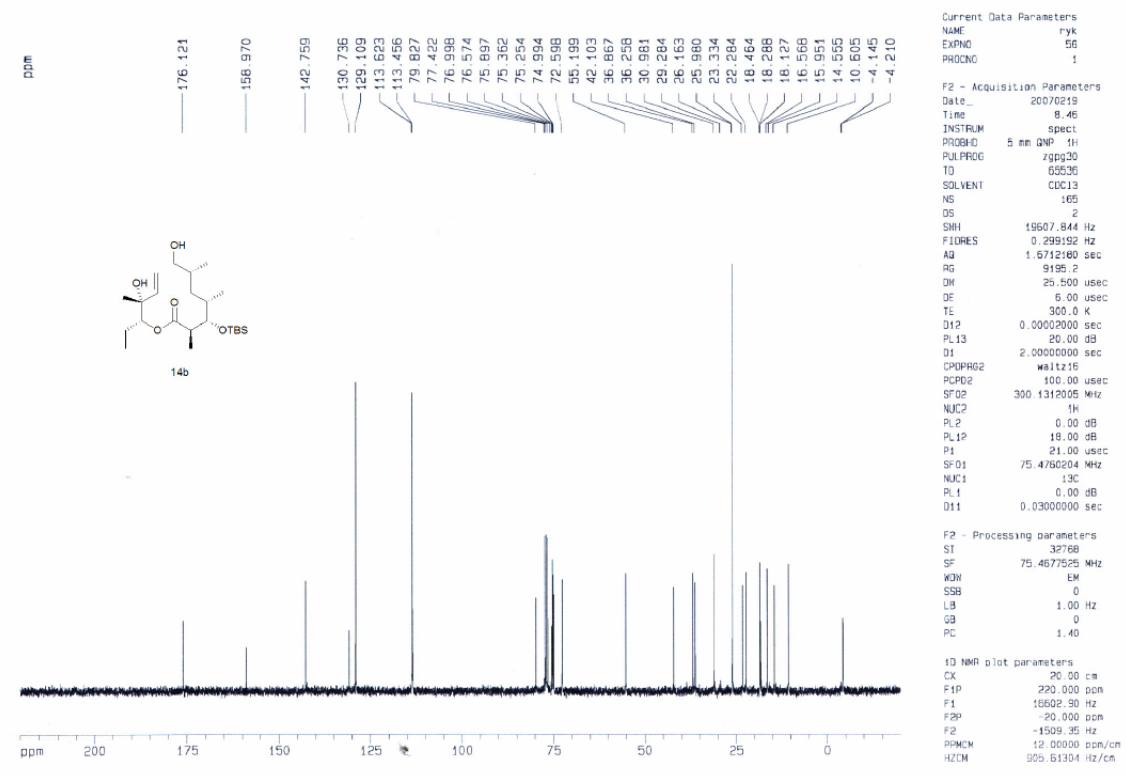

Current Data Parameters  
NAME ryk  
EXPNO 56  
PROCNO 1

F2 - Acquisition Parameters  
Date\_ 20070219  
Time 8.46  
INSTRUM spect  
PROBHD 5 mm QNP 1H  
PULPROG zgpg30  
TD 65536  
SOLVENT CDCl3  
NS 165  
DS 2  
SWH 19607.844 Hz  
FIDRES 0.299192 Hz  
AQ 1.6712160 sec  
RG 9195.2  
DW 25.500 usec  
DE 6.00 usec  
TE 300.0 K  
D12 0.0002000 sec  
PL13 20.00 dB  
D1 2.0000000 sec  
CPDPRG2 waltz16  
PCPD2 100.00 usec  
SFO2 300.1312005 MHz  
NUC2 13C  
PL2 0.00 dB  
PL12 18.00 dB  
P1 21.00 usec  
SFO1 75.4760204 MHz  
NUC1 13C  
PL1 0.00 dB  
D11 0.0300000 sec

F2 - Processing parameters  
SI 32768  
SF 75.4677525 MHz  
WDW EM  
SSB 0  
LB 1.00 Hz  
GB 0  
PC 1.40

1D NMR plot parameters  
CX 20.00 cm  
F1P 220.000 ppm  
F1 16602.50 Hz  
F2P -20.000 ppm  
F2 -1509.35 Hz  
PRMCM 12.00000 ppm/cm  
HZCM 906.61304 Hz/cm

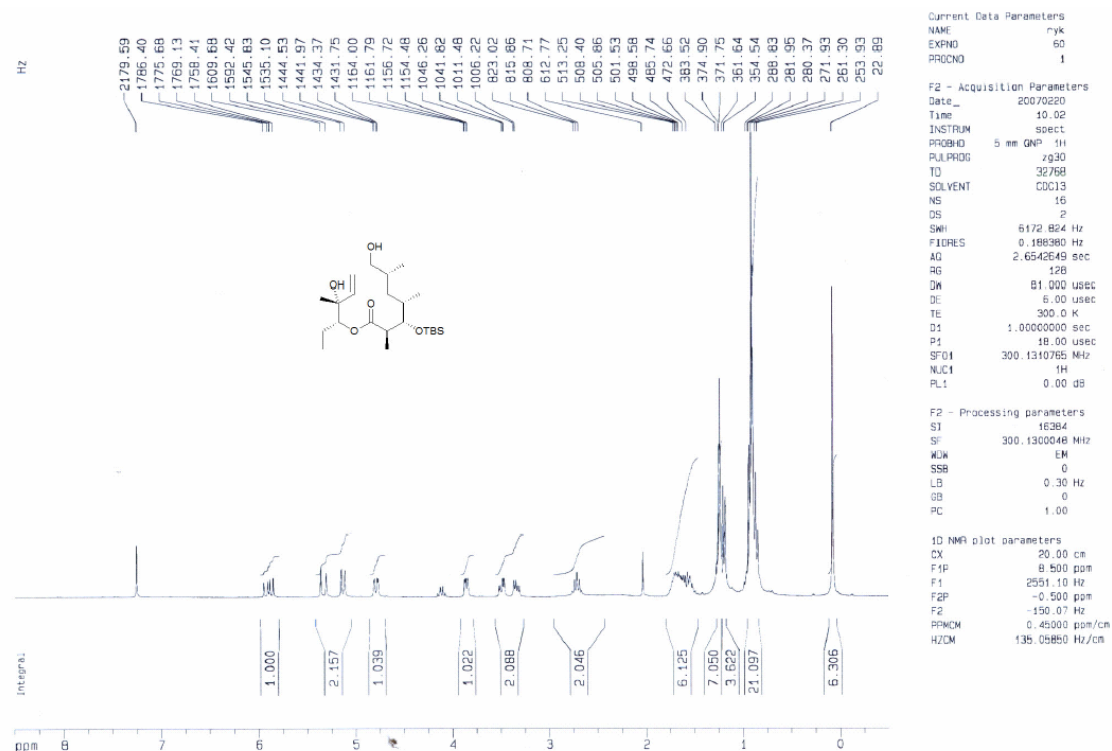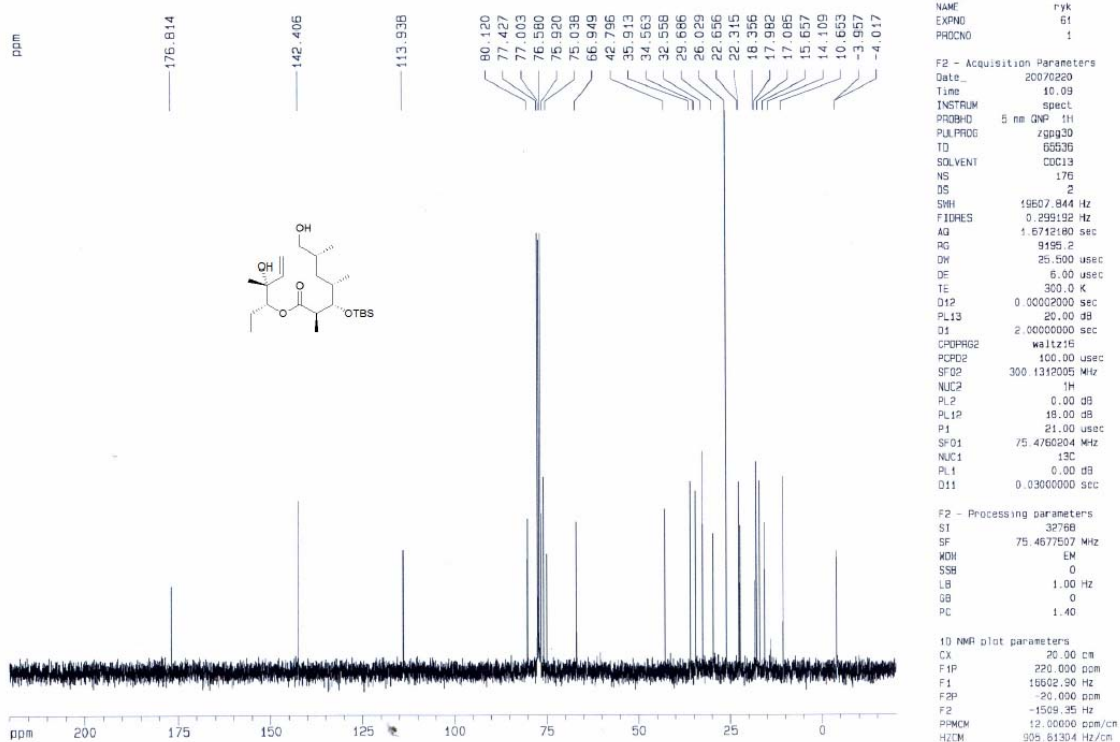



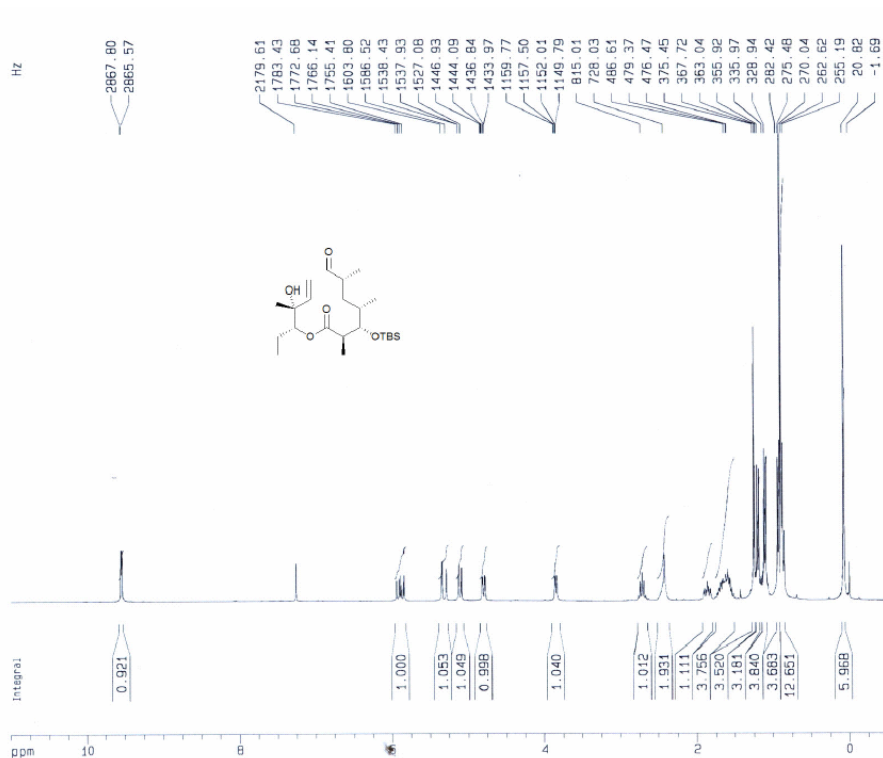

Current Data Parameters  
 NAME ryk  
 EXPNO 67  
 PROCNO 1

F2 - Acquisition Parameters  
 Date\_ 20070224  
 Time 5.29  
 INSTRUM spect  
 PROBRID 5 mm QNP 1H  
 PULPROG zg30  
 TD 32768  
 SOLVENT CDCl3  
 NS 32  
 DS 2  
 SWH 6172.824 Hz  
 FIDRES 0.188380 Hz  
 AQ 2.6542649 sec  
 RG 181  
 DW 81.000 usec  
 DE 6.000 usec  
 TE 300.0 K  
 D1 1.00000000 sec  
 P1 18.00 usec  
 SFO1 300.1310765 MHz  
 NUC1 1H  
 PL1 0.00 dB

F2 - Processing parameters  
 SI 16384  
 SF 300.1300048 MHz  
 MDW EM  
 SSB 0  
 LB 0.30 Hz  
 GB 0  
 PC 1.00

1D NMR plot parameters  
 CX 20.00 cm  
 F1P 11.000 ppm  
 F1 3301.43 Hz  
 F2P -0.500 ppm  
 F2 -150.07 Hz  
 PPMCM 0.57500 ppm/cm  
 HZCM 172.57475 Hz/cm

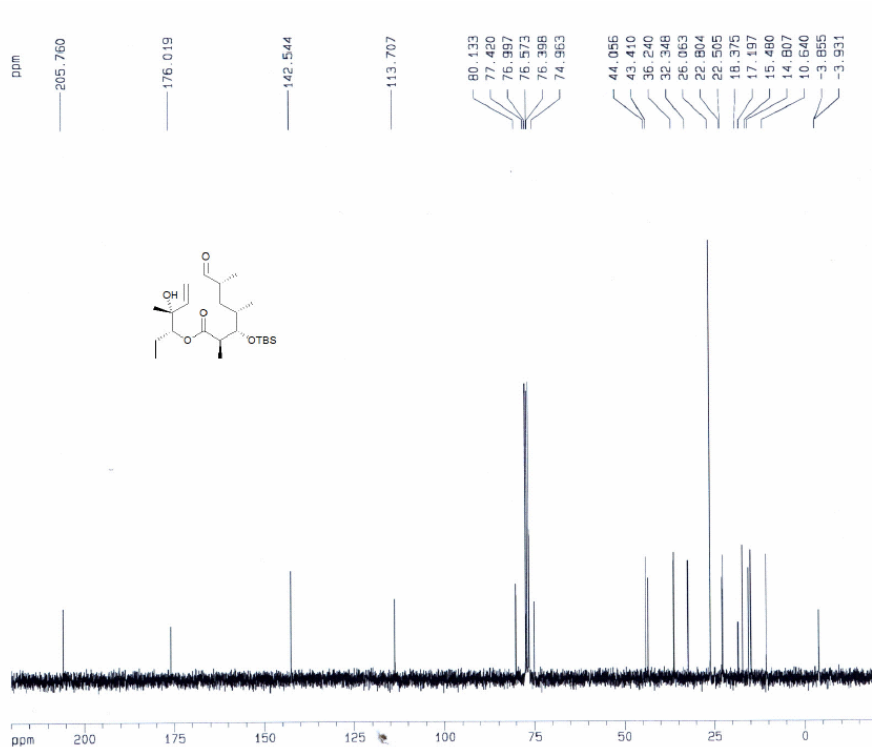

Current Data Parameters  
 NAME ryk  
 EXPNO 68  
 PROCNO 1

F2 - Acquisition Parameters  
 Date\_ 20070224  
 Time 5.39  
 INSTRUM spect  
 PROBRID 5 mm QNP 1H  
 PULPROG zgpg30  
 TD 65536  
 SOLVENT CDCl3  
 NS 128  
 DS 2  
 SWH 15607.844 Hz  
 FIDRES 0.299192 Hz  
 AQ 1.6721180 sec  
 RG 9195.2  
 DW 25.500 usec  
 DE 6.000 usec  
 TE 300.0 K  
 D12 0.00002000 sec  
 PL13 20.00 dB  
 D1 2.00000000 sec  
 CPMRG2 waltz16  
 PCPD2 100.00 usec  
 SFO2 300.1312005 MHz  
 NUC2 1H  
 PL2 0.00 dB  
 PL12 18.00 dB  
 P1 21.00 usec  
 SFO1 75.4762014 MHz  
 NUC1 13C  
 PL1 0.00 dB  
 D11 0.03000000 sec

F2 - Processing parameters  
 SI 32768  
 SF 75.4677513 MHz  
 MDW EM  
 SSB 0  
 LB 1.00 Hz  
 GB 0  
 PC 1.40

1D NMR plot parameters  
 CX 20.00 cm  
 F1P 220.000 ppm  
 F1 16602.90 Hz  
 F2P -20.000 ppm  
 F2 -1509.35 Hz  
 PPMCM 12.00000 ppm/cm  
 HZCM 908.61304 Hz/cm

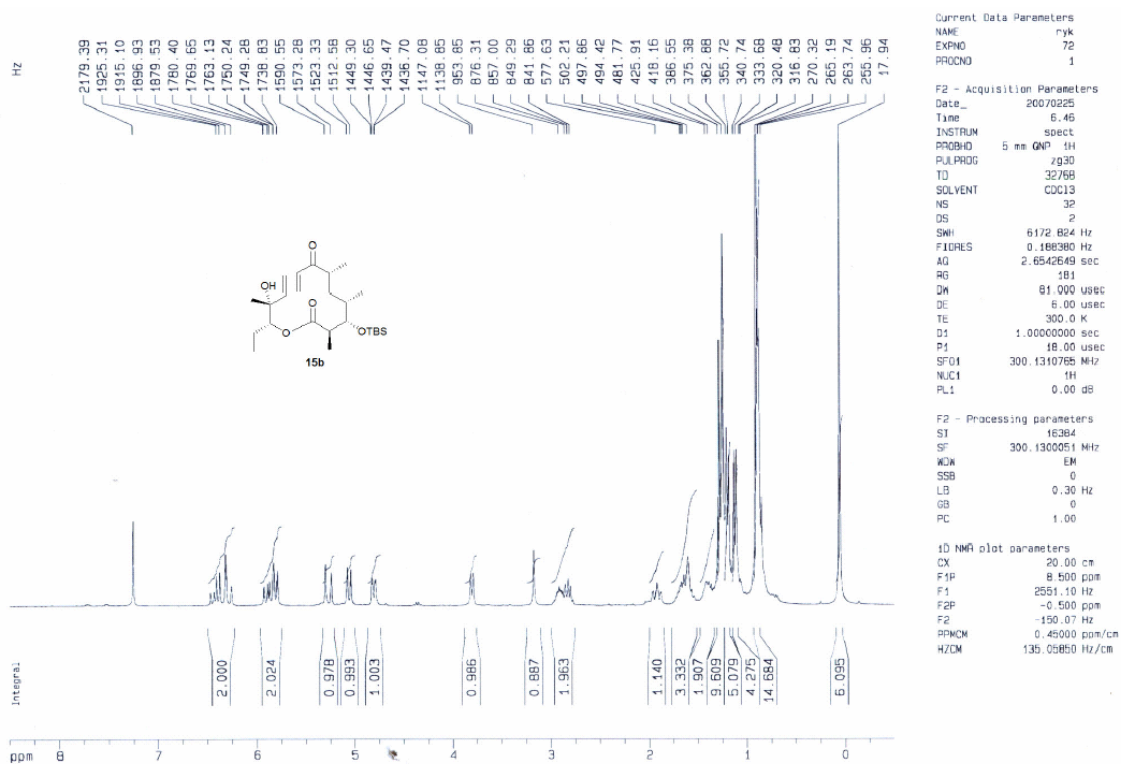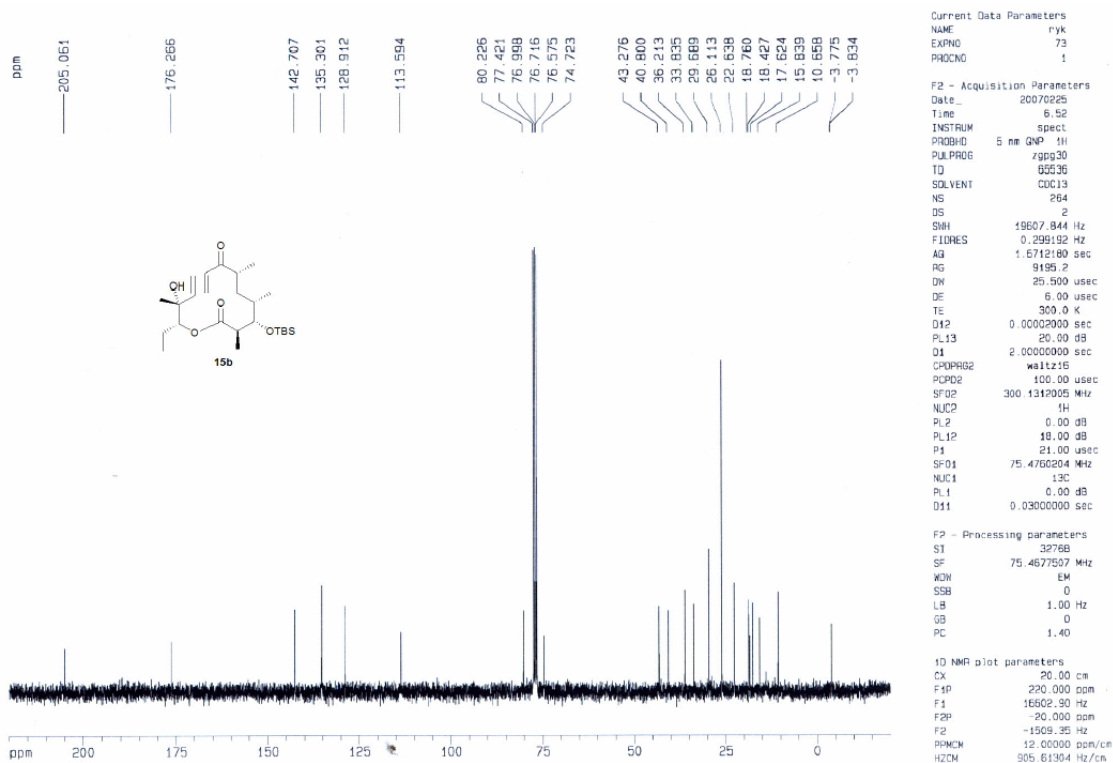

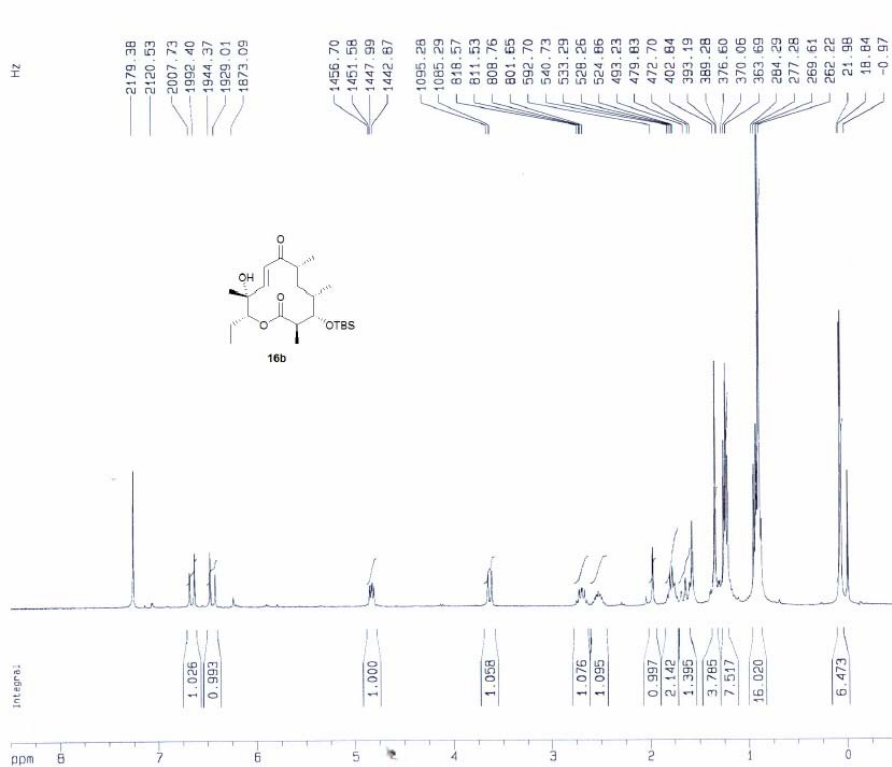

Current Data Parameters  
NAME ryk  
EXPNO 79  
PROCNO 1

F2 - Acquisition Parameters  
Date\_ 20070227  
Time 1.27  
INSTRUM spect  
PROBHD 5 mm QNP 1H  
PULPROG zg30  
TD 32768  
SOLVENT CDCl3  
NS 32  
DS 2  
SWH 6172.824 Hz  
FIDRES 0.188386 Hz  
AQ 2.6542649 sec  
RG 574.7  
DM 81.000 usec  
DE 6.00 usec  
TE 300.0 K  
D1 1.0000000 sec  
P1 18.00 usec  
SFO1 300.1310755 MHz  
NUC1 1H  
PL1 0.00 dB

F2 - Processing parameters  
SI 16384  
SF 300.1300051 MHz  
WDW EM  
SSB 0  
LB 0.35 Hz  
GB 0  
PC 1.00

1D NMR plot parameters  
CX 20.00 cm  
F1P 8.500 ppm  
F1 2551.10 Hz  
F2P -0.500 ppm  
F2 -150.07 Hz  
PRMCM 0.45000 ppm/cm  
HZCM 135.05850 Hz/cm

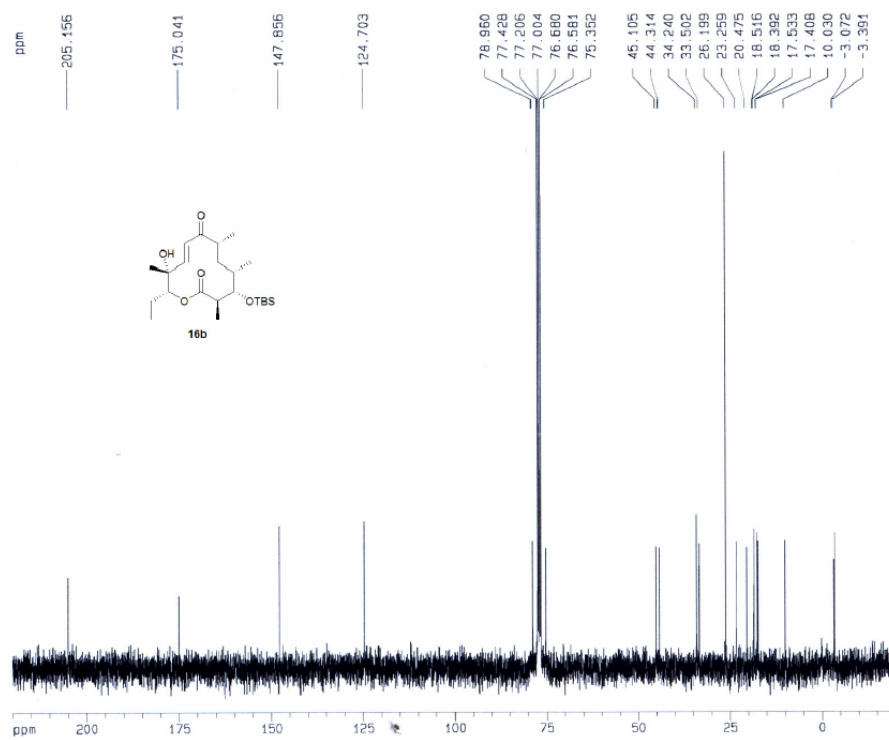

Current Data Parameters  
NAME ryk  
EXPNO 80  
PROCNO 1

F2 - Acquisition Parameters  
Date\_ 20070227  
Time 1.38  
INSTRUM spect  
PROBHD 5 mm QNP 1H  
PULPROG zgpg30  
TD 65536  
SOLVENT CDCl3  
NS 581  
DS 2  
SWH 19507.844 Hz  
FIDRES 0.259192 Hz  
AQ 1.6712180 sec  
RG 9195.2  
DM 25.500 usec  
DE 6.00 usec  
TE 300.0 K  
D1P 0.0000000 sec  
PL13 25.00 usec  
D1 2.0000000 sec  
CPDPRG2 waltz16  
PCPD2 100.00 usec  
SFO2 300.1312005 MHz  
NUC2 13C  
PL2 0.00 dB  
PLP2 18.00 dB  
F1 21.00 usec  
SFO1 75.4760204 MHz  
NUC1 13C  
PL1 0.00 dB  
D11 0.0300000 sec

F2 - Processing parameters  
SI 32768  
SF 75.4677507 MHz  
WDW EM  
SSB 0  
LB 1.00 Hz  
GB 0  
PC 1.40

1D NMR plot parameters  
CX 20.00 cm  
F1P 220.000 ppm  
F1 16662.50 Hz  
F2P -20.000 ppm  
F2 -1509.35 Hz  
PRMCM 12.00000 ppm/cm  
HZCM 905.61304 Hz/cm

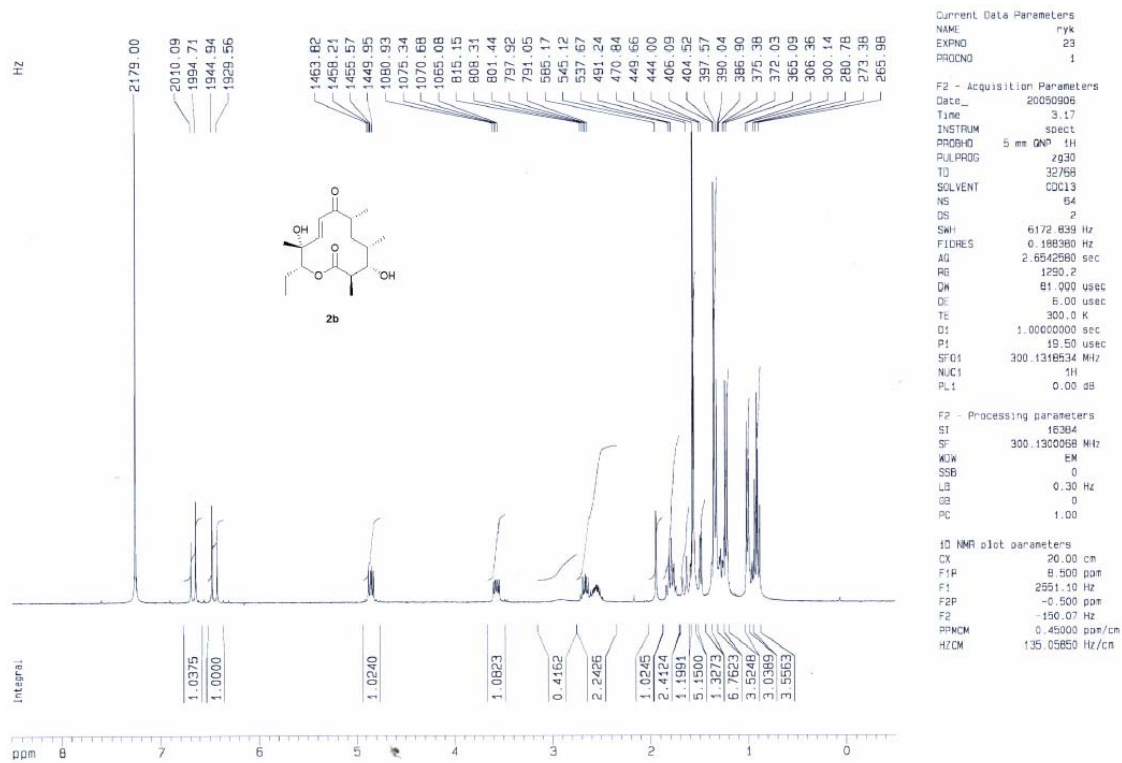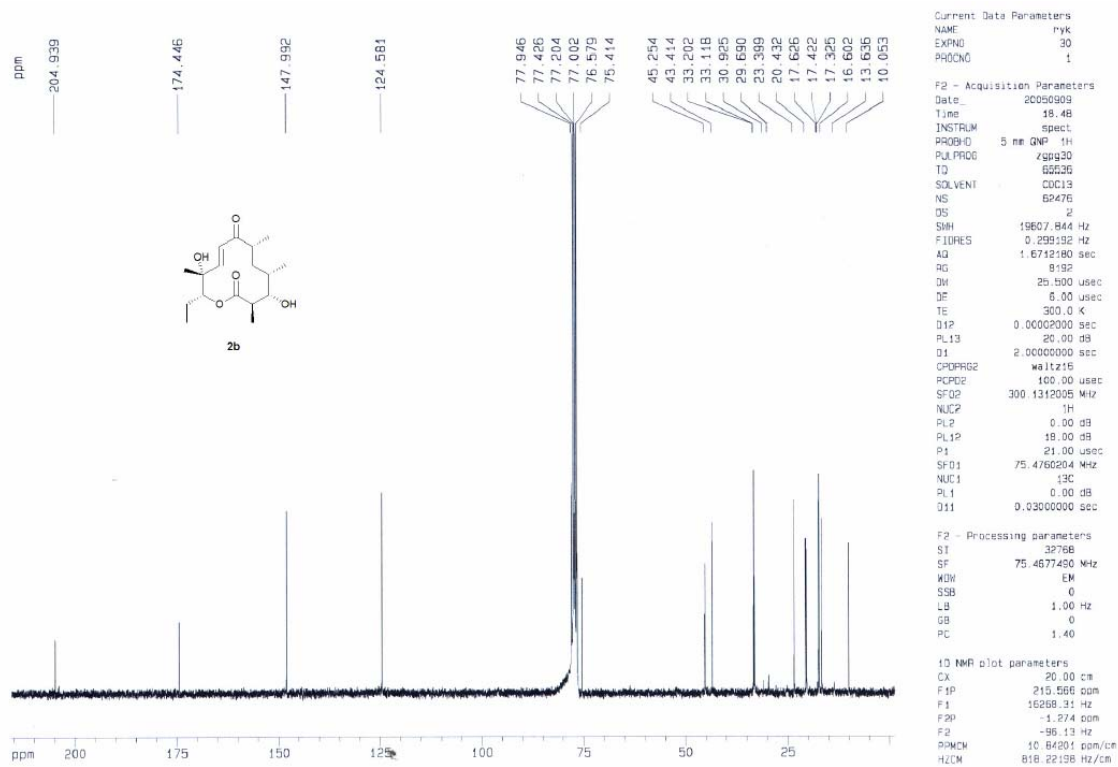

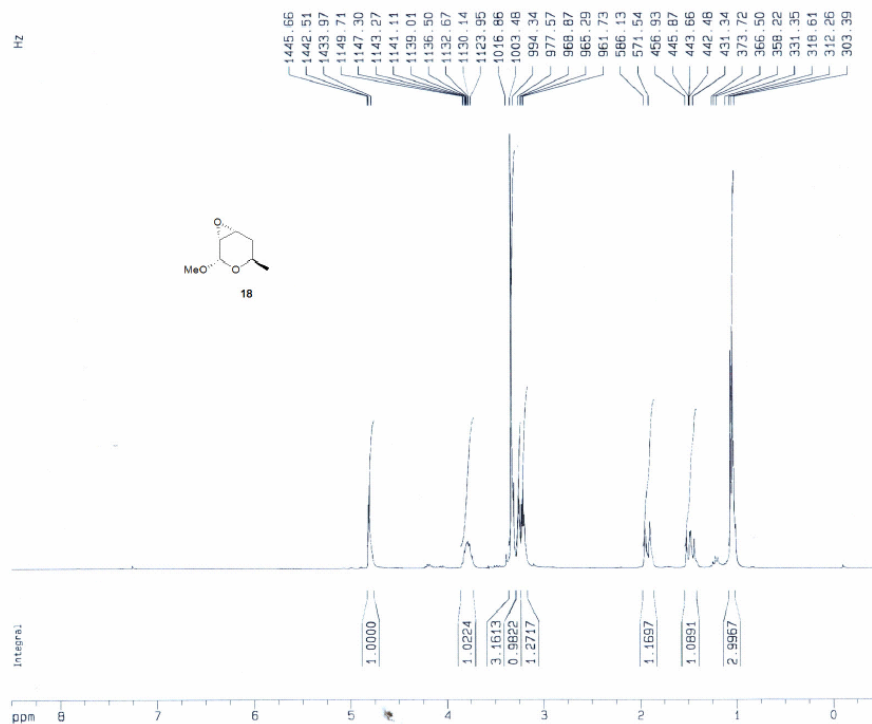

Current Data Parameters  
NAME xuan  
EXPNO 104  
PROCNO 1

F2 - Acquisition Parameters  
Date\_ 20070423  
Time 7.51  
INSTRUM spect  
PROBHD 5 mm QNP 1H  
PULPROG zg30  
TD 32768  
SOLVENT Aceton  
NS 16  
DS 2  
SWH 6172.824 Hz  
FIDRES 0.188380 Hz  
AQ 2.6542649 sec  
RG 40.3  
DN 81.000 usec  
DE 6.00 usec  
TE 300.0 K  
D1 1.0000000 sec  
P1 18.00 usec  
SFO1 300.1310765 MHz  
NUC1 1H  
PL1 0.00 dB

F2 - Processing parameters  
SI 16384  
SF 300.1300051 MHz  
WDW EM  
SSB 0  
LB 0.30 Hz  
GB 0  
PC 1.00

1D NMR plot parameters  
CX 20.00 cm  
F1P 8.500 ppm  
F1 2551.10 Hz  
F2P -0.500 ppm  
F2 -150.07 Hz  
PPMCM 0.45000 ppm/cm  
HZCM 135.05850 Hz/cm

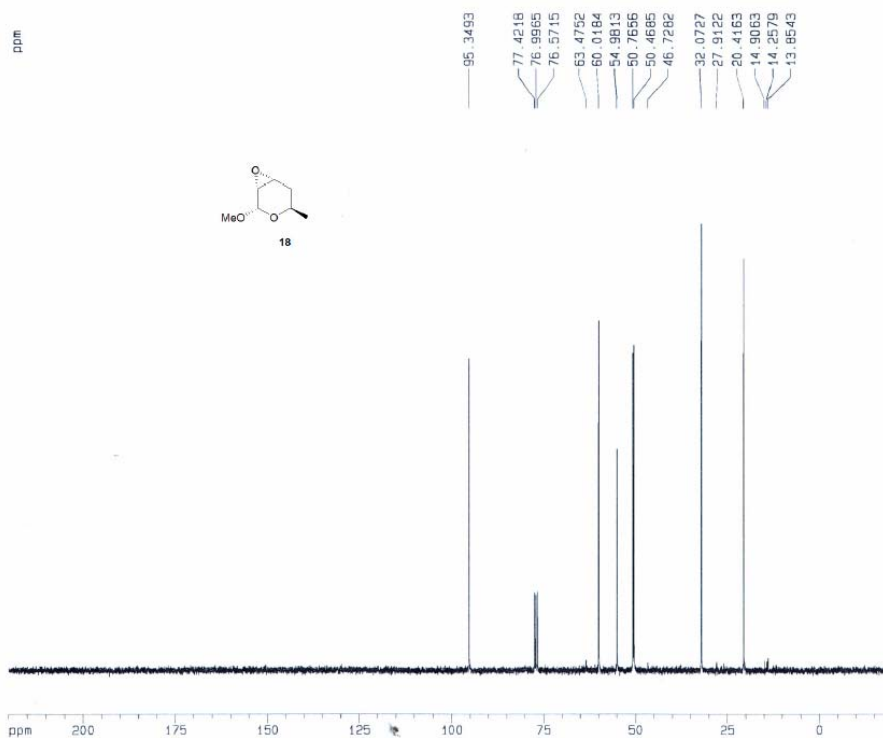

Current Data Parameters  
NAME xuan  
EXPNO 103  
PROCNO 1

F2 - Acquisition Parameters  
Date\_ 20070423  
Time 7.46  
INSTRUM spect  
PROBHD 5 mm QNP 1H  
PULPROG zgpg30  
TD 65536  
SOLVENT CDCl3  
NS 88  
DS 2  
SWH 19607.844 Hz  
FIDRES 0.239192 Hz  
AQ 1.5712180 sec  
RG 9195.2  
DN 26.500 usec  
DE 6.00 usec  
TE 300.0 K  
D12 0.00002000 sec  
PL13 20.00 dB  
D1 2.0000000 sec  
GRDPRG2 waltz16  
PCPD2 100.00 usec  
SFO2 300.1312005 MHz  
NUC2 13C  
PL2 0.00 dB  
PL12 18.00 dB  
P1 21.00 usec  
SFO1 75.4760204 MHz  
NUC1 13C  
PL1 0.00 dB  
D11 0.0300000 sec

F2 - Processing parameters  
SI 32768  
SF 75.4677620 MHz  
WDW EM  
SSB 0  
LB 1.00 Hz  
GB 0  
PC 1.40

1D NMR plot parameters  
CX 20.00 cm  
F1P 220.000 ppm  
F1 16602.31 Hz  
F2P -20.000 ppm  
F2 -1509.36 Hz  
PPMCM 12.00000 ppm/cm  
HZCM 905.61316 Hz/cm

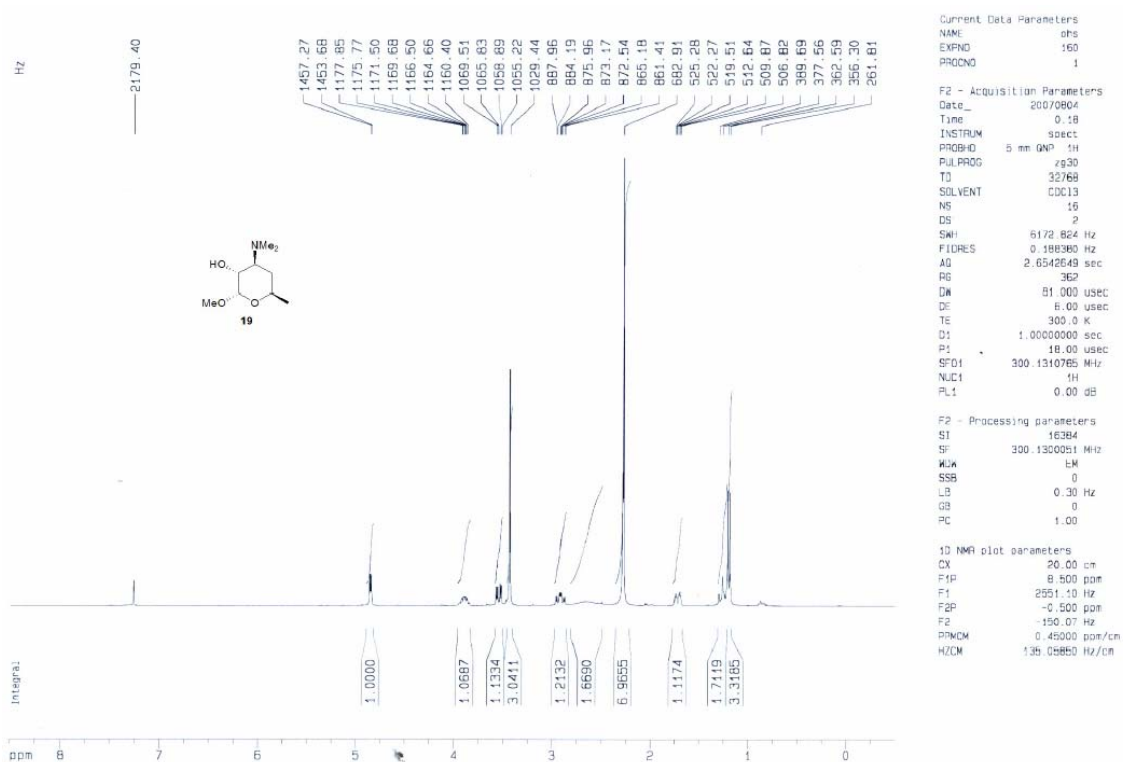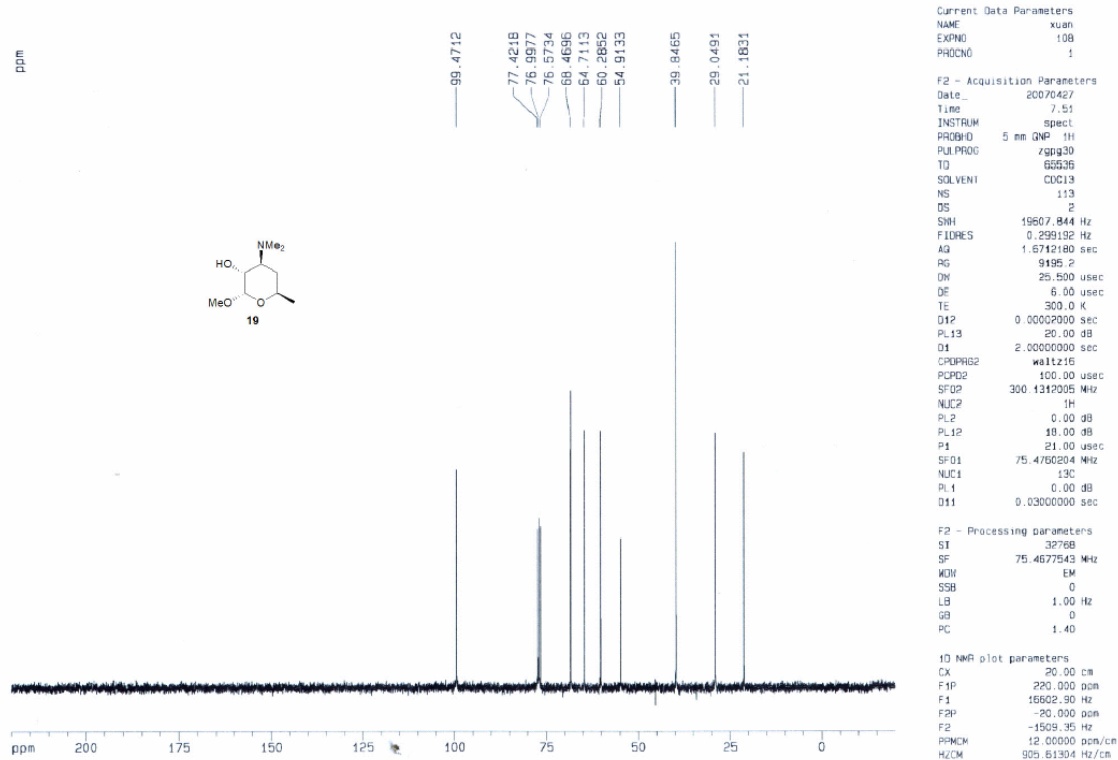

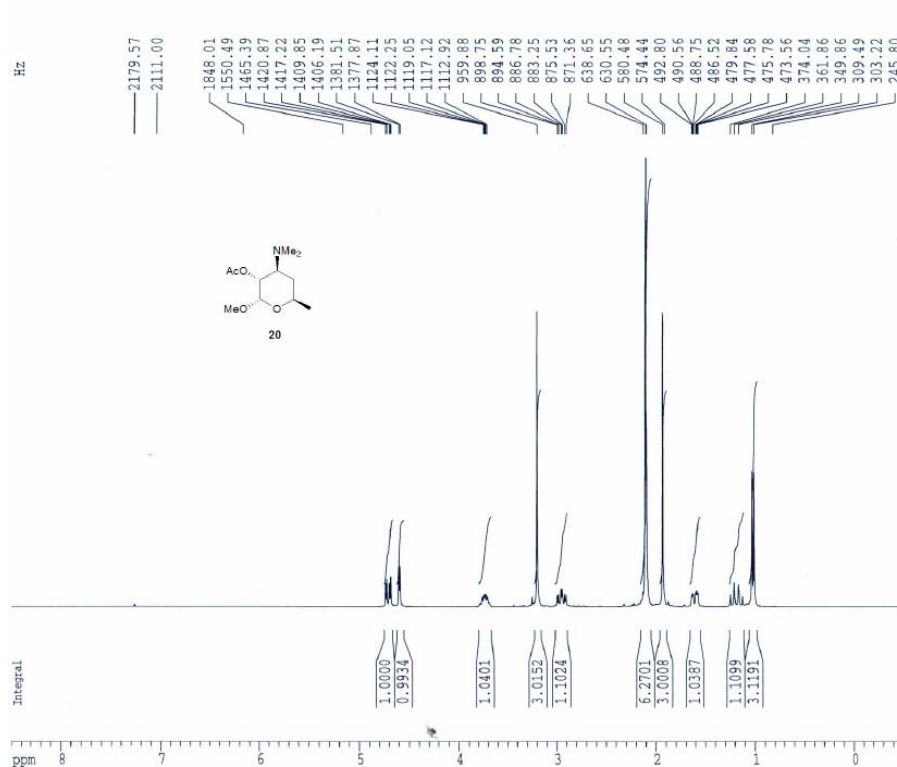

Current Data Parameters  
NAME 40-249  
EXPNO 462  
PROCNO 1

F2 - Acquisition Parameters  
Date\_ 20080826  
Time 4.11  
INSTRUM spect  
PROBHD 5 mm QNP 1H  
PULPROG zg30  
TD 32768  
SOLVENT CDCl3  
NS 16  
DS 2  
SWH 6172.839 Hz  
FIDRES 0.188380 Hz  
AQ 2.6542580 sec  
RG 20.2  
DW 81.000 usec  
DE 6.00 usec  
TE 300.0 K  
D1 2.00000000 sec

===== CHANNEL f1 =====  
NUC1 1H  
P1 11.80 usec  
PL1 -4.00 dB  
SFO1 300.1318534 MHz

F2 - Processing parameters  
SI 32768  
SF 300.1300053 MHz  
WDW EM  
SSB 0  
LB 0.10 Hz  
GB 0  
PC 1.00

1D NMR plot parameters  
CX 20.00 cm  
F1P 8.500 ppm  
F1 2551.10 Hz  
F2P -0.500 ppm  
F2 -150.07 Hz  
PPMCM 0.45000 ppm/cm  
HZCM 135.05850 Hz/cm

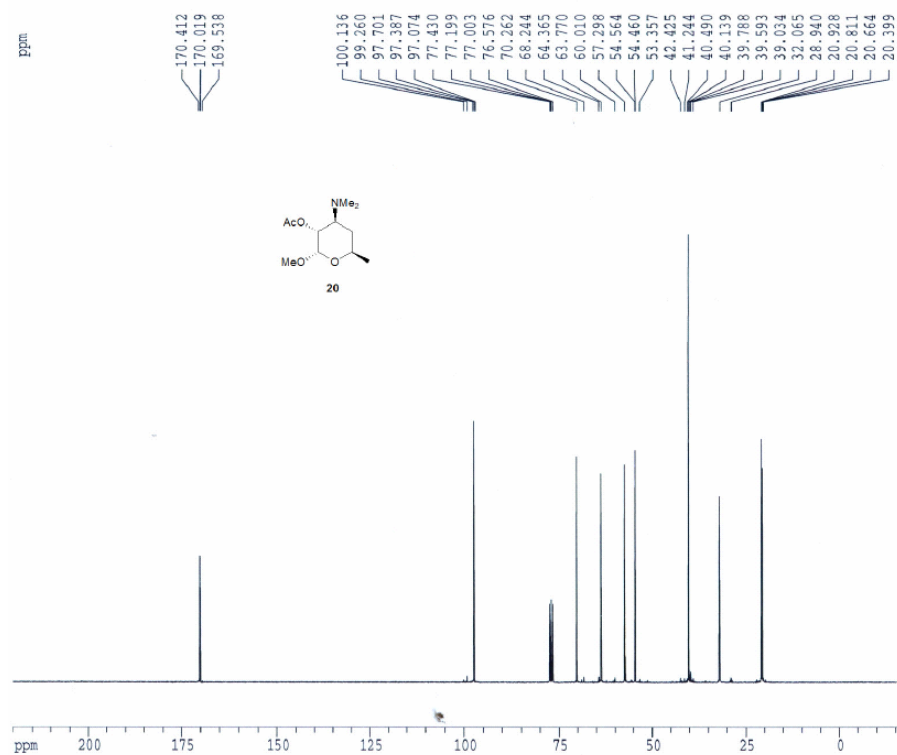

Current Data Parameters  
NAME 40-249  
EXPNO 463  
PROCNO 1

F2 - Acquisition Parameters  
Date\_ 20080826  
Time 4.18  
INSTRUM spect  
PROBHD 5 mm QNP 1H  
PULPROG zgpg30  
TD 65536  
SOLVENT CDCl3  
NS 997  
DS 4  
SWH 18832.393 Hz  
FIDRES 0.287360 Hz  
AQ 1.7400308 sec  
RG 812  
DW 26.550 usec  
DE 6.00 usec  
TE 300.0 K  
D1 2.00000000 sec  
D11 0.03000000 sec  
D12 0.00002000 sec

===== CHANNEL f1 =====  
NUC1 13C  
P1 8.00 usec  
PL1 -1.00 dB  
SFO1 75.4760200 MHz

===== CHANNEL f2 =====  
CPDPRG2 waltz16  
NUC2 1H  
PCPD2 100.00 usec  
PL2 -4.00 dB  
PL12 18.00 dB  
PL13 21.00 dB  
SFO2 300.1312005 MHz

F2 - Processing parameters  
SI 32768  
SF 75.4677635 MHz  
WDW EM  
SSB 0  
LB 1.00 Hz  
GB 0  
PC 1.40

1D NMR plot parameters  
CX 20.00 cm  
F1P 220.000 ppm  
F1 16602.91 Hz  
F2P -20.000 ppm  
F2 -1509.36 Hz  
PPMCM 12.00000 ppm/cm  
HZCM 905.61316 Hz/cm

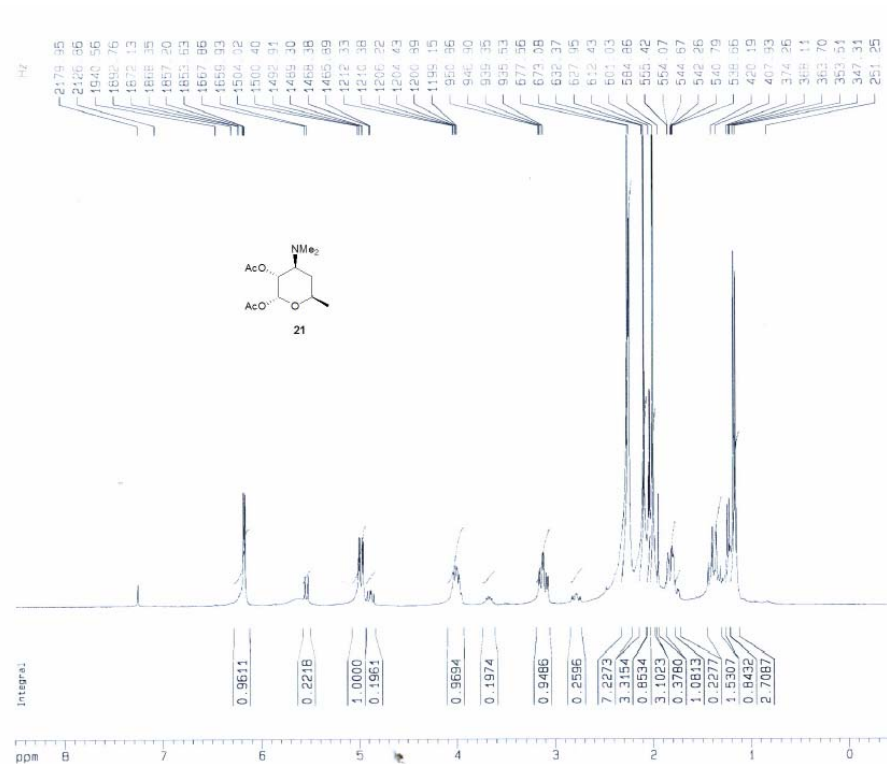

Current Data Parameters  
 NAME 40-249  
 EXPNO 330  
 PROCNO 1

F2 - Acquisition Parameters  
 Date\_ 2008/15  
 Time 8.38  
 INSTRUM spect  
 PROBHD 5 mm QNP 1H  
 PULPROG zg30  
 TD 32768  
 SOLVENT CDCl3  
 NS 16  
 DS 2  
 SWH 6172.839 Hz  
 FIDRES 0.188380 Hz  
 AQ 2.6542580 sec  
 RG 71.8  
 DW 81.000 usec  
 DE 6.00 usec  
 TE 300.0 K  
 D1 2.00000000 sec

----- CHANNEL f1 -----  
 NUC1 1H  
 P1 11.80 usec  
 PL1 -4.00 dB  
 SFO1 300.1318534 MHz

F2 - Processing parameters  
 SI 32768  
 SF 300.130051 MHz  
 WDW EM  
 SSB 0  
 LB 0.30 Hz  
 GB 0  
 PC 1.00

1D NMR plot parameters  
 CX 20.00 cm  
 F1 8.500 ppm  
 F2 2591.10 Hz  
 F3 -0.500 ppm  
 F4 -150.07 Hz  
 FWHM 0.45000 ppm/cm  
 HZCM 135.05850 Hz/cm

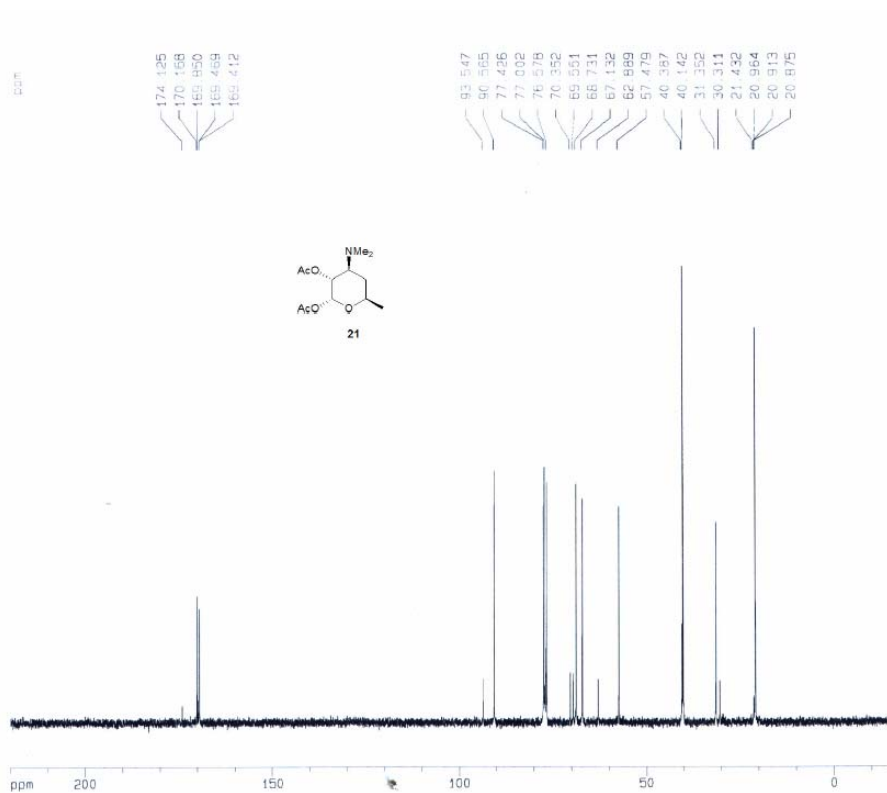

Current Data Parameters  
 NAME 40-249  
 EXPNO 330  
 PROCNO 1

F2 - Acquisition Parameters  
 Date\_ 2008/15  
 Time 8.47  
 INSTRUM spect  
 PROBHD 5 mm QNP 1H  
 PULPROG zgpg30  
 TD 65536  
 SOLVENT CDCl3  
 NS 412  
 DS 4  
 SWH 18832.393 Hz  
 FIDRES 0.287360 Hz  
 AQ 1.7402938 sec  
 RG 16384  
 DW 26.550 usec  
 DE 6.00 usec  
 TE 300.0 K  
 D1 2.00000000 sec  
 D11 0.03000000 sec  
 D12 0.00002000 sec

----- CHANNEL f1 -----  
 NUC1 13C  
 P1 8.00 usec  
 PL1 -3.00 dB  
 SFO1 76.4762000 MHz

----- CHANNEL f2 -----  
 CPOPRG2 waltz16  
 NUC2 1H  
 P2 100.00 usec  
 PL2 -4.00 dB  
 PL12 18.00 dB  
 PL13 21.00 dB  
 SFO2 300.1312005 MHz

F2 - Processing parameters  
 SI 32768  
 SF 76.4677505 MHz  
 WDW EM  
 SSB 0  
 LB 1.00 Hz  
 GB 0  
 PC 1.40

1D NMR plot parameters  
 CX 20.00 cm  
 F1 200.000 ppm  
 F2 16682.81 Hz  
 F3 -20.000 ppm  
 F4 -1589.36 Hz  
 FWHM 12.00000 ppm/cm  
 HZCM 905.61310 Hz/cm



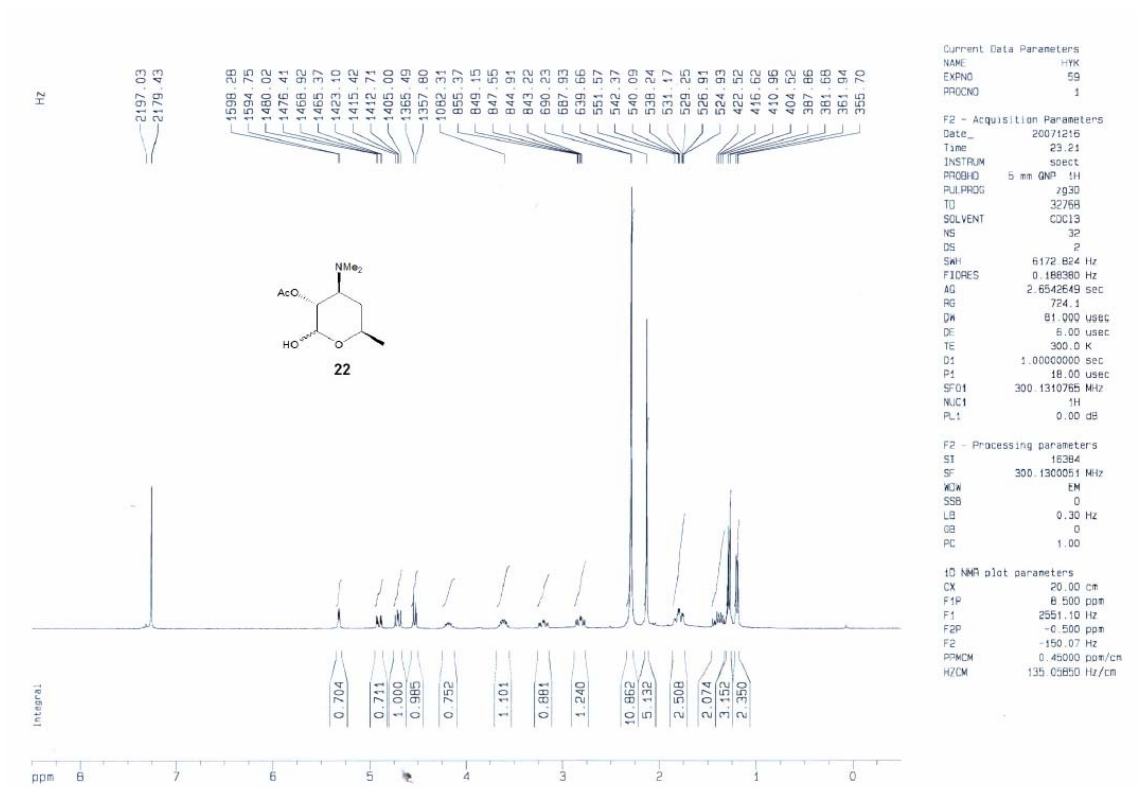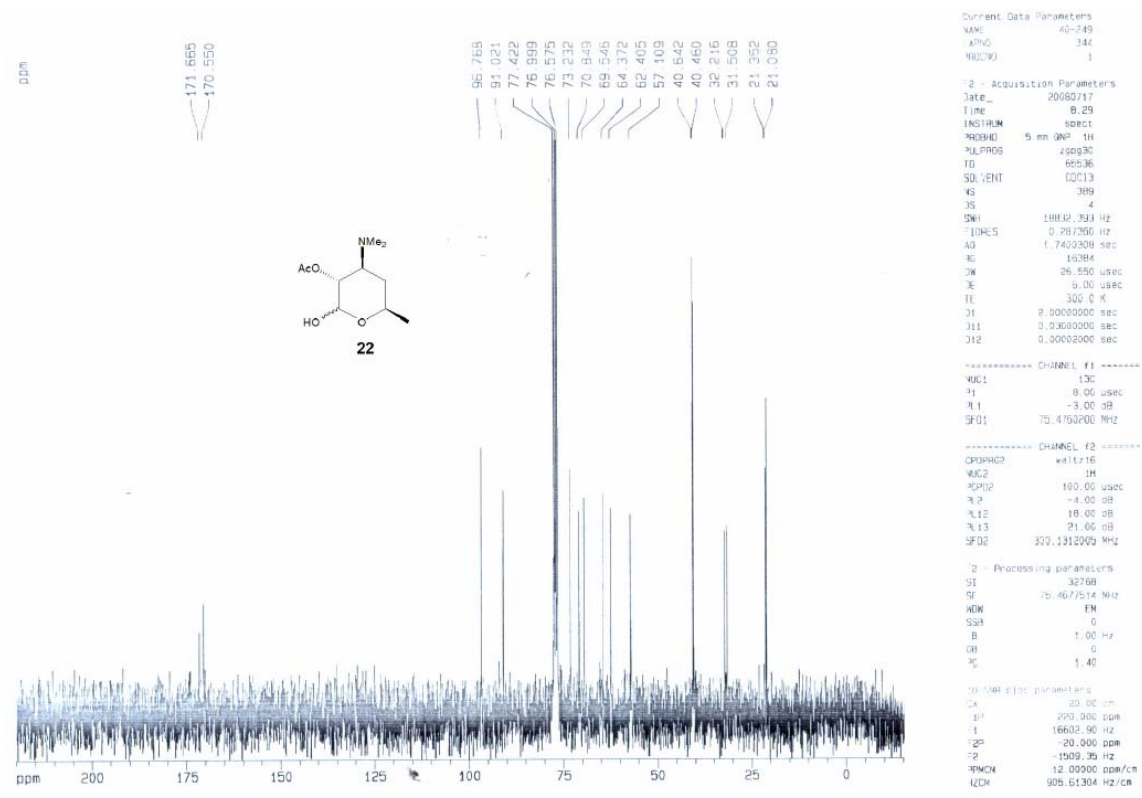

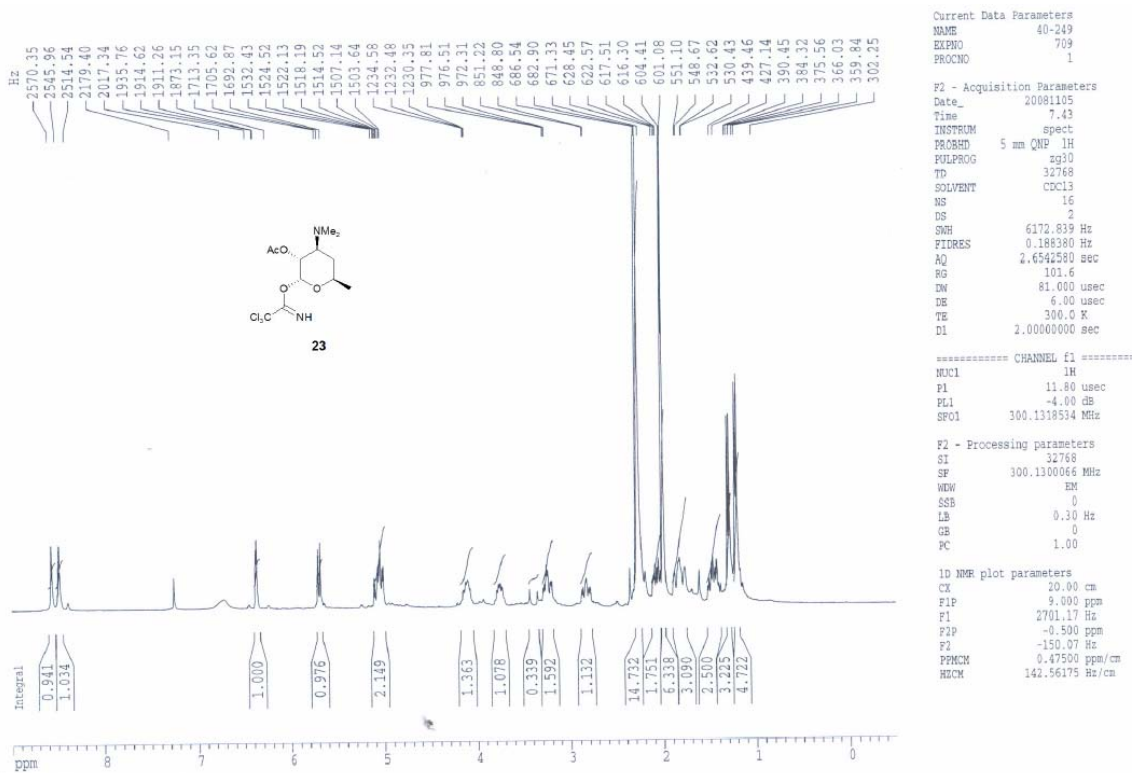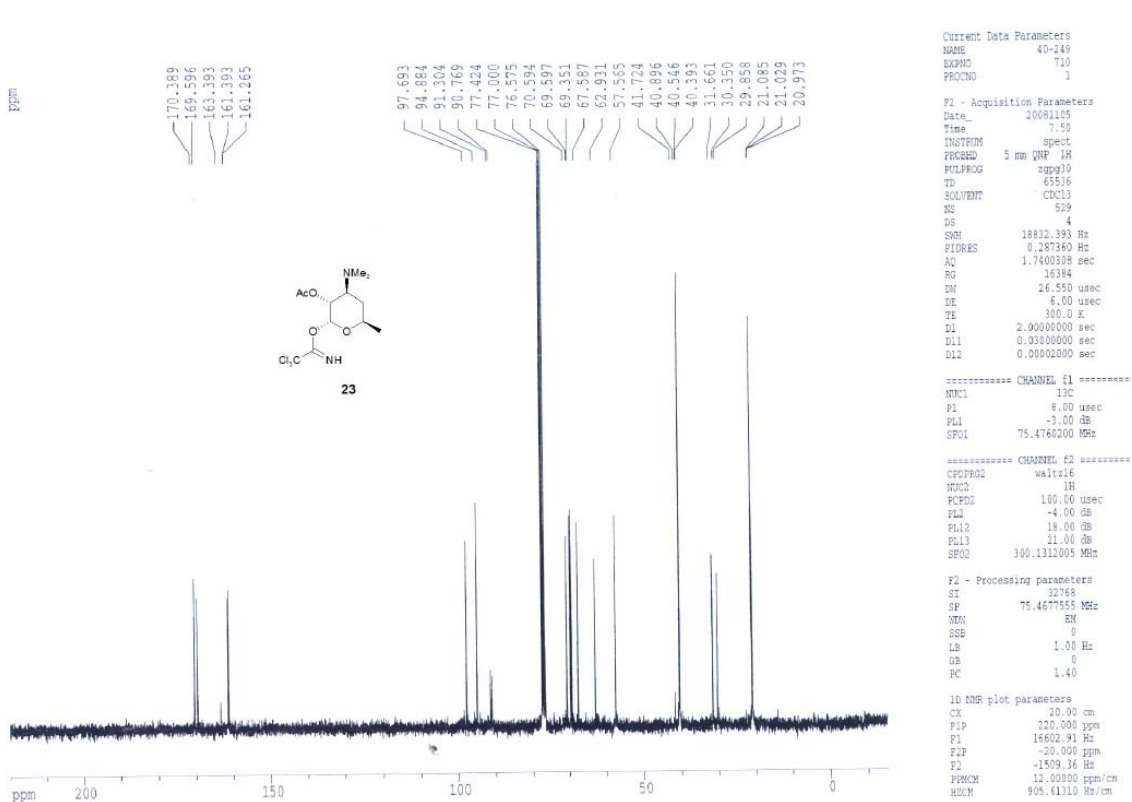

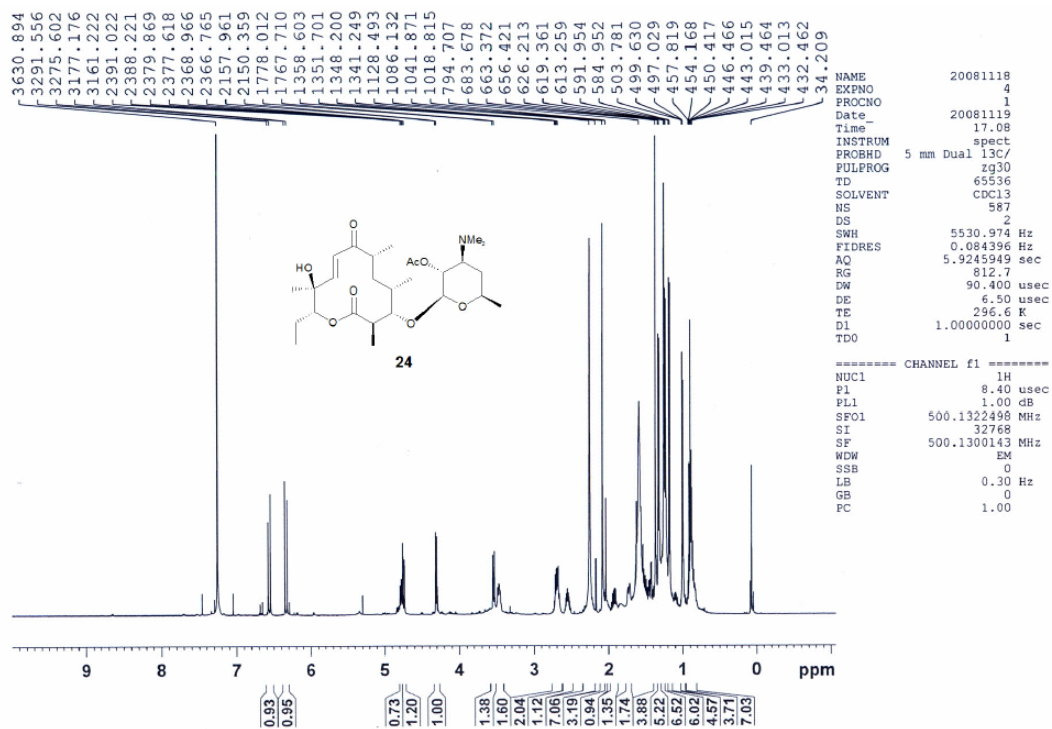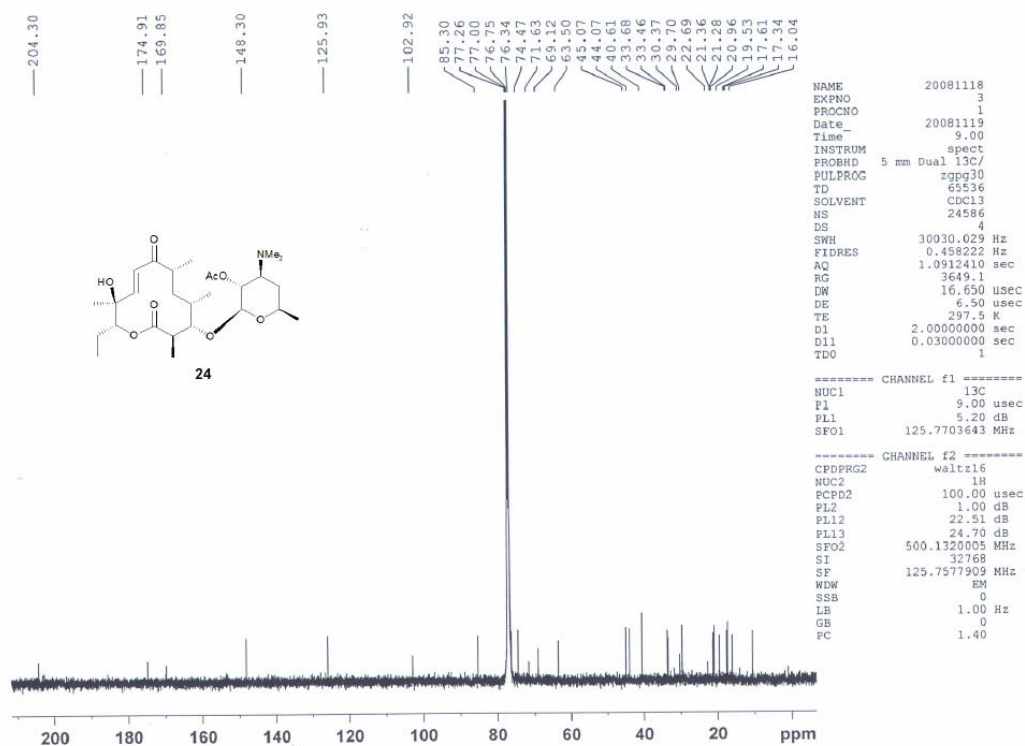

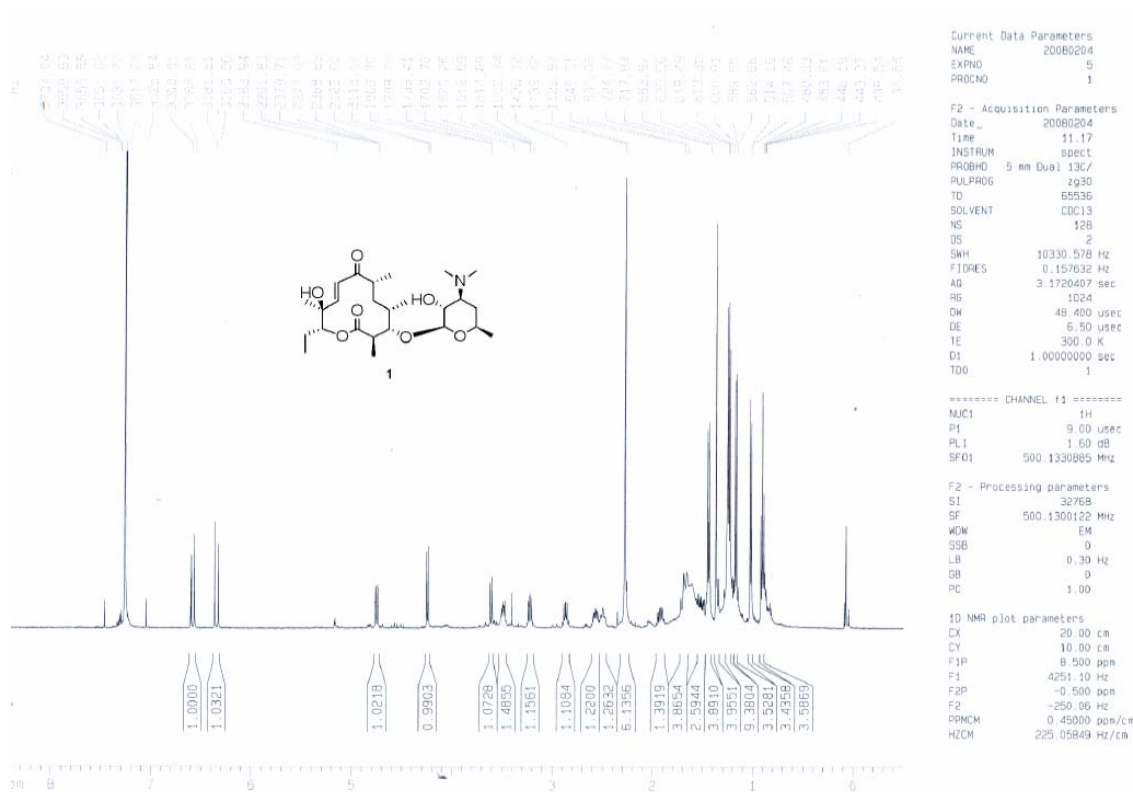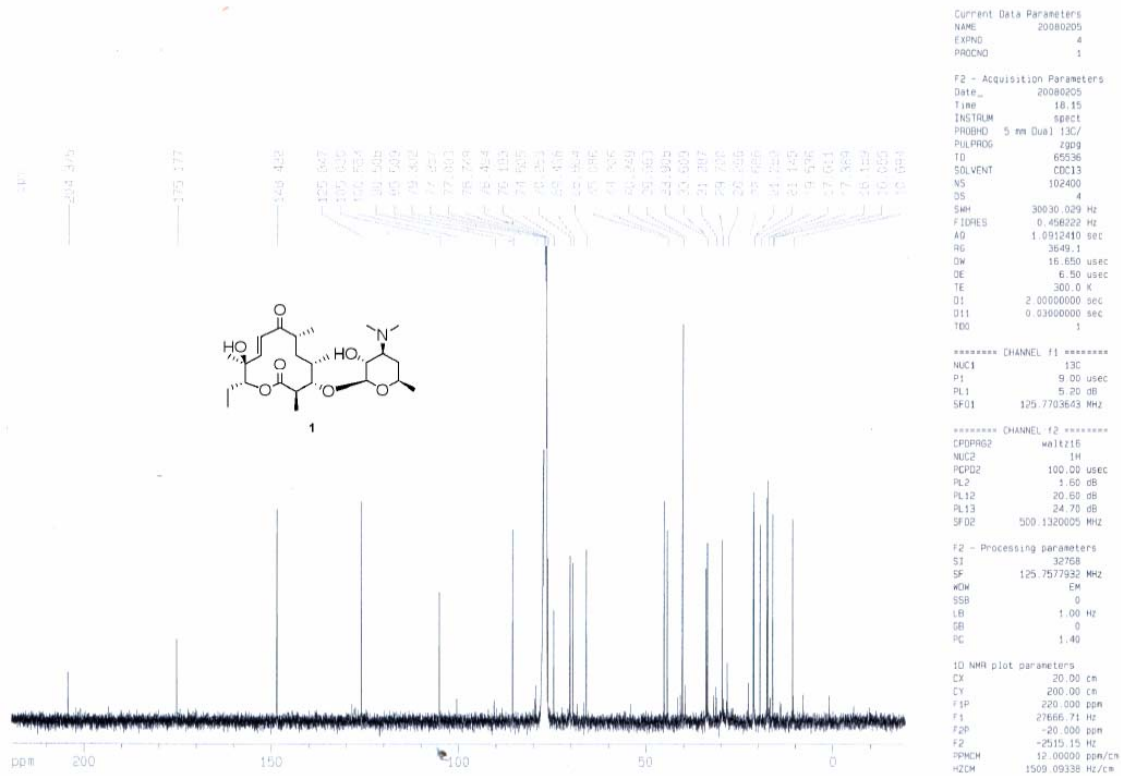

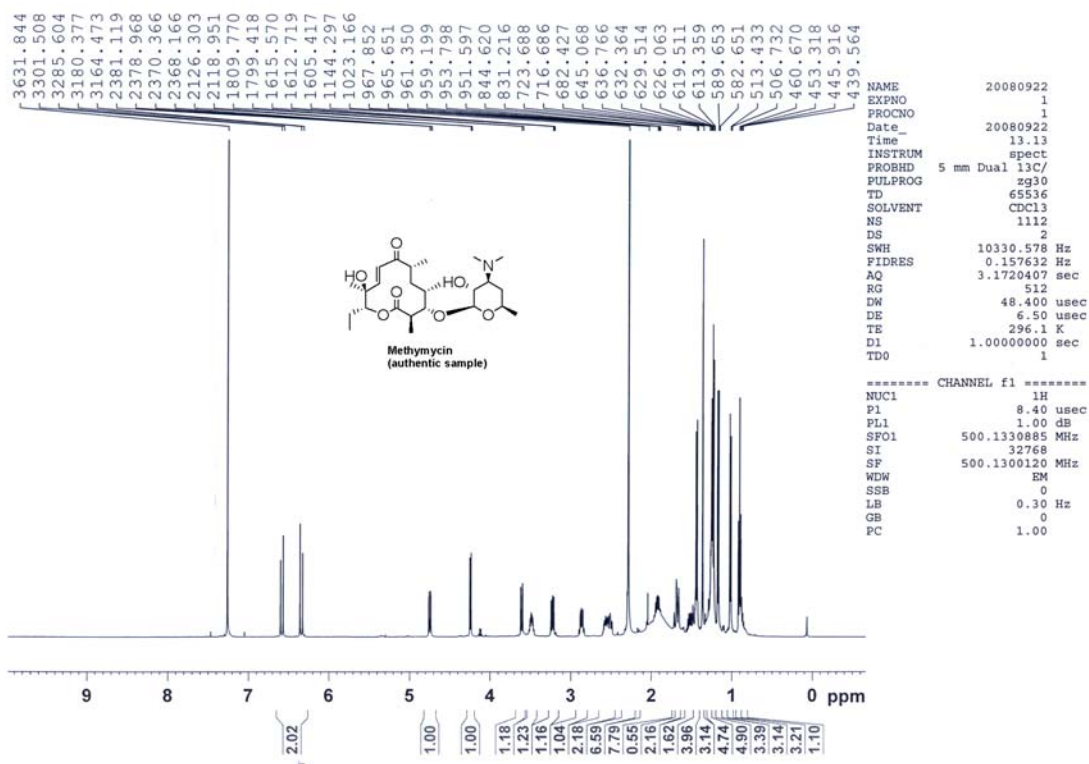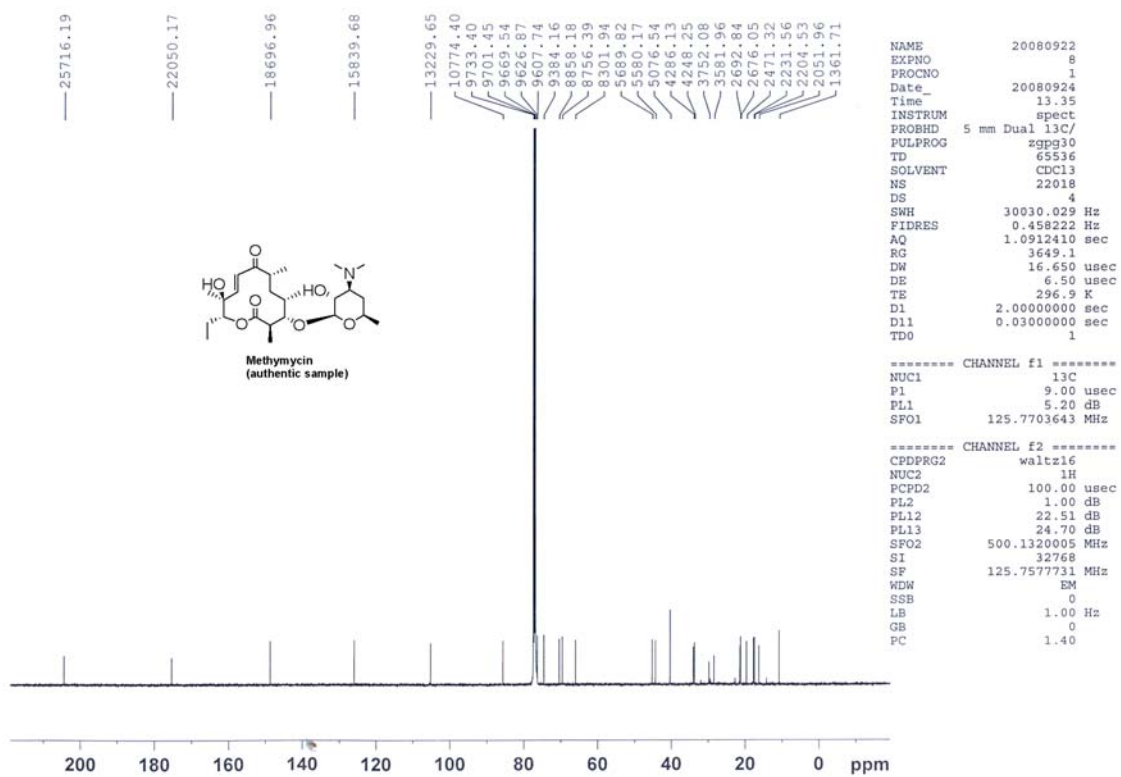

Supplement: b911200f.pdf [file b911200f.pdf]
